# Supplementary material for: A tandem coupling/smiles rearrangement/cyclization approach to 1,4-benzooxazinones or 1,4-pyridooxazinones under mild conditions
Source: Royal Society of Chemistry journal article supplement (doi:10.1039/c2ra20334k), 2012-01-01
Supplement: c2ra20334k.pdf [file c2ra20334k.pdf]

# Supporting Information

## A Tandem Coupling/Smiles Rearrangement/Cyclization Approach to 1,4-Benzooxazinones or 1,4-Pyridooxazinones under Mild Conditions

Chunjing Zhan,<sup>a</sup> Jiong Jia,<sup>a\*</sup> Bingchuan Yang,<sup>a</sup> Yanli Liu,<sup>a</sup> Aiping Huang<sup>a</sup> and Chen Ma<sup>a,b\*</sup>

<sup>a</sup> School of Chemistry and Chemical Engineering, Shandong University, Jinan, 250100, P. R. China.

<sup>b</sup> State Key Laboratory of Natural and Biomimetic Drugs, Peking University, Beijing, 100191, P. R. China.

### Experimental Section

NMR and mass spectrometry of Compound (4a-k), (3a-o), (5k).

1-40

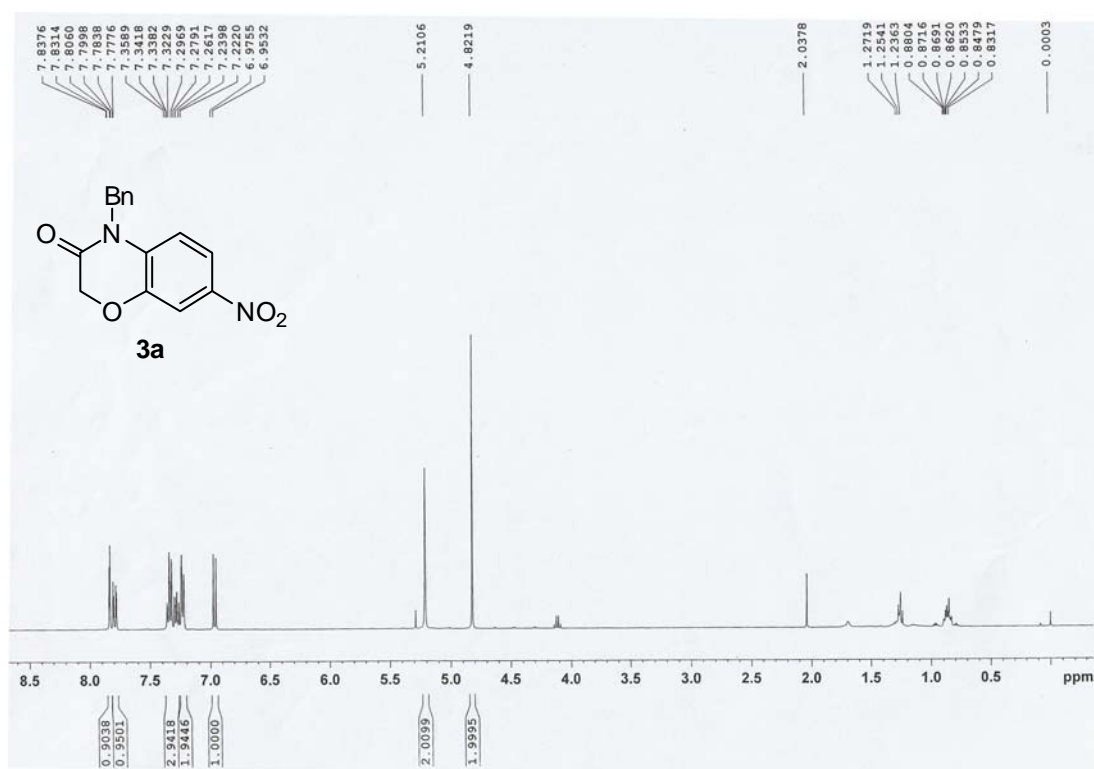

<sup>1</sup>H NMR (400 MHz, CDCl<sub>3</sub>)

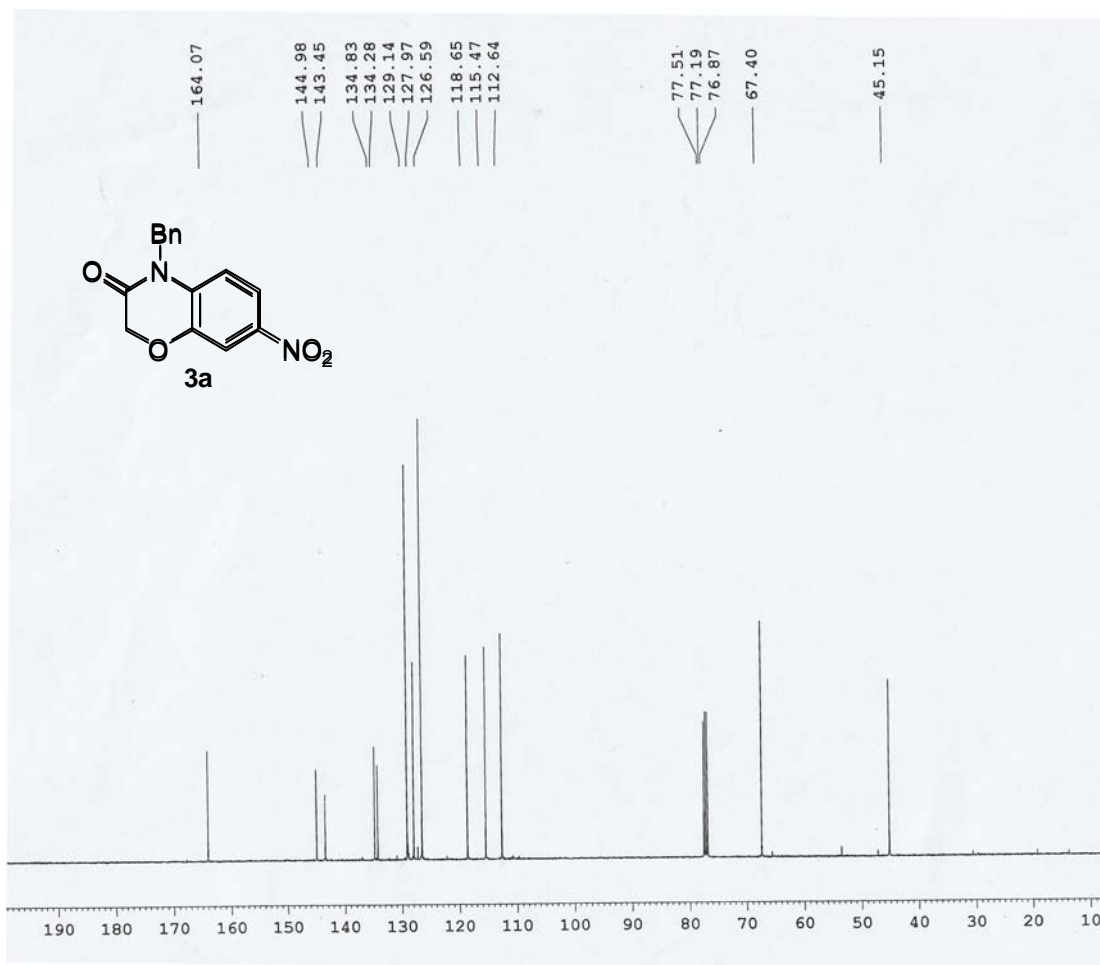

$^{13}\text{C}$  NMR(100 MHz,  $\text{CDCl}_3$ )

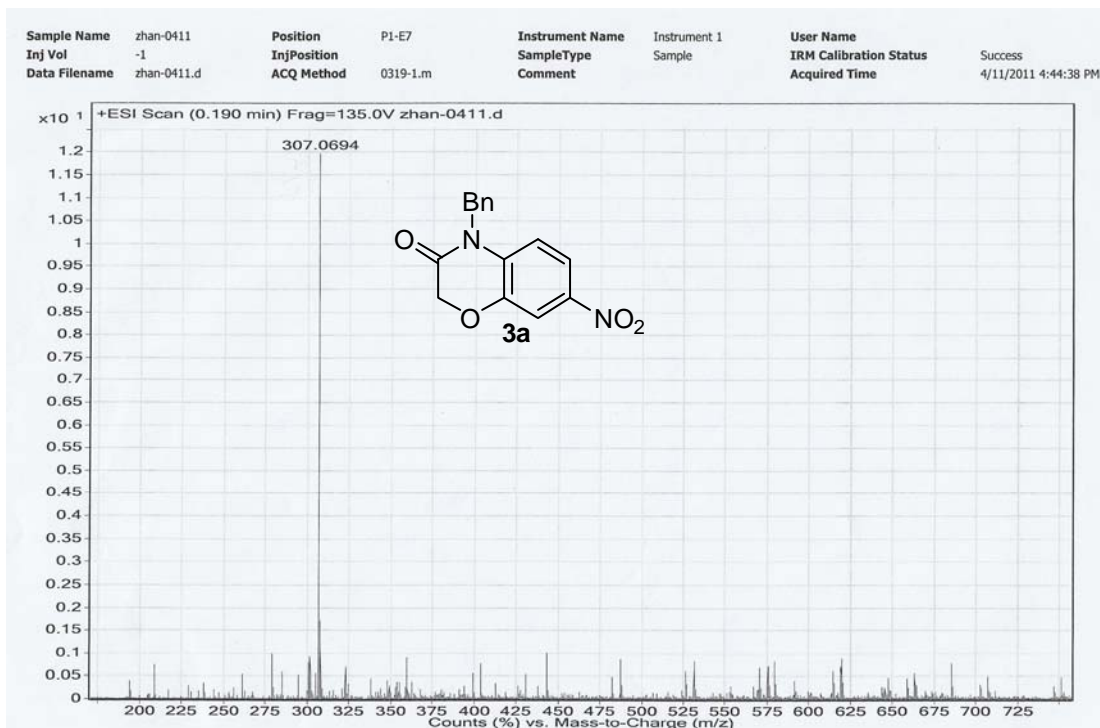

HRMS

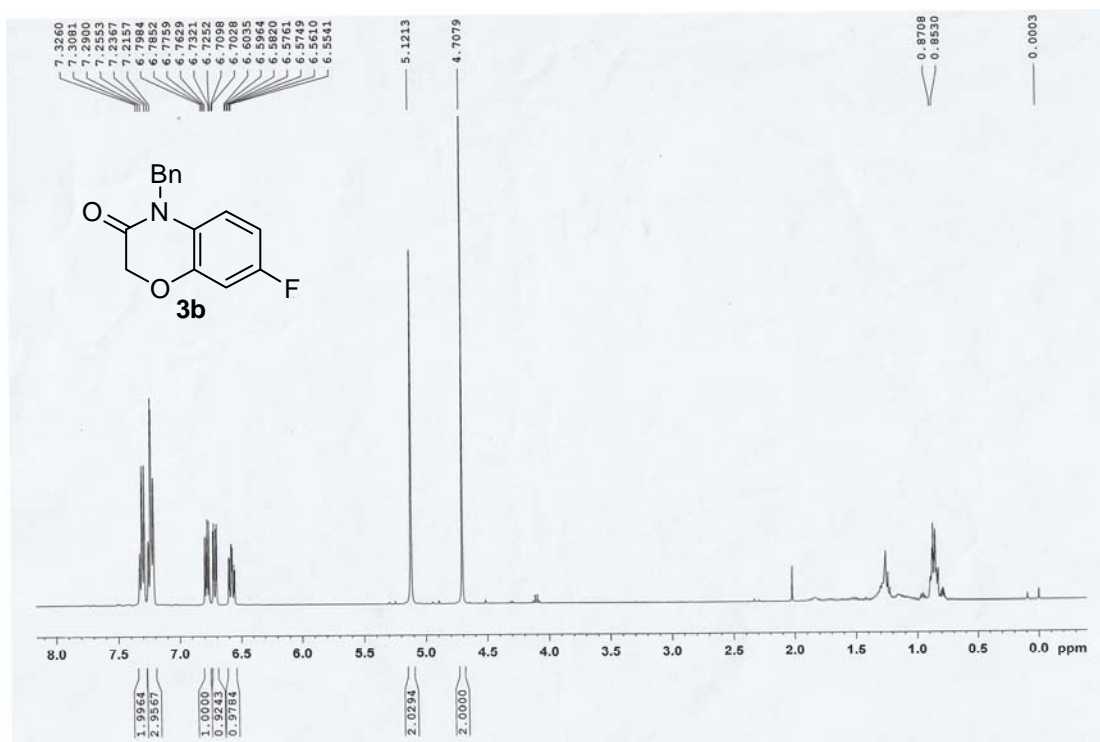

<sup>1</sup>H NMR (400 MHz, CDCl<sub>3</sub>)

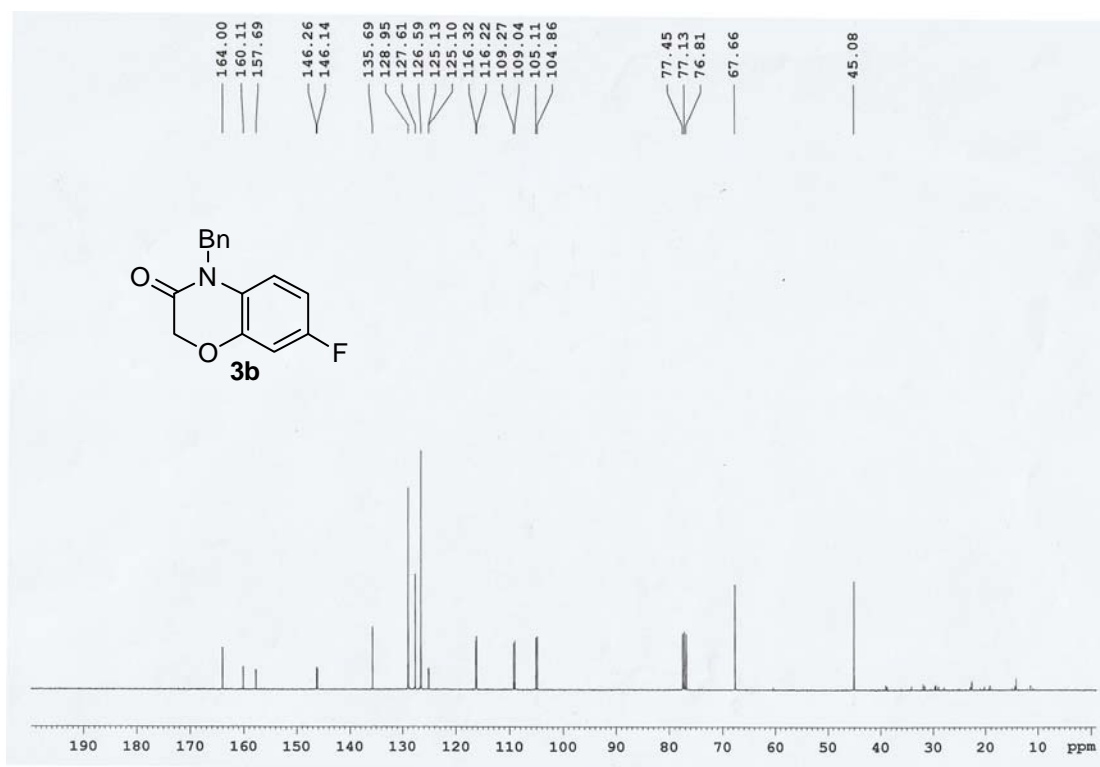

<sup>13</sup>C NMR (100 MHz, CDCl<sub>3</sub>)

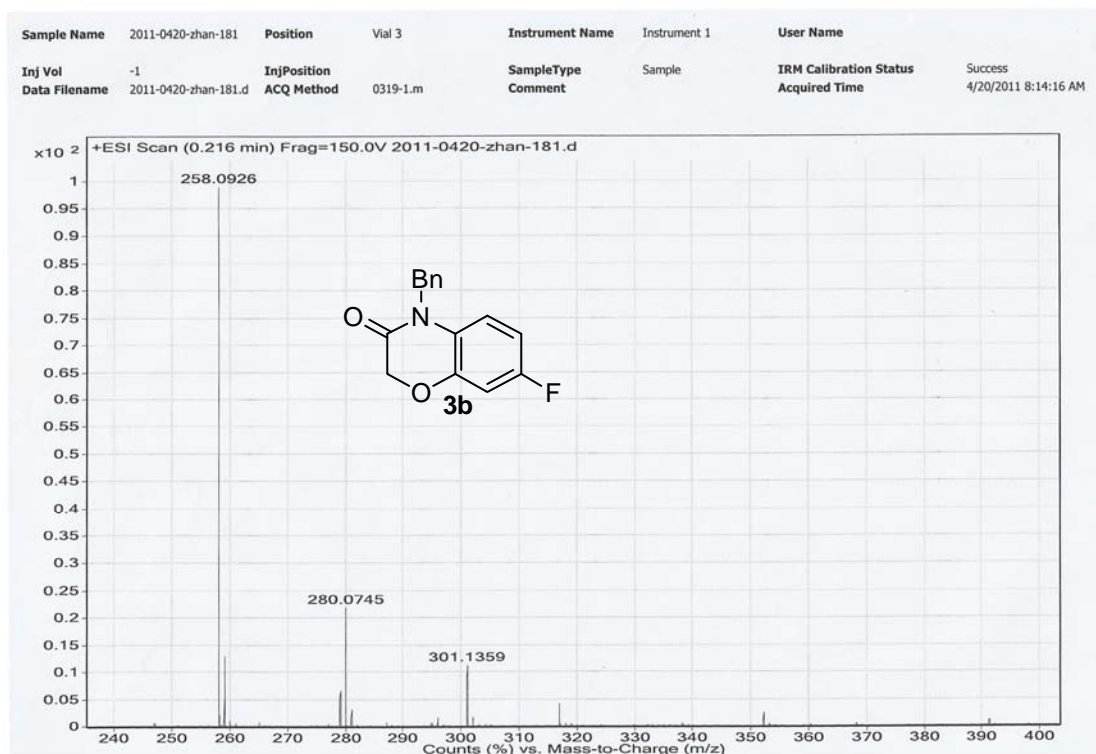

## HRMS

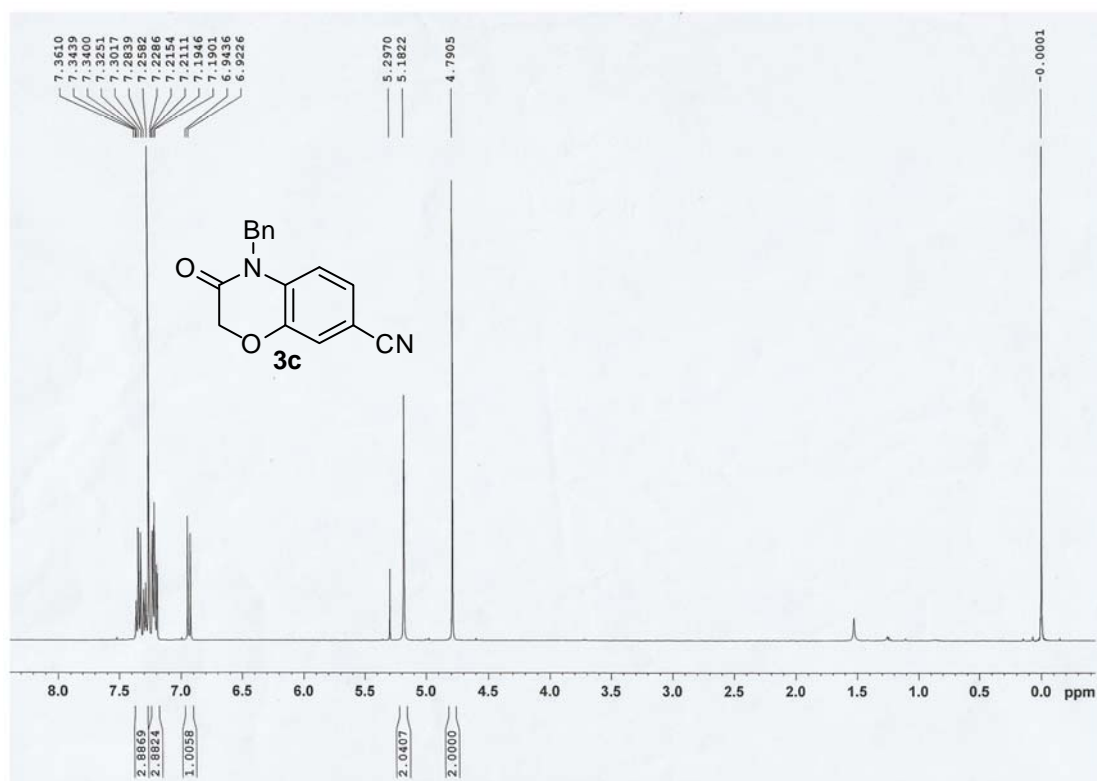

## <sup>1</sup>H NMR (400 MHz, CDCl<sub>3</sub>)

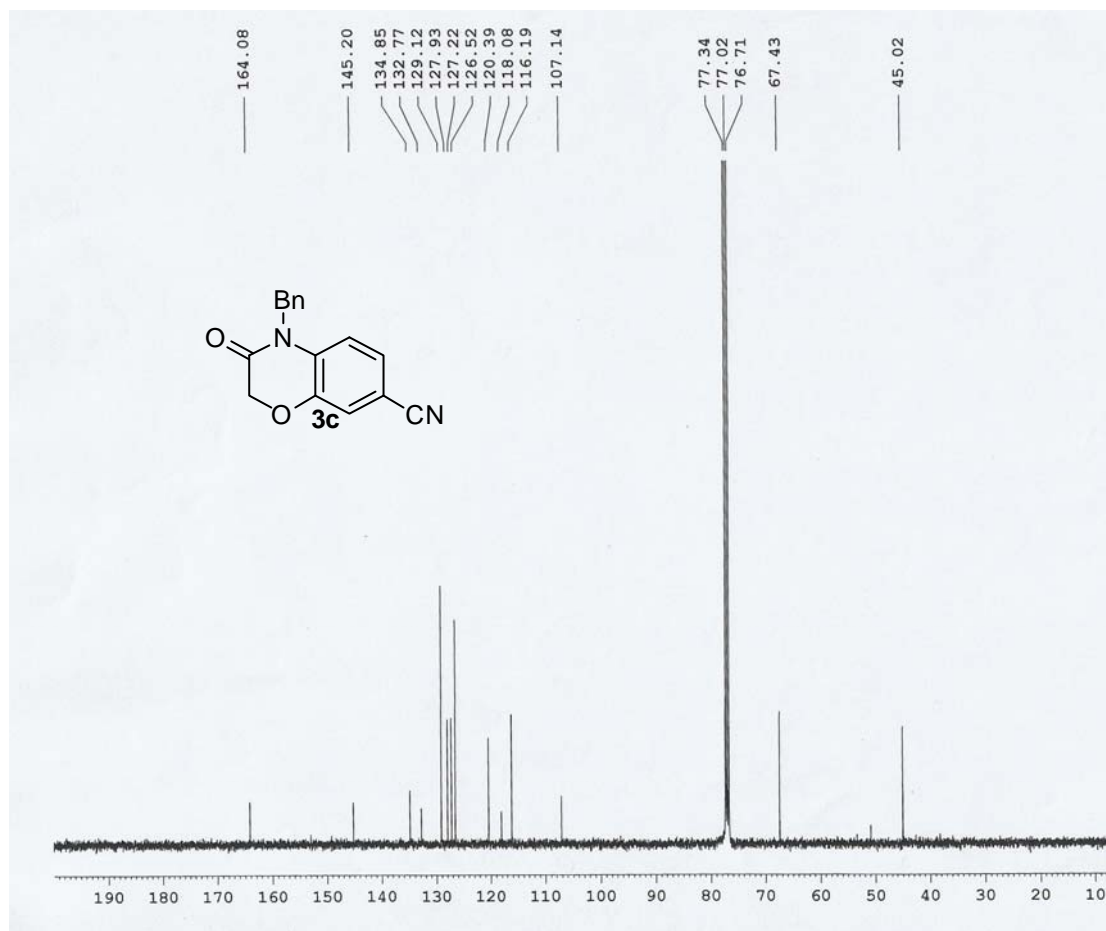

$^{13}\text{C}$  NMR(100 MHz,  $\text{CDCl}_3$ )

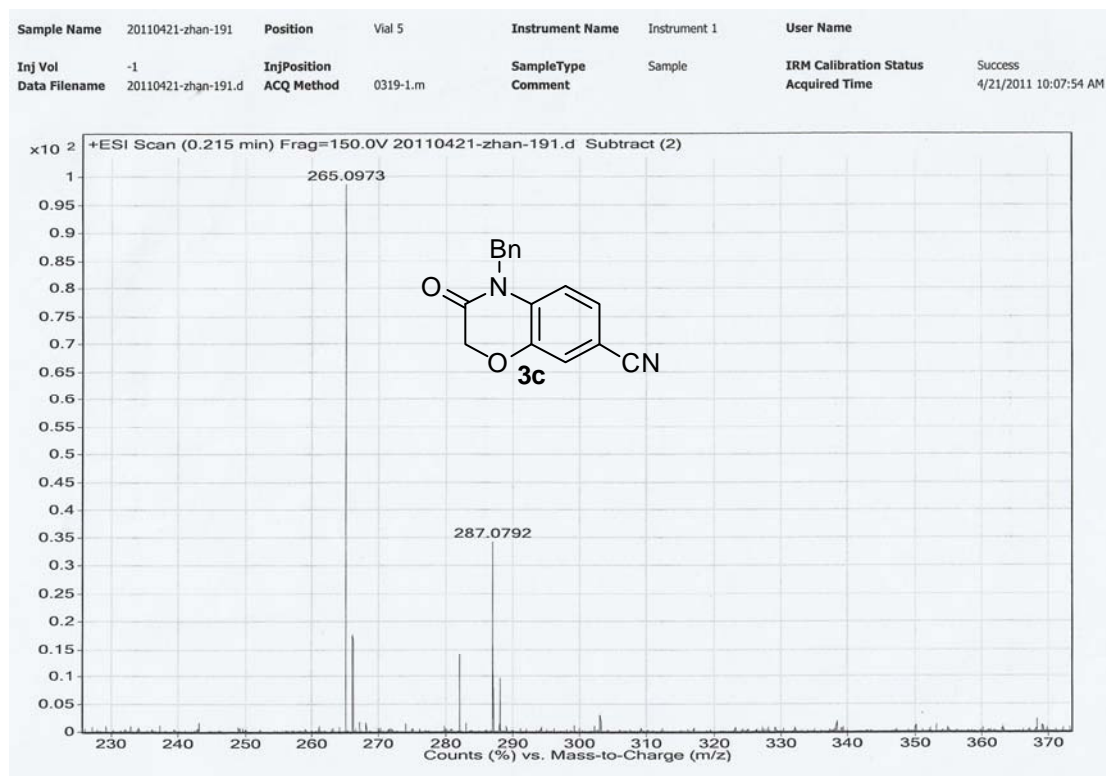

HRMS

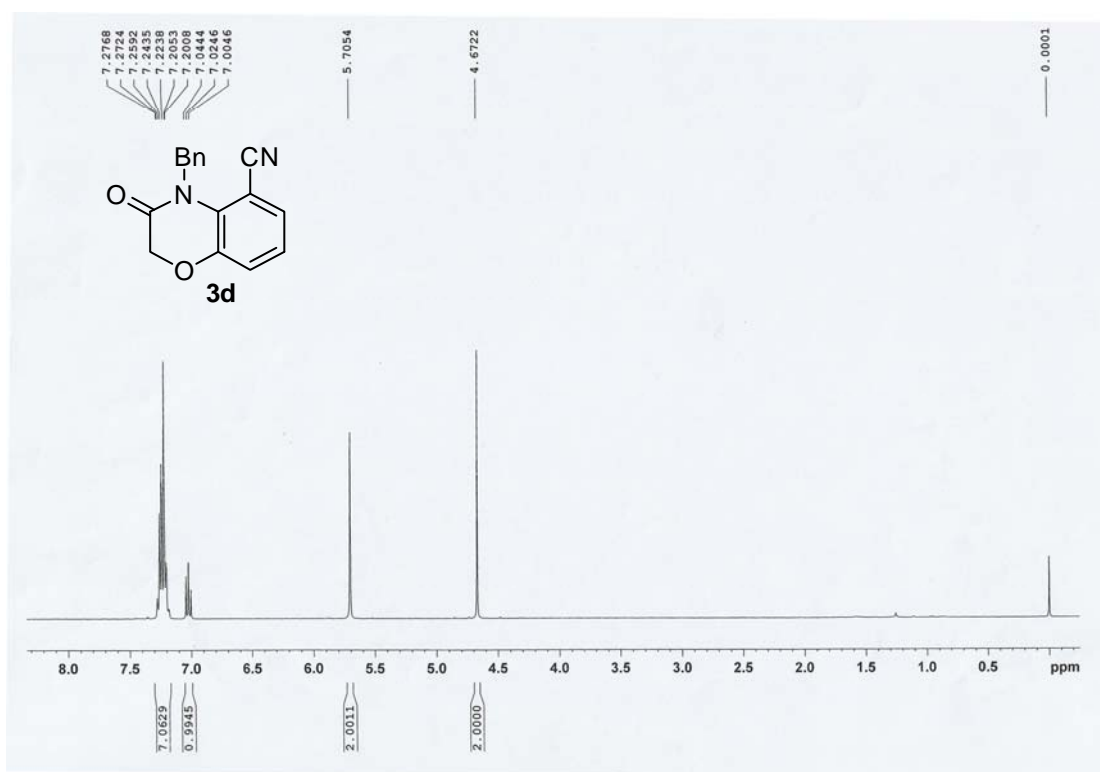

$^1\text{H}$  NMR (400 MHz,  $\text{CDCl}_3$ )

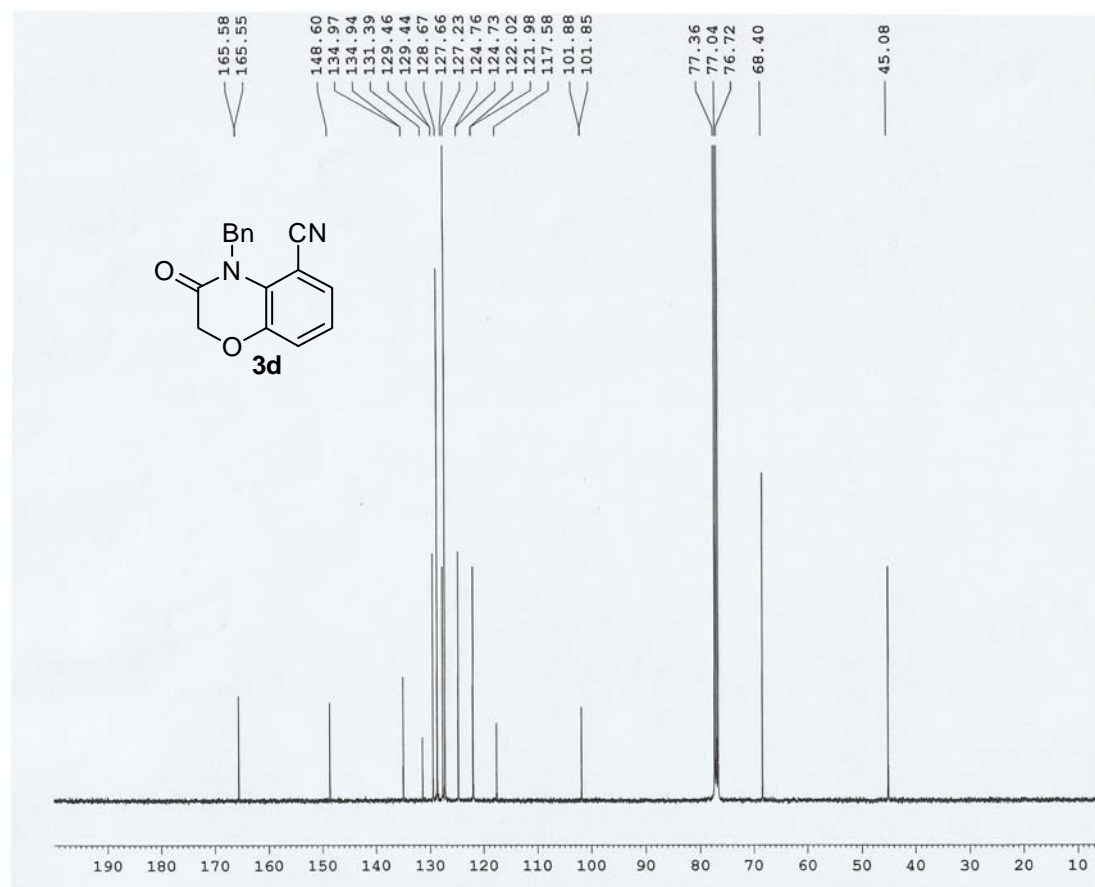

$^{13}\text{C}$  NMR (100 MHz,  $\text{CDCl}_3$ )

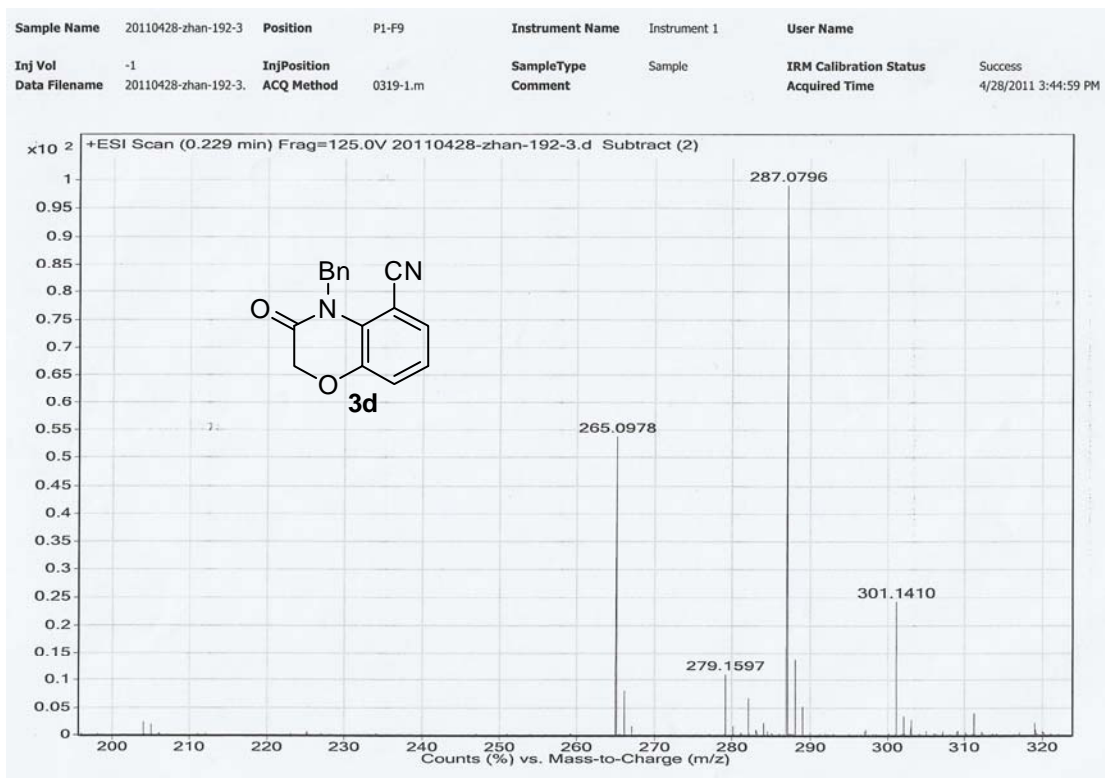

HRMS

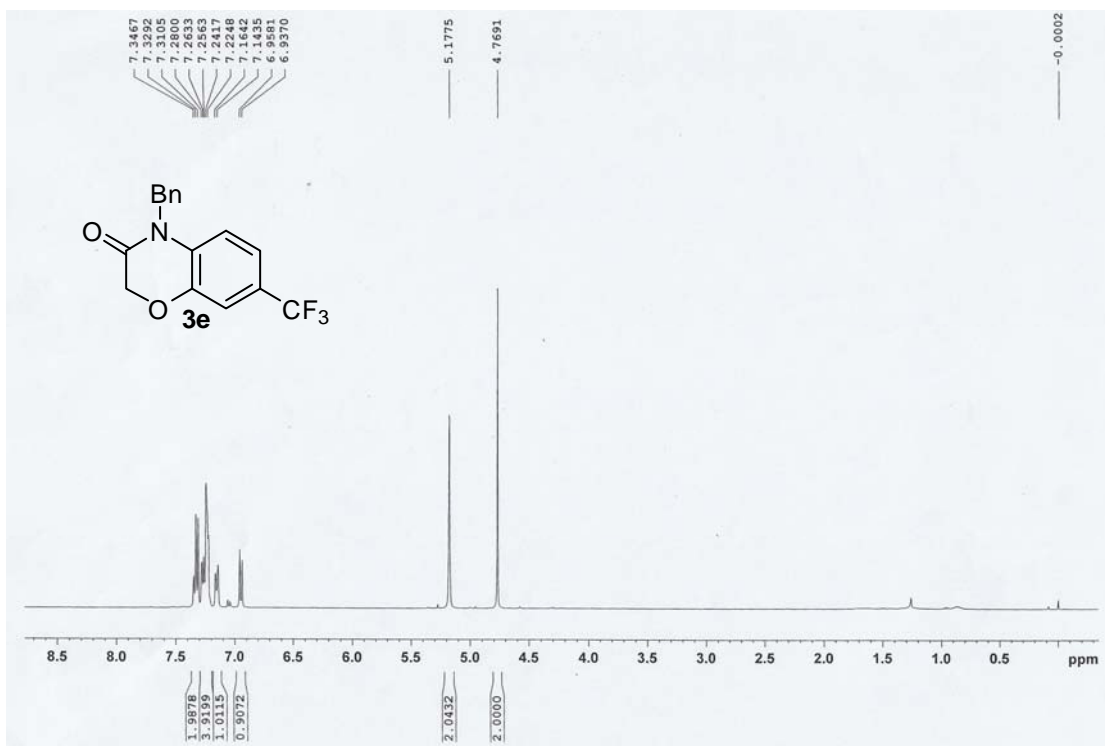

$^1\text{H}$  NMR (400 MHz,  $\text{CDCl}_3$ )

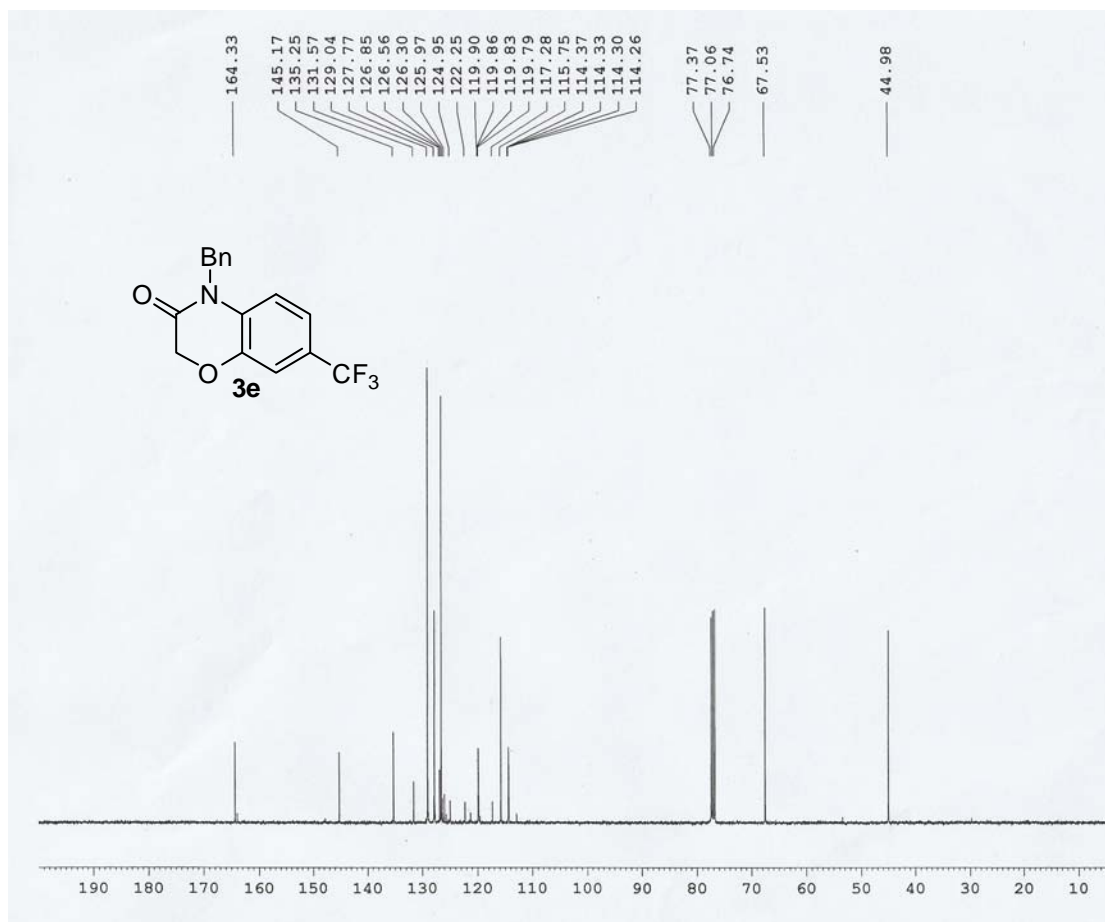

$^{13}\text{C}$  NMR(100 MHz,  $\text{CDCl}_3$ )

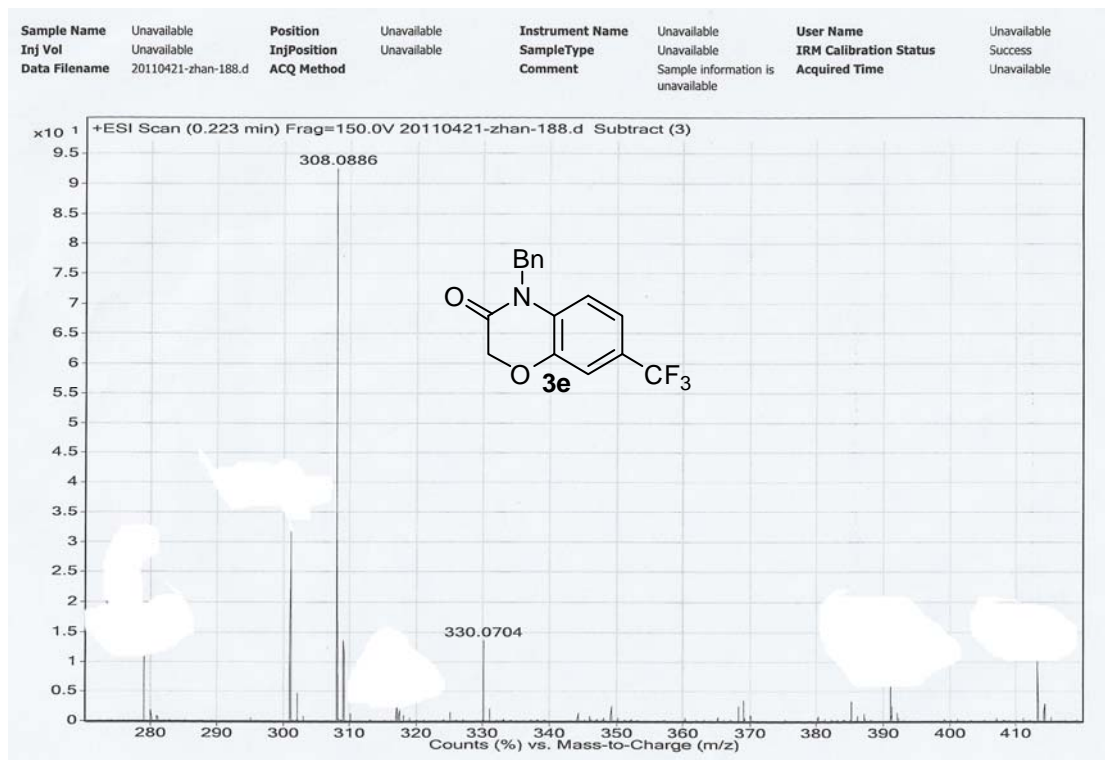

HRMS



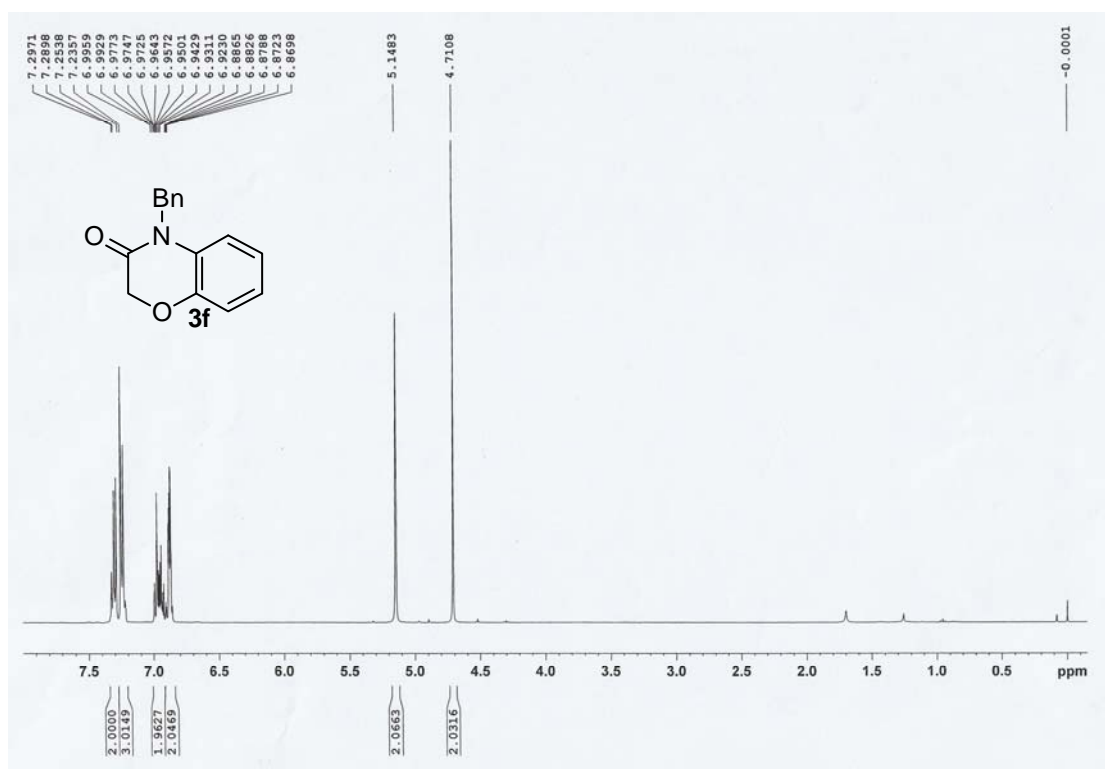

$^1\text{H NMR}$  (400 MHz,  $\text{CDCl}_3$ )

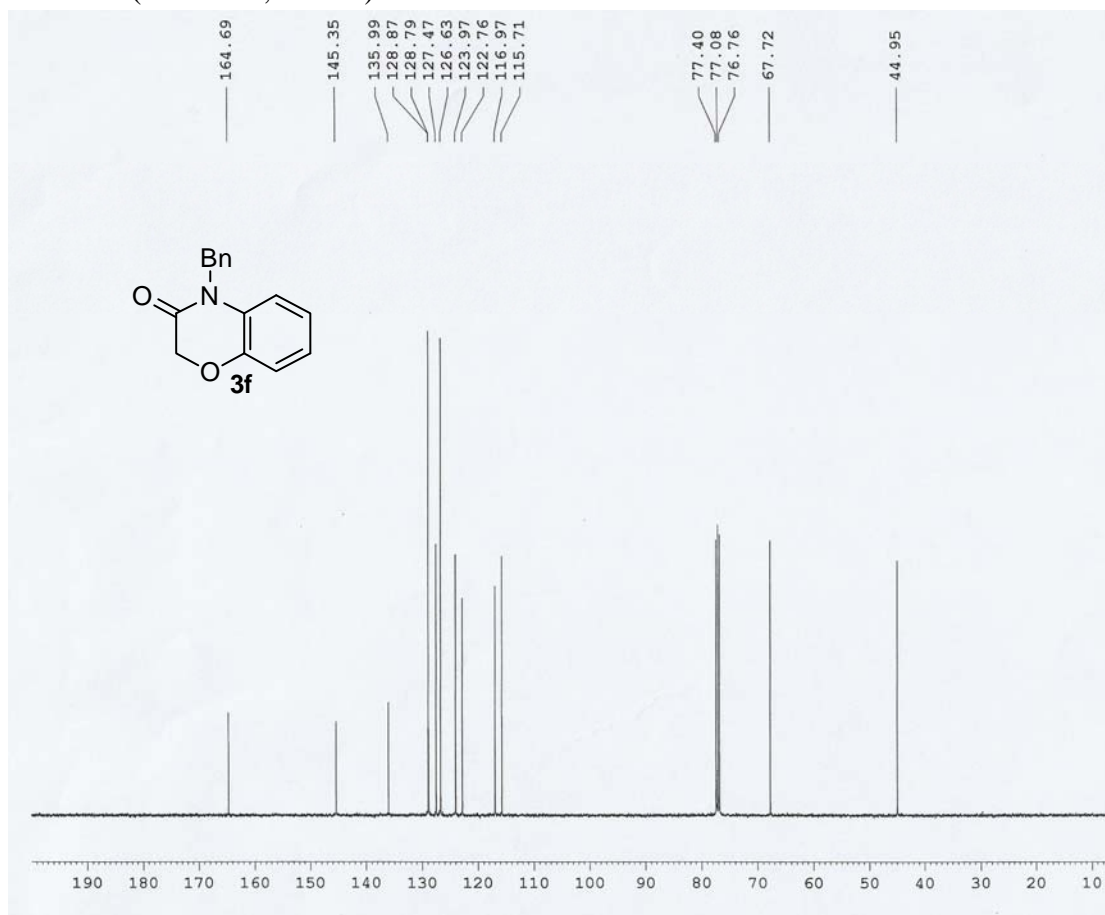

$^{13}\text{C NMR}$  (100 MHz,  $\text{CDCl}_3$ )

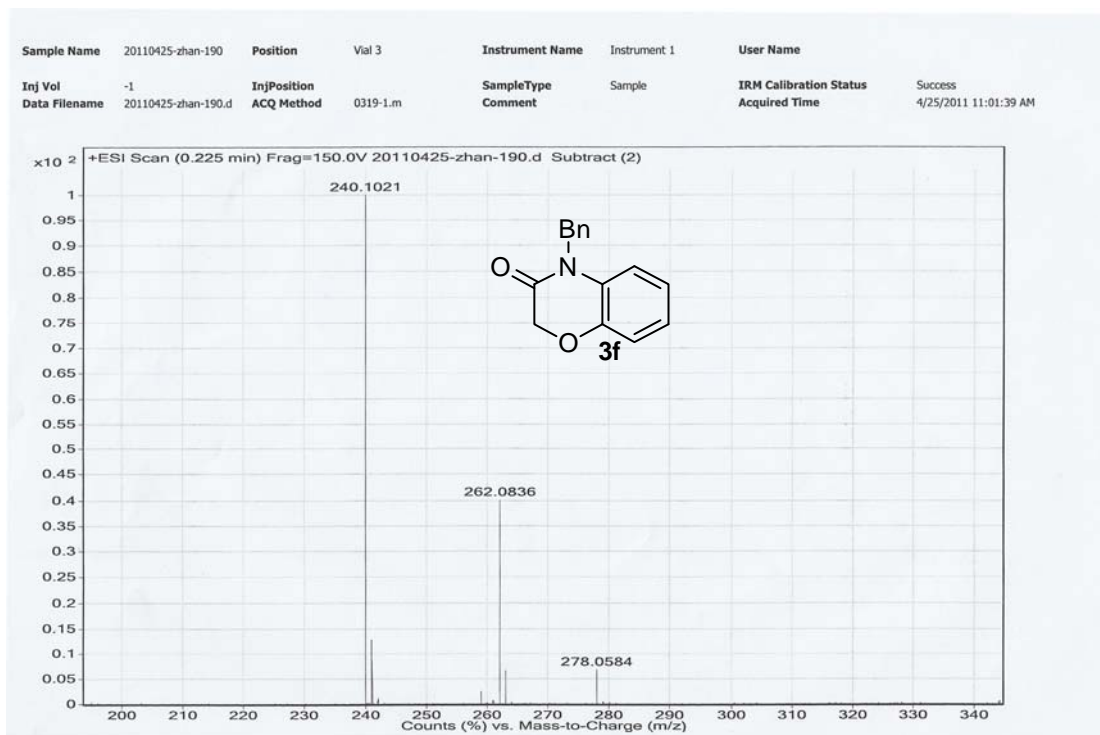

## HRMS

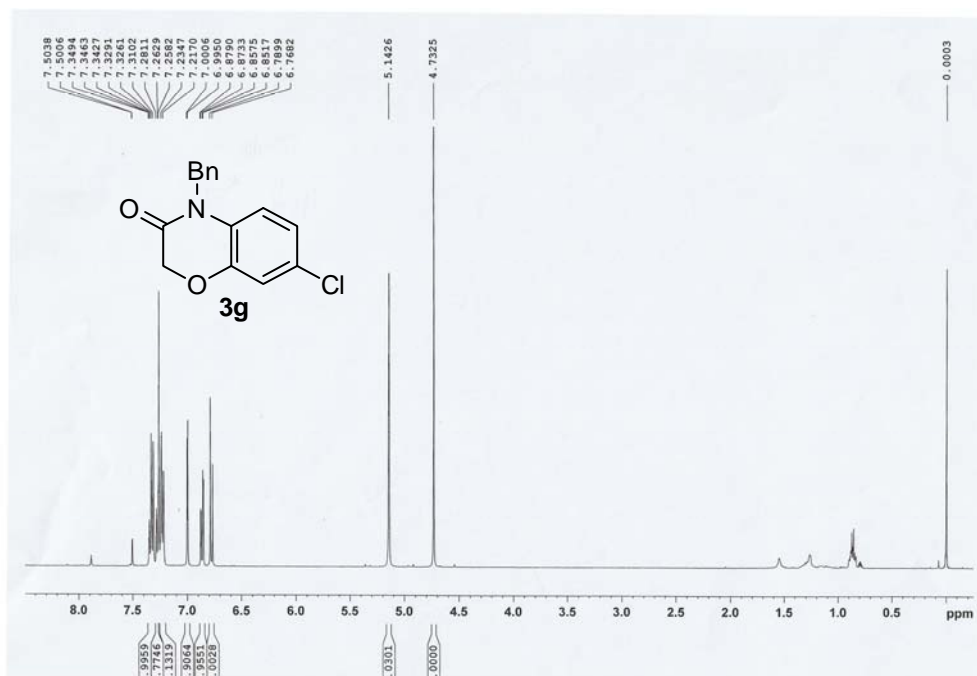

$^1\text{H}$  NMR (400 MHz,  $\text{CDCl}_3$ )

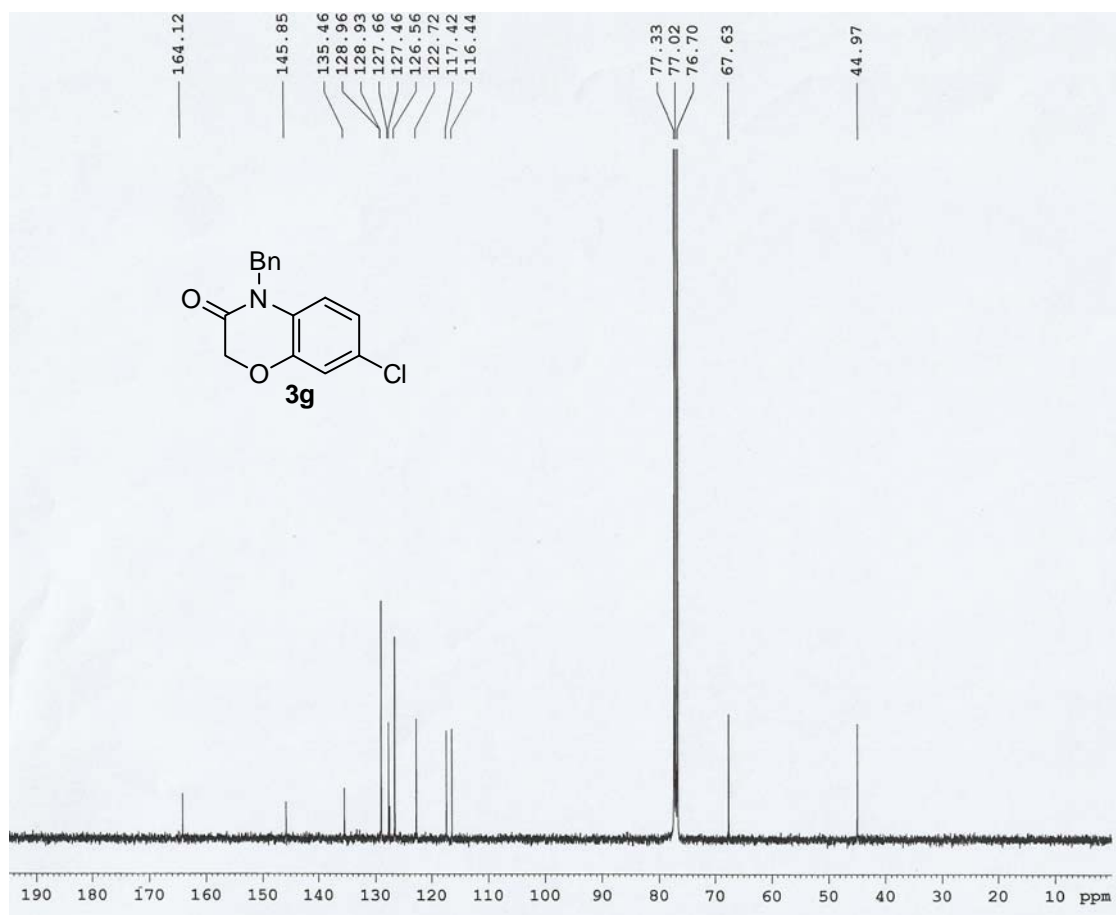

<sup>13</sup>C NMR(100 MHz, CDCl<sub>3</sub>)

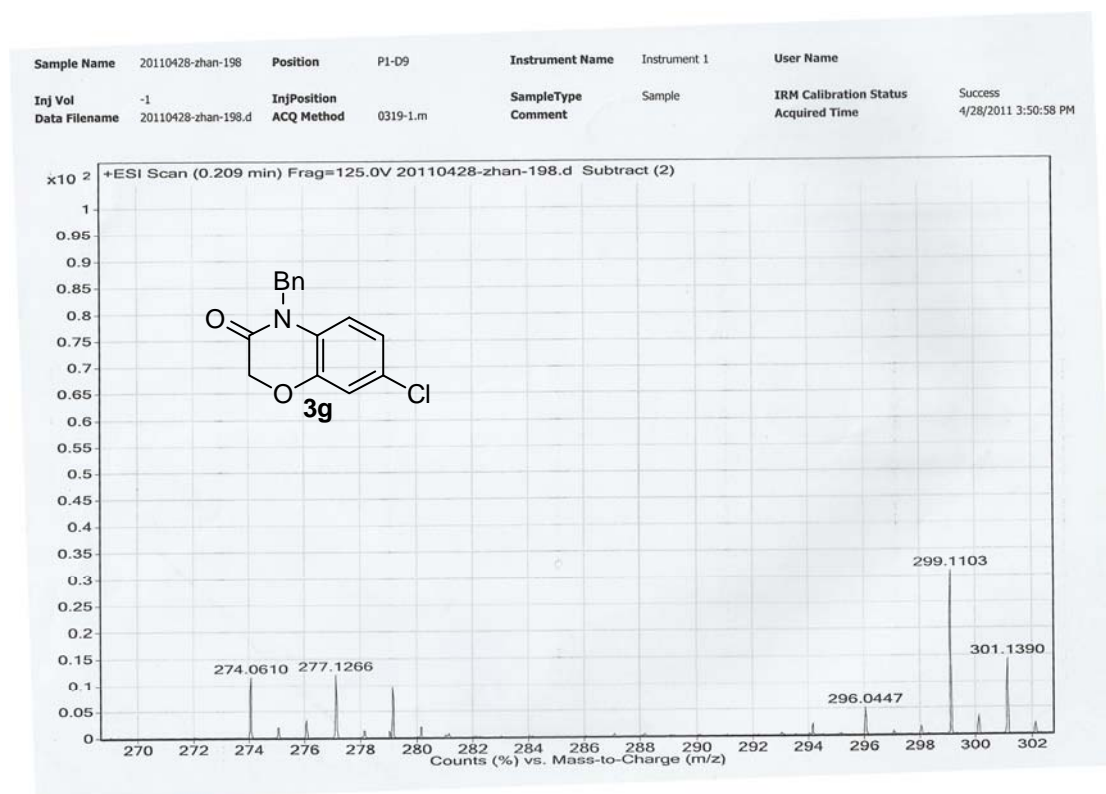

HRMS

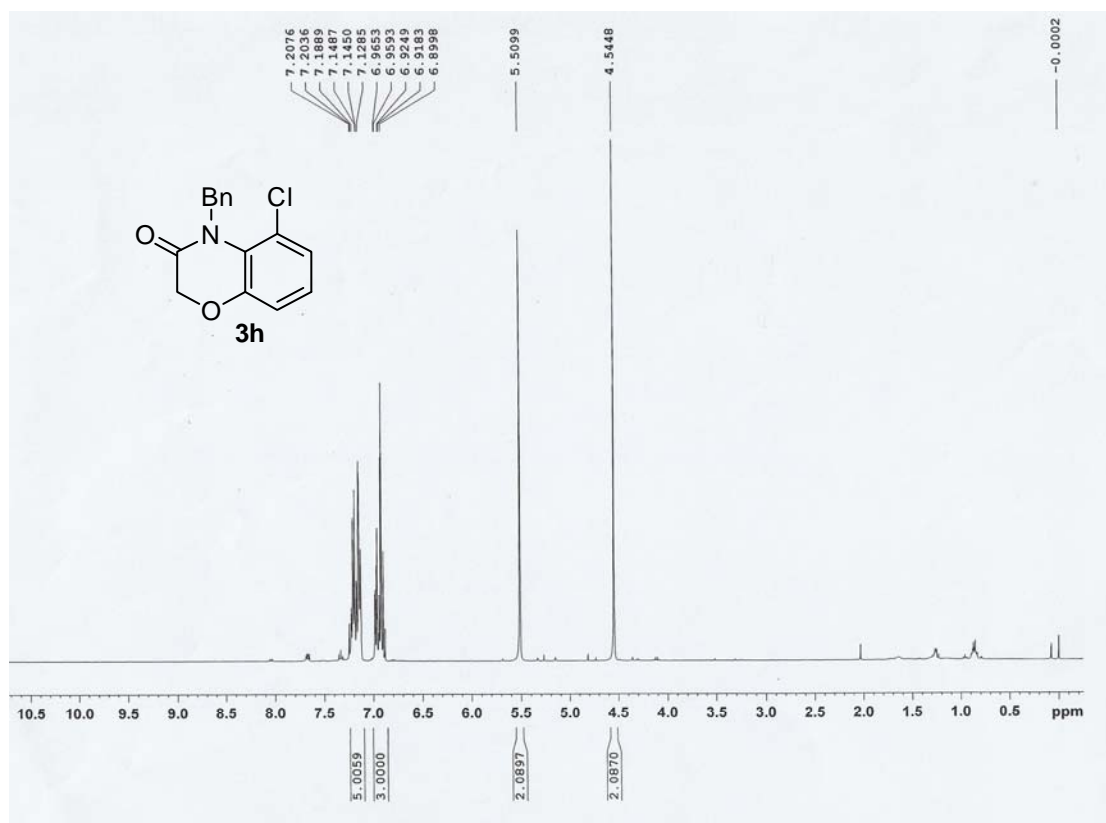

<sup>1</sup>H NMR (400 MHz, CDCl<sub>3</sub>)

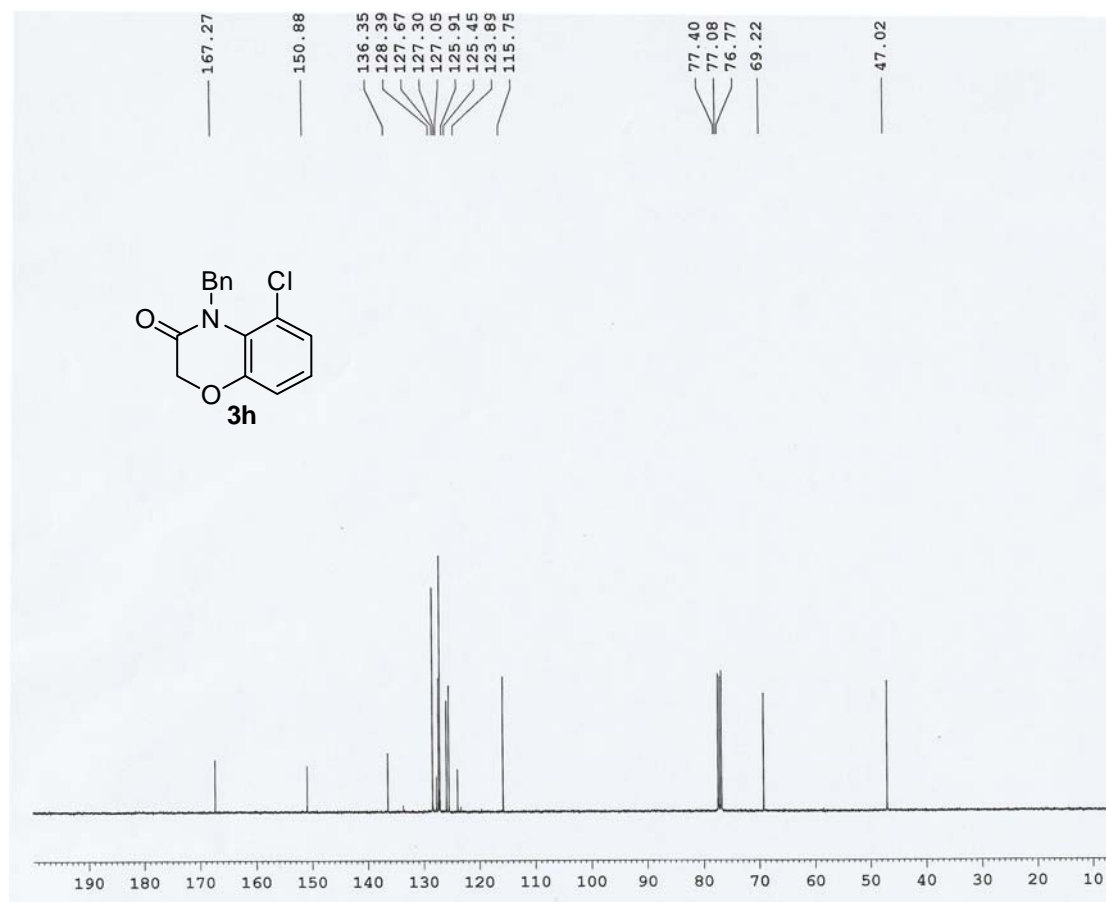

$^{13}\text{C}$  NMR (100 MHz,  $\text{CDCl}_3$ )

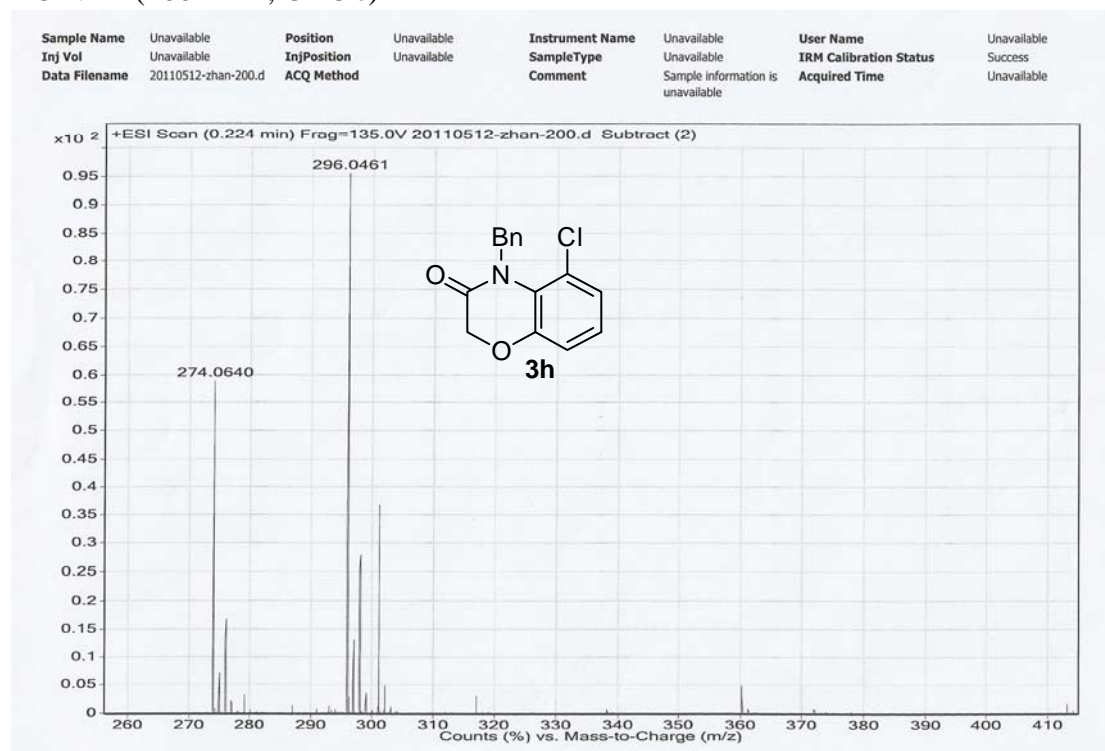

HRMS

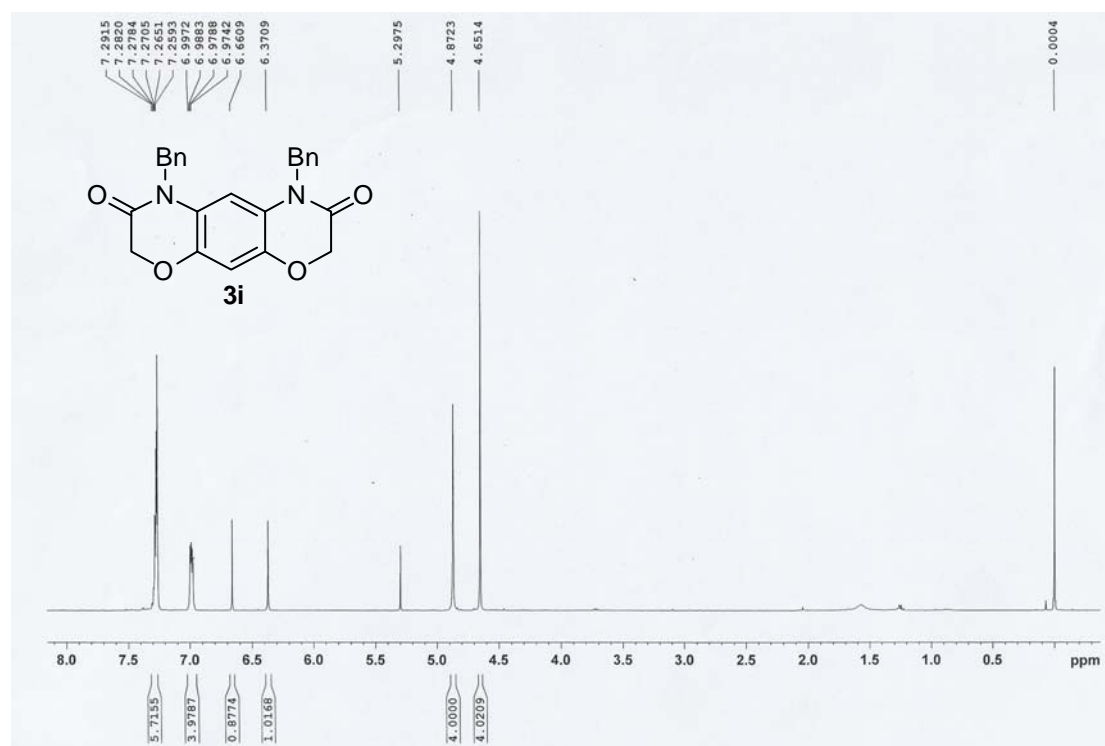

$^1\text{H}$  NMR (400 MHz,  $\text{CDCl}_3$ )

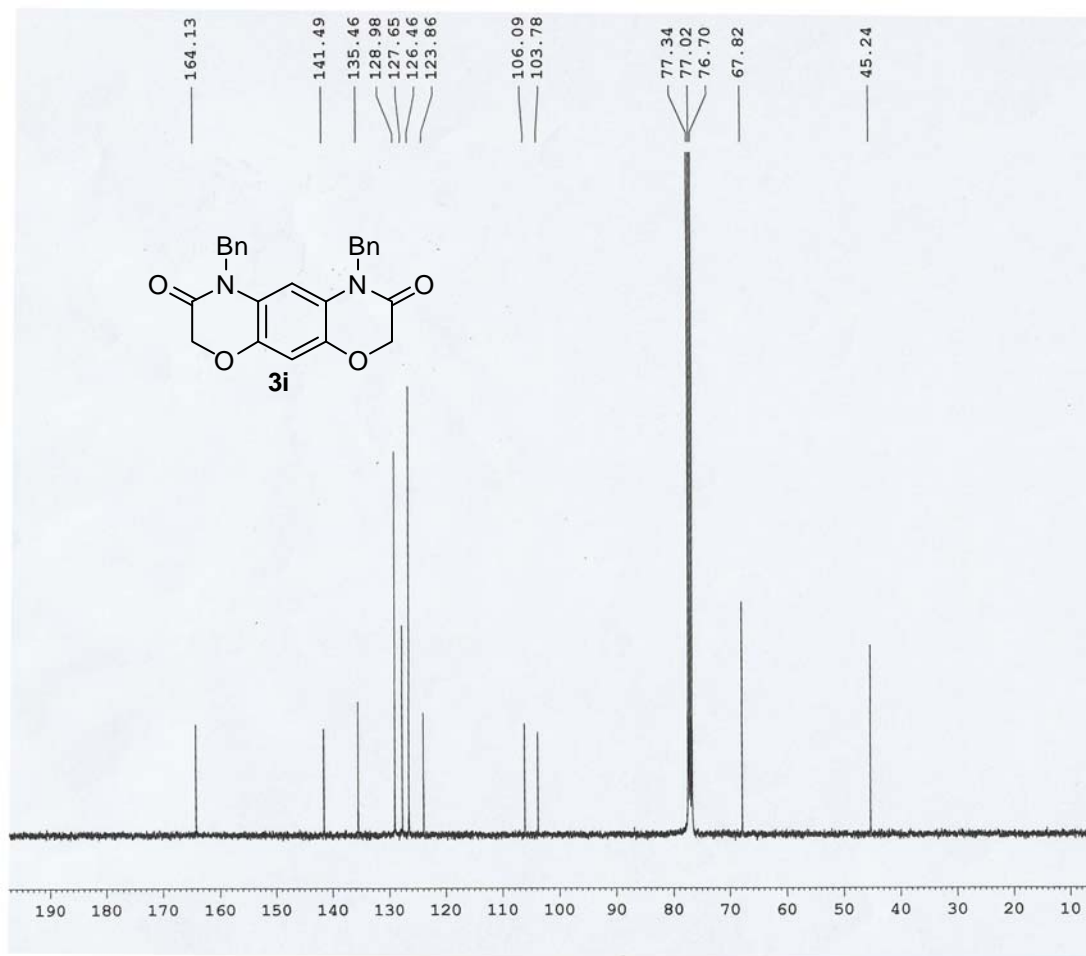

**<sup>13</sup>C NMR (100 MHz, CDCl<sub>3</sub>)**

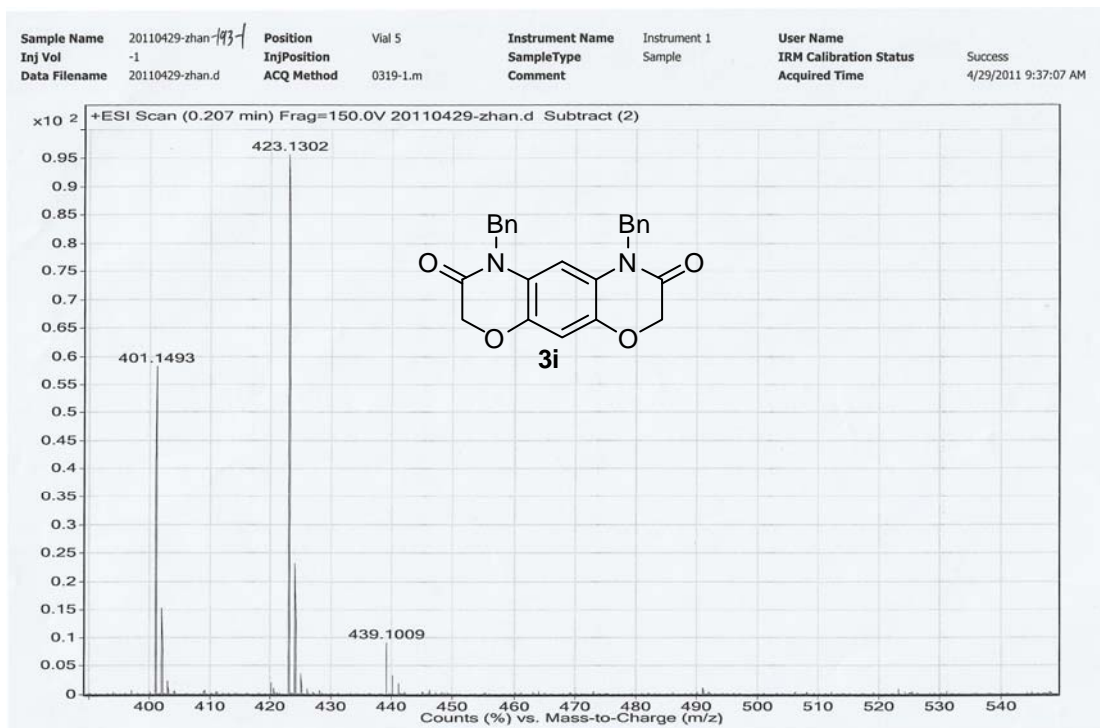

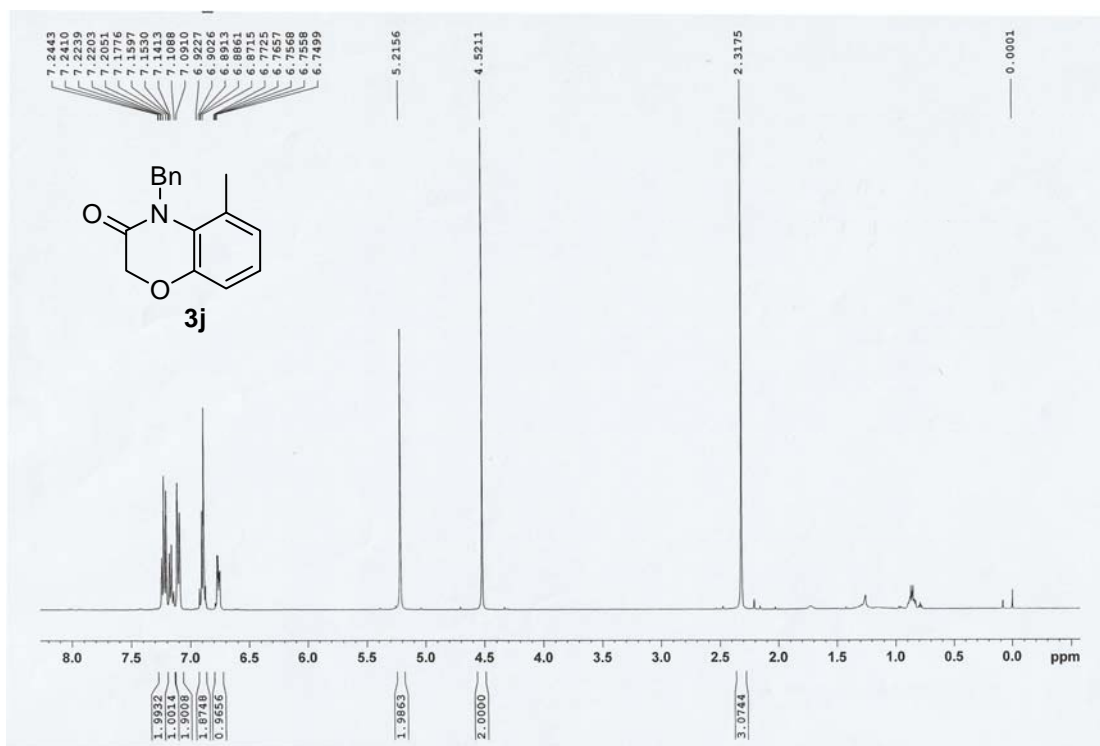

$^1\text{H NMR}$  (400 MHz,  $\text{CDCl}_3$ )

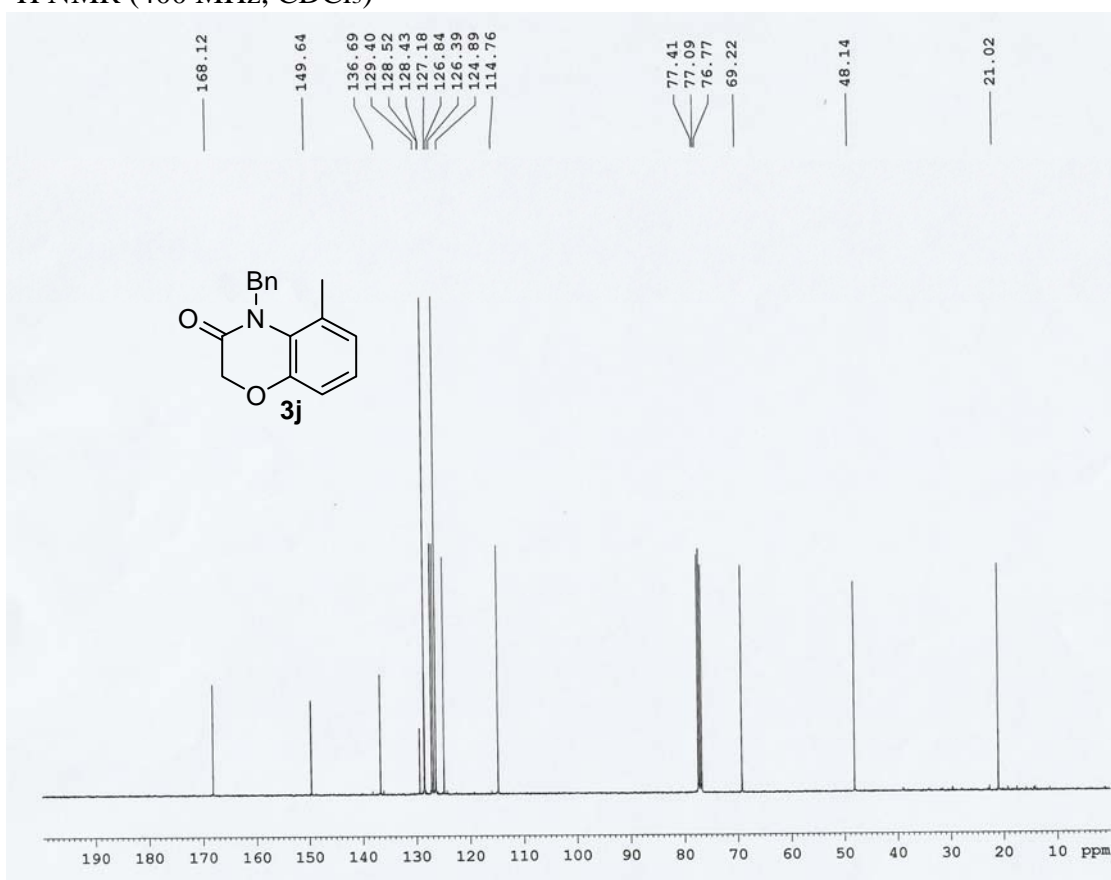

$^{13}\text{C NMR}$  (100 MHz,  $\text{CDCl}_3$ )

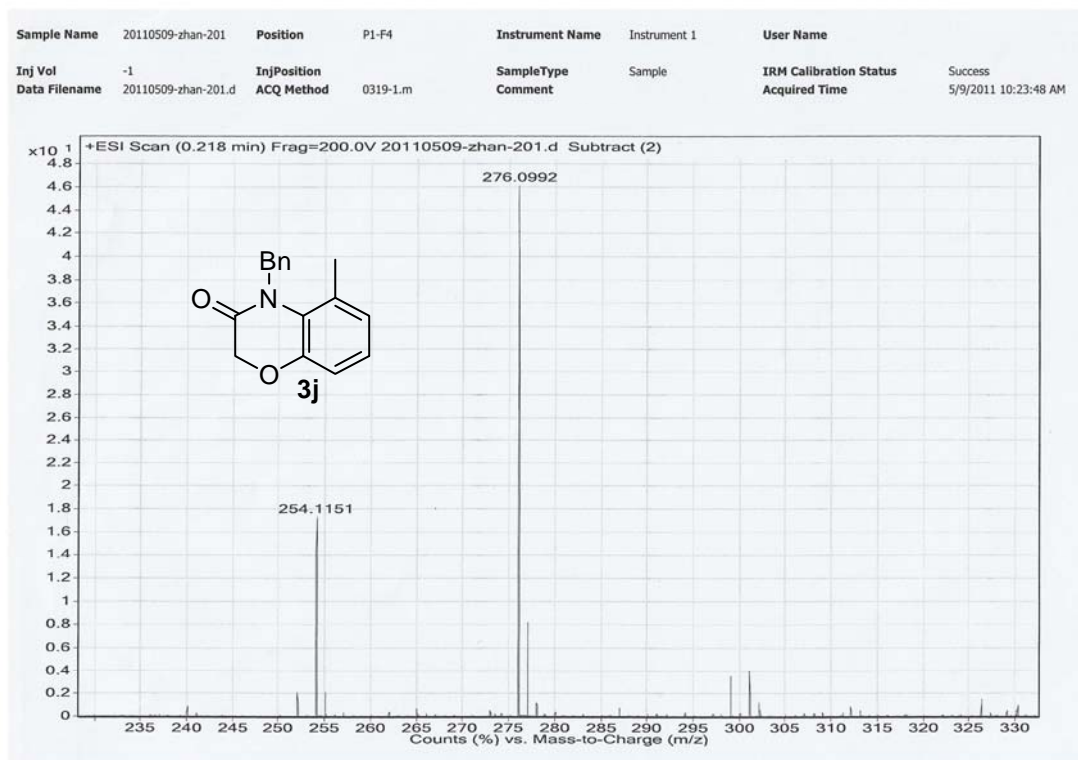

### HRMS

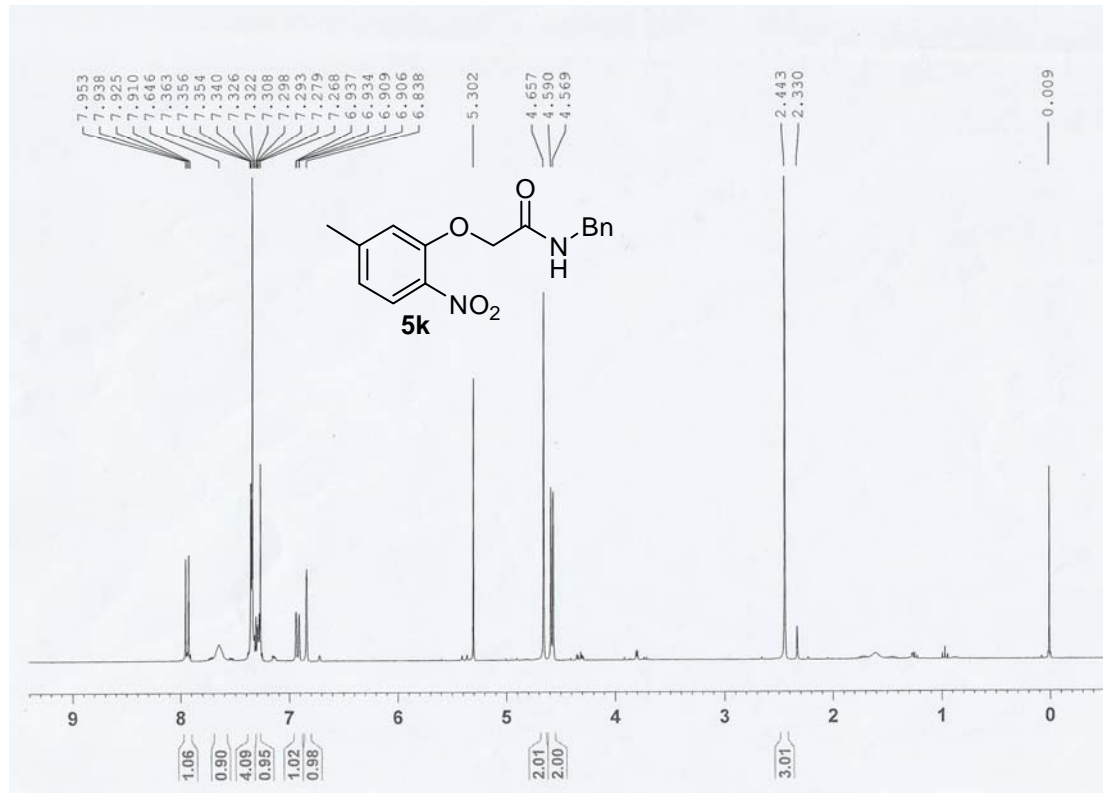

<sup>1</sup>H NMR (300 MHz, CDCl<sub>3</sub>)



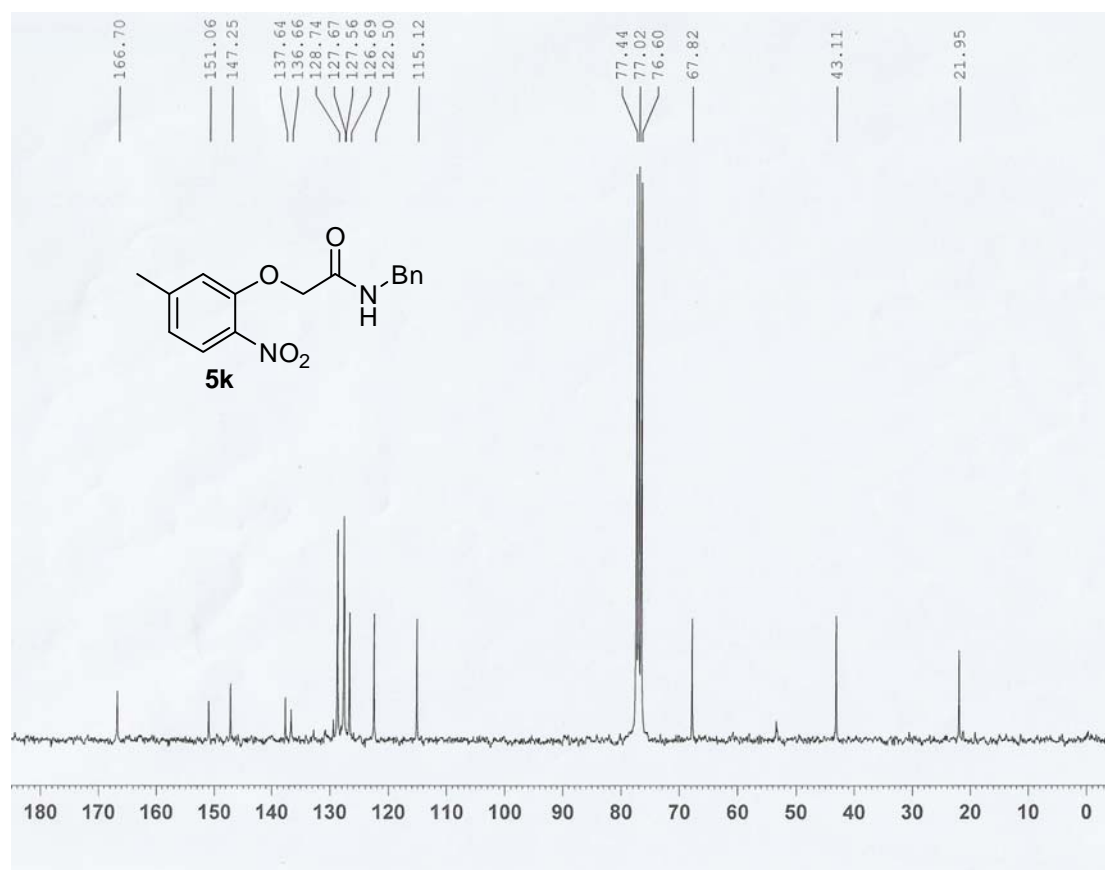

<sup>13</sup>C NMR (75 MHz, CDCl<sub>3</sub>)

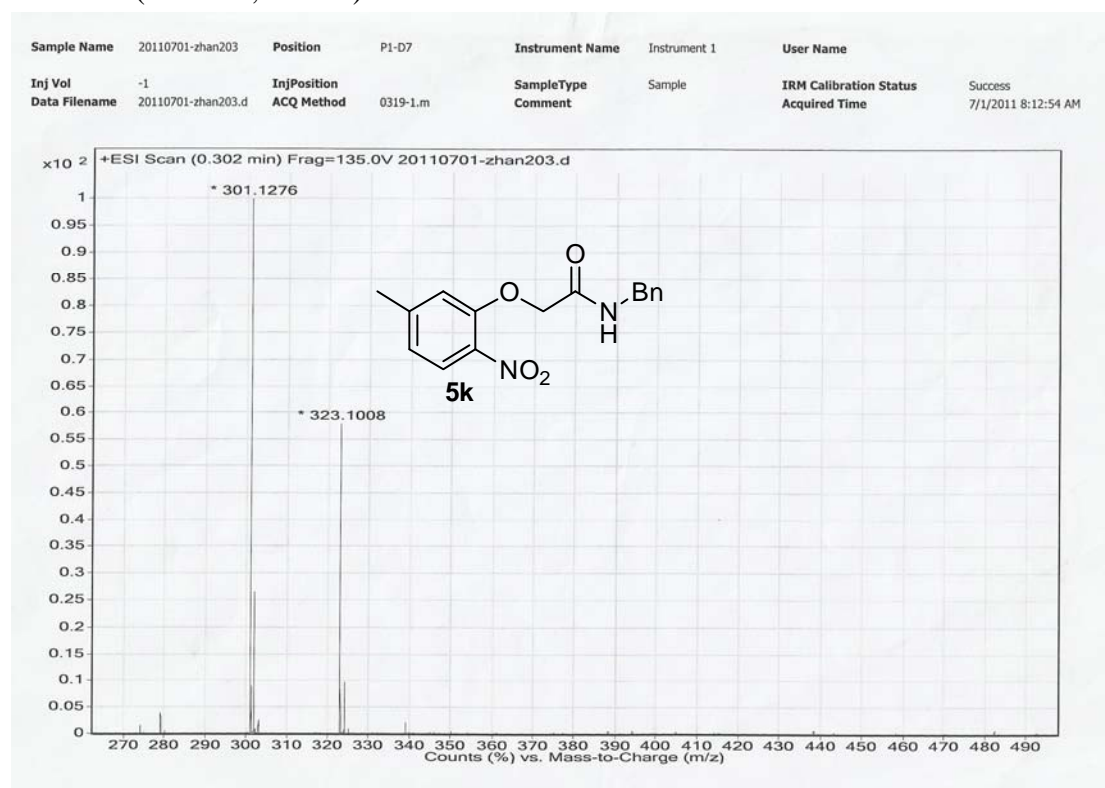

HRMS

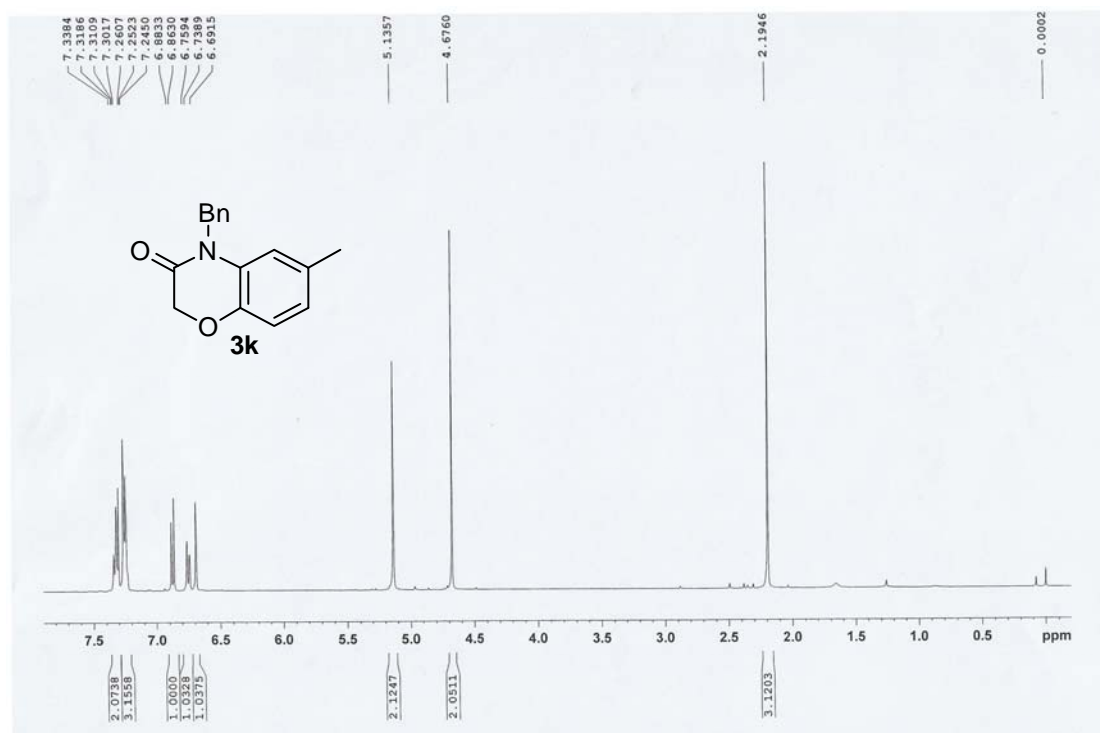

<sup>1</sup>H NMR (400 MHz, CDCl<sub>3</sub>)

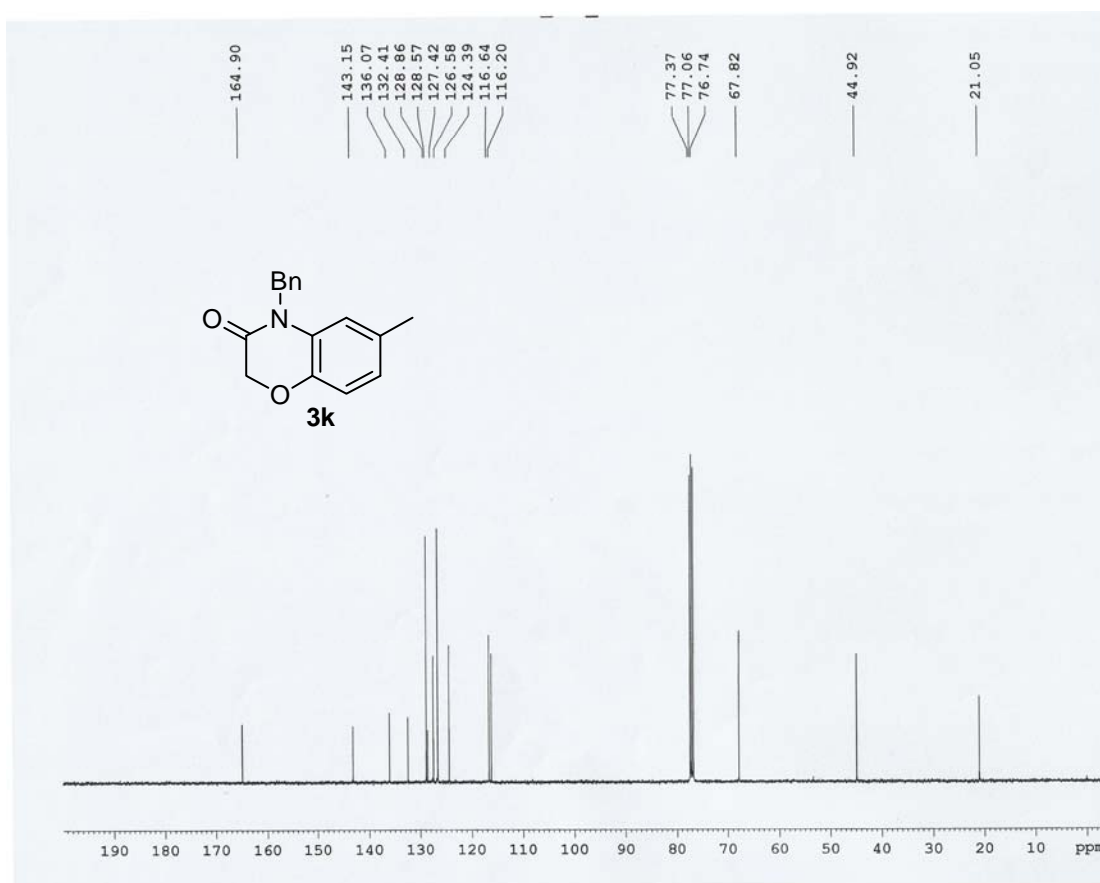

<sup>13</sup>C NMR (100 MHz, CDCl<sub>3</sub>)

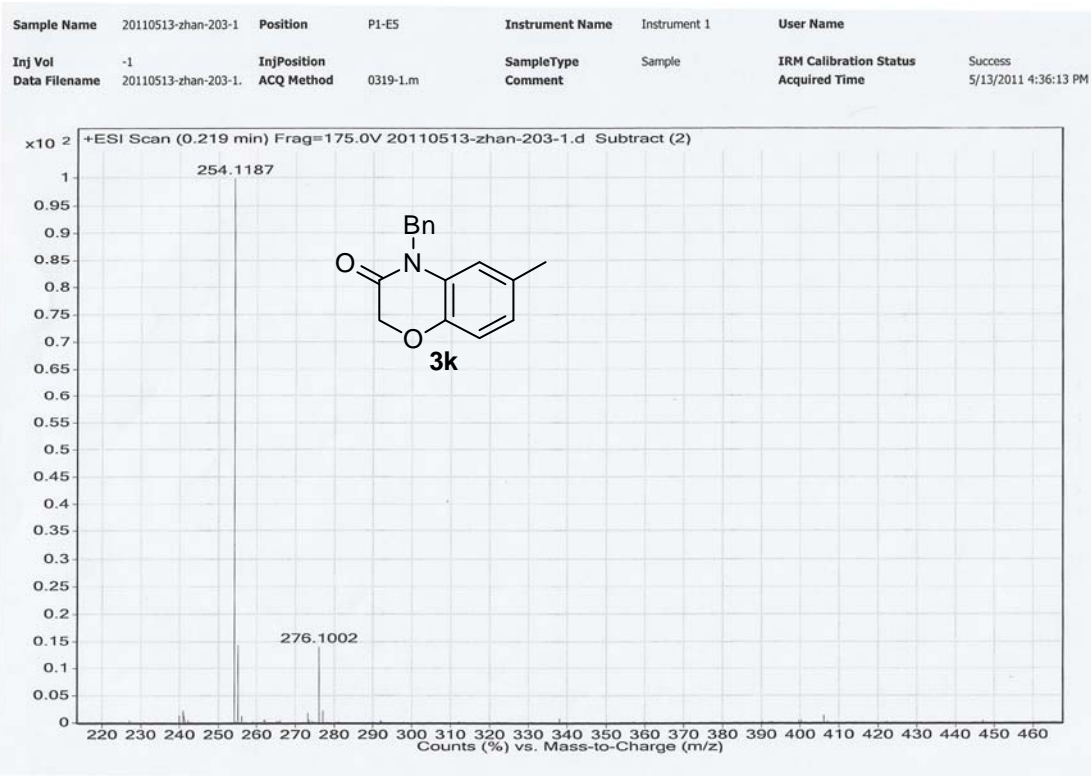

### HRMS

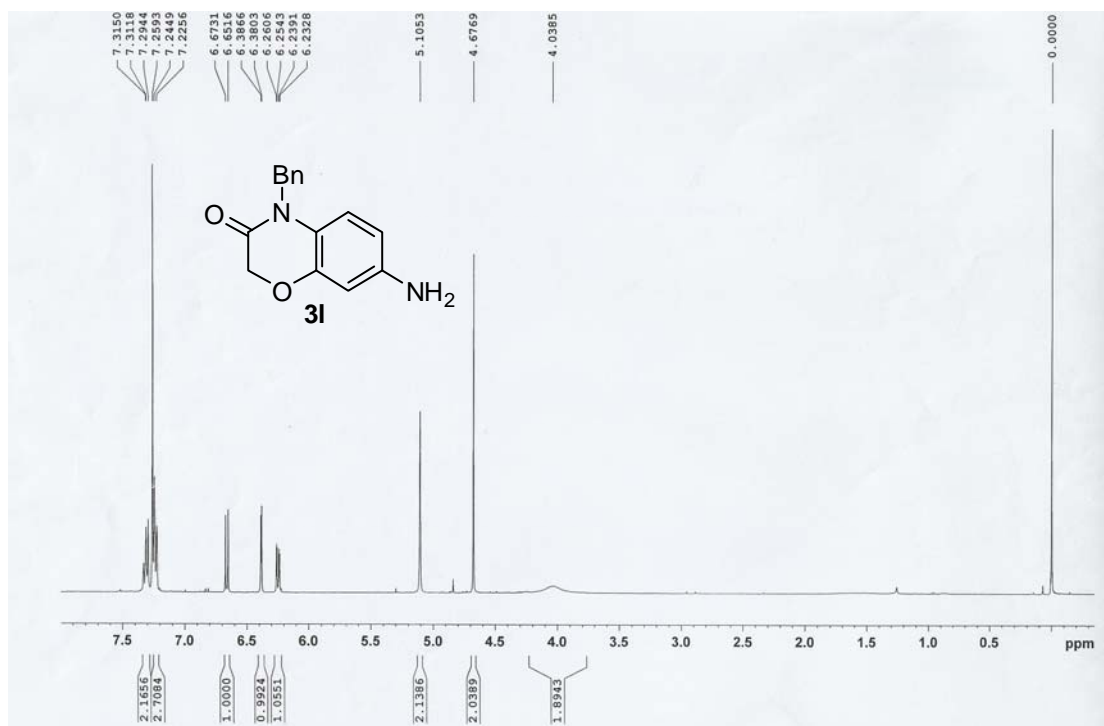

### <sup>1</sup>H NMR (400 MHz, CDCl<sub>3</sub>)

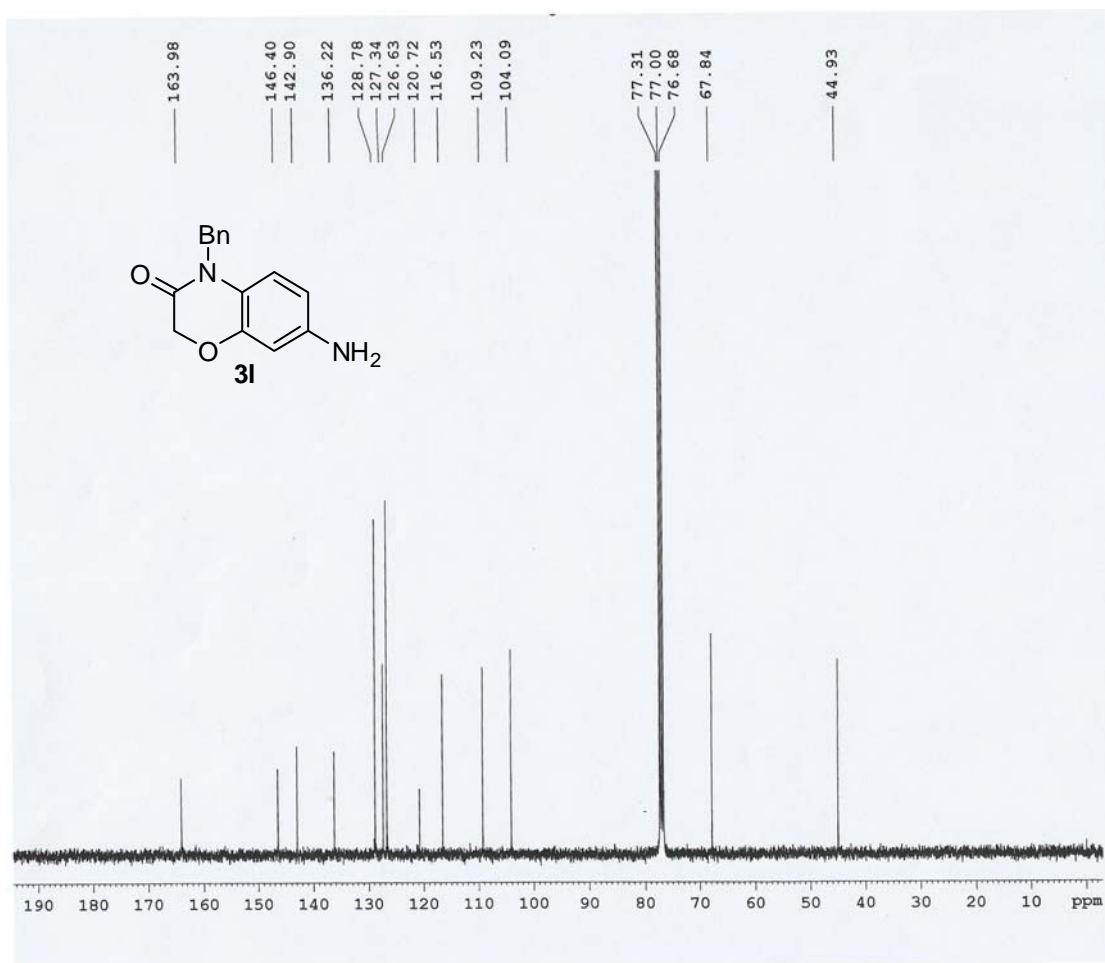

**<sup>13</sup>C NMR (100 MHz, CDCl<sub>3</sub>)**

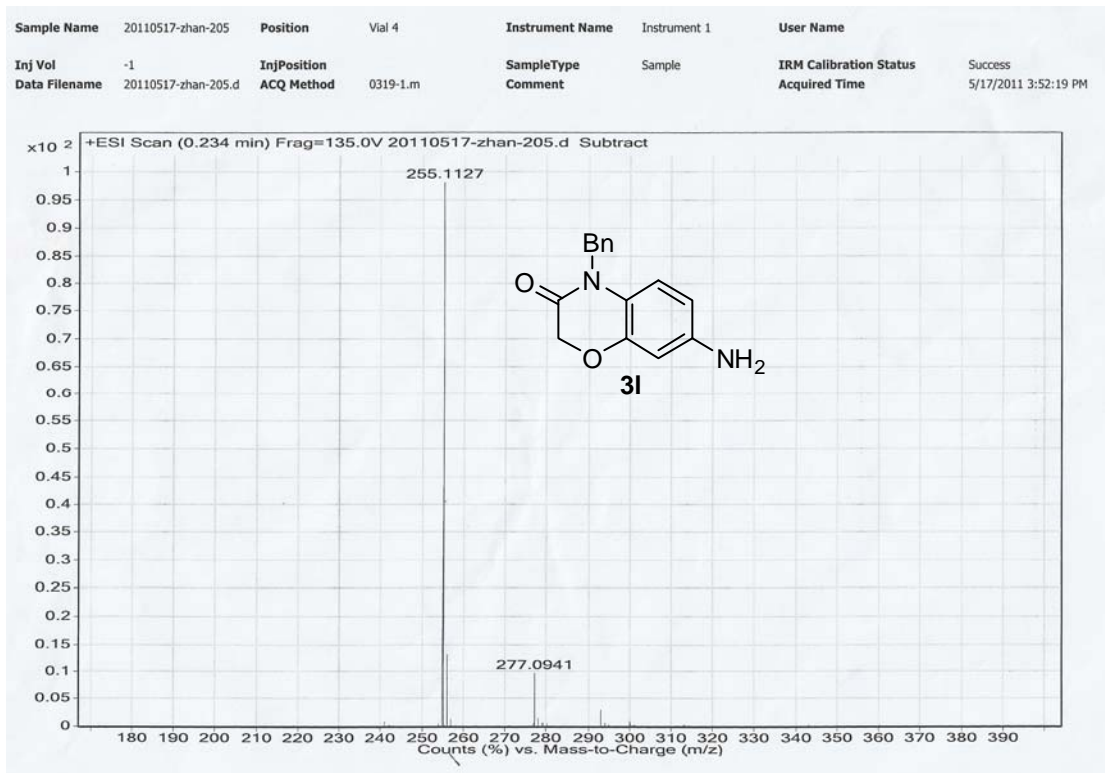

## HRMS

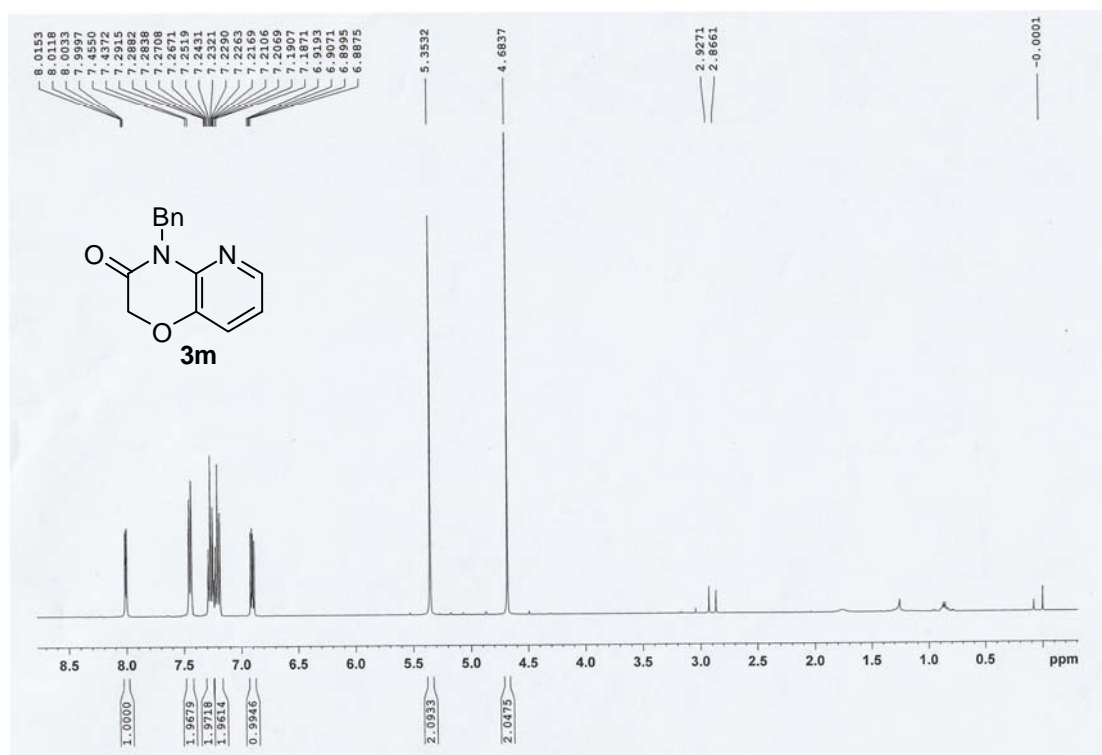

## <sup>1</sup>H NMR (400 MHz, CDCl<sub>3</sub>)

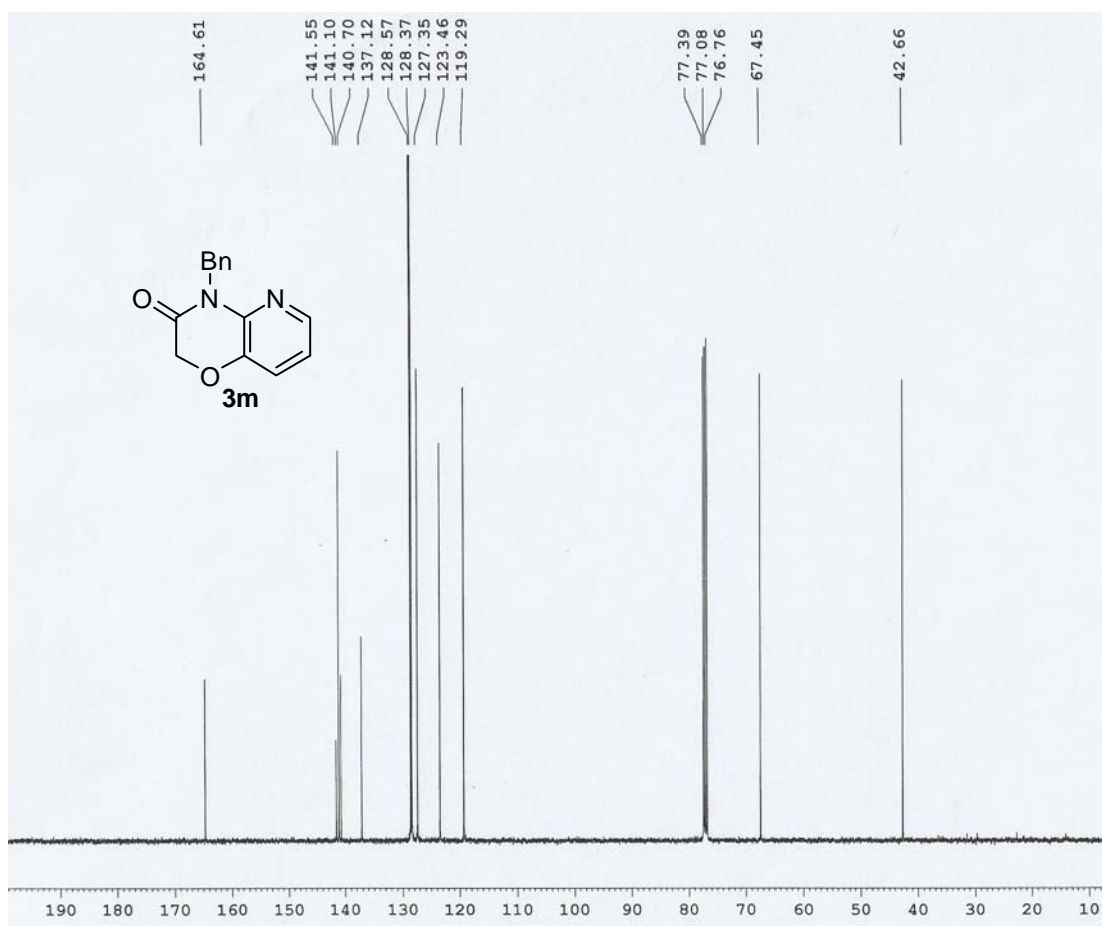

$^{13}\text{C}$  NMR(100 MHz,  $\text{CDCl}_3$ )

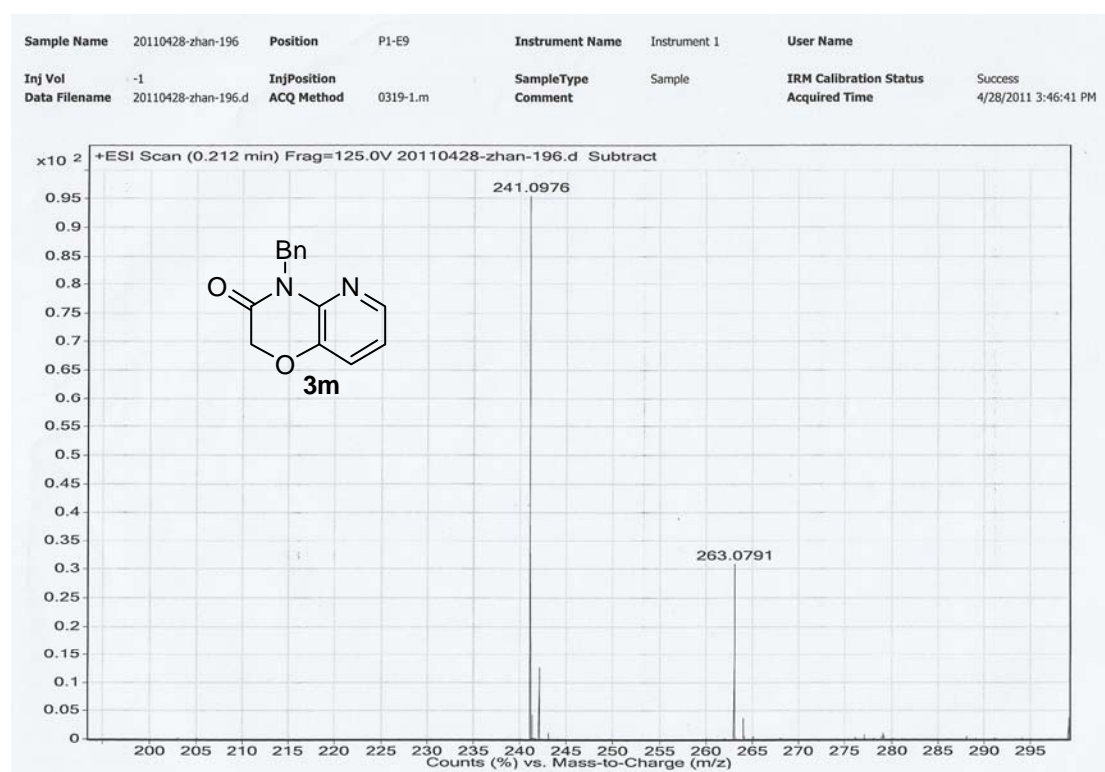

HRMS

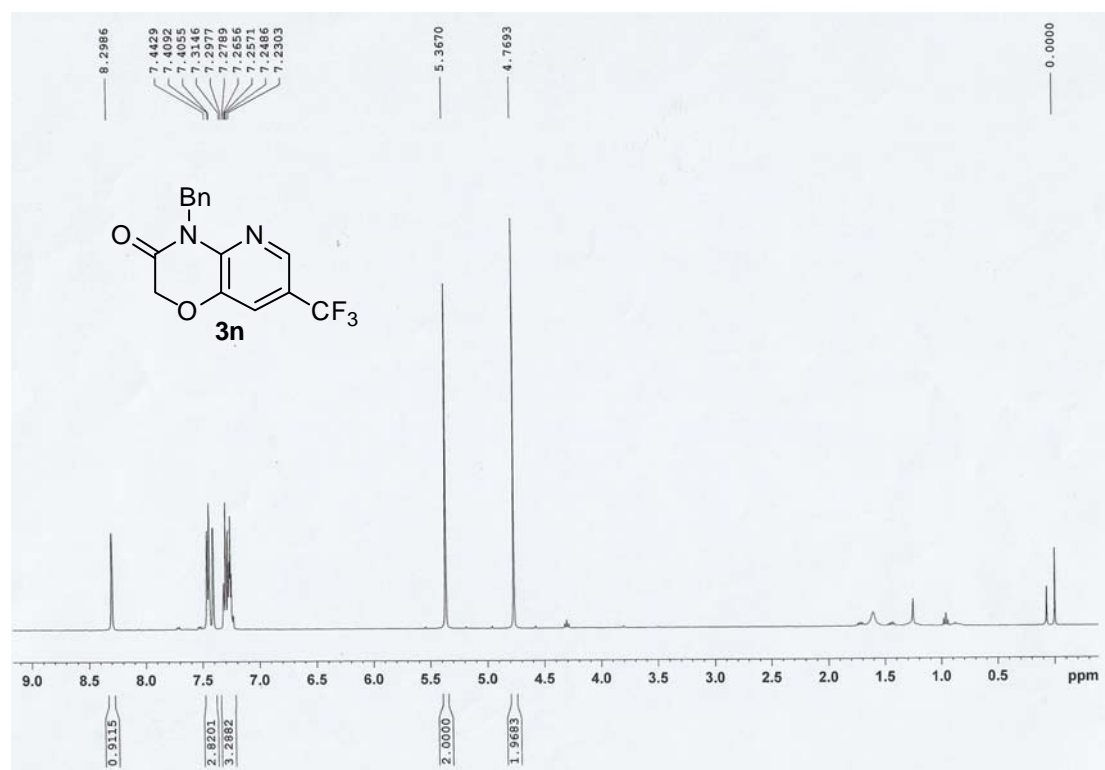

$^1\text{H}$  NMR (400 MHz,  $\text{CDCl}_3$ )

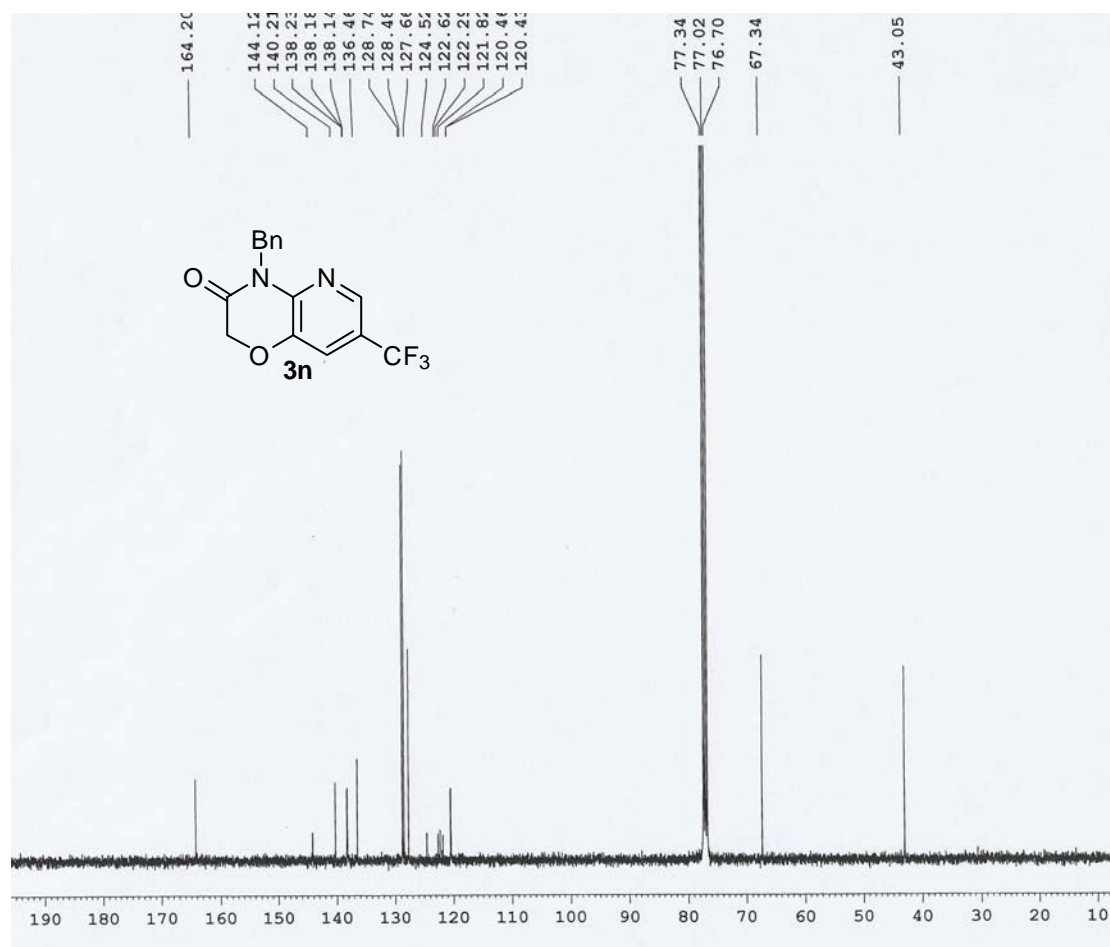

$^{13}\text{C}$  NMR(100 MHz,  $\text{CDCl}_3$ )

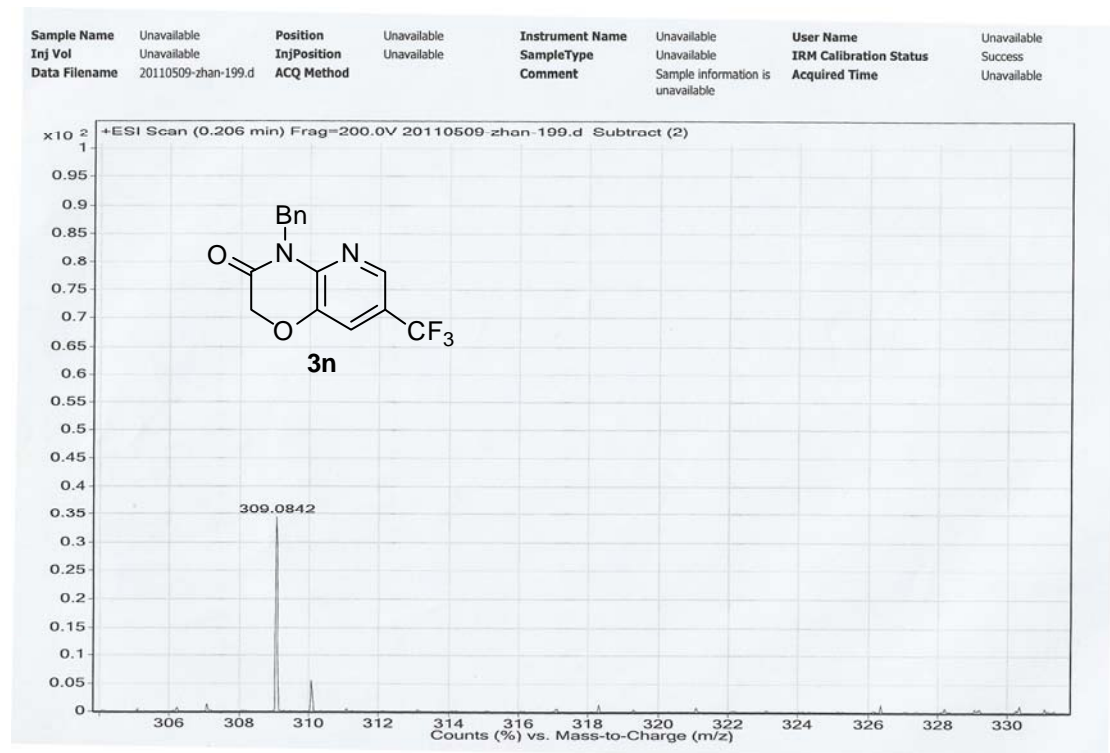

HRMS

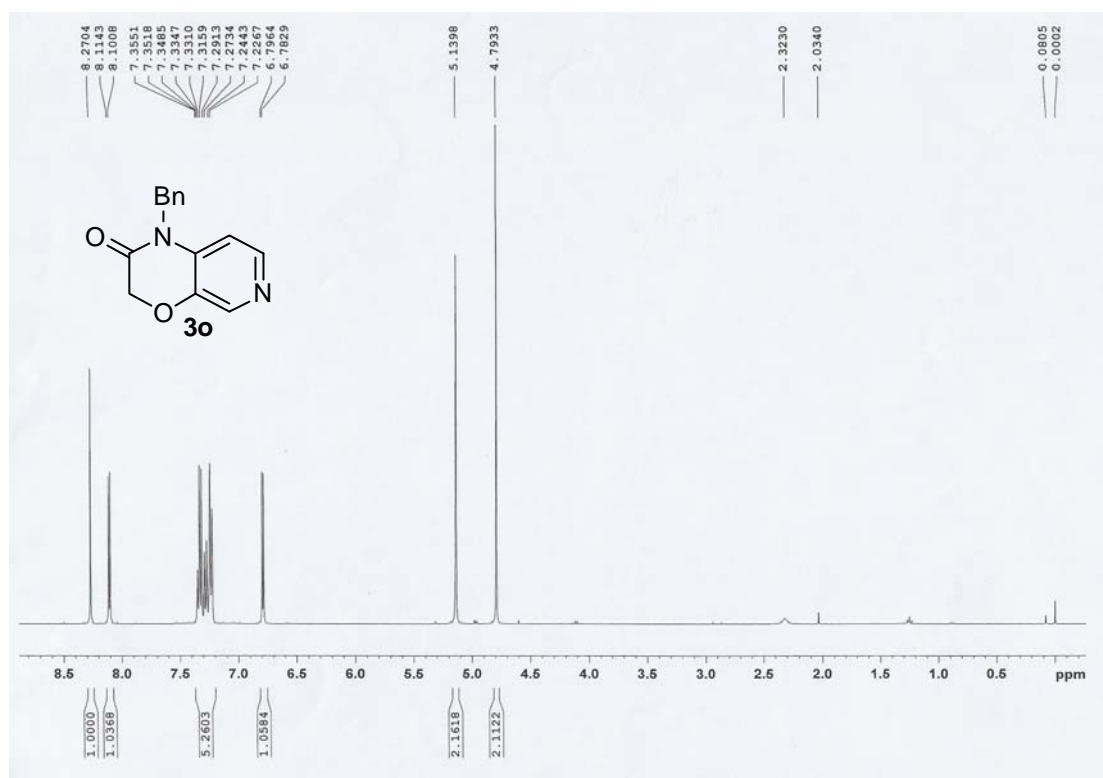

<sup>1</sup>H NMR (400 MHz, CDCl<sub>3</sub>)

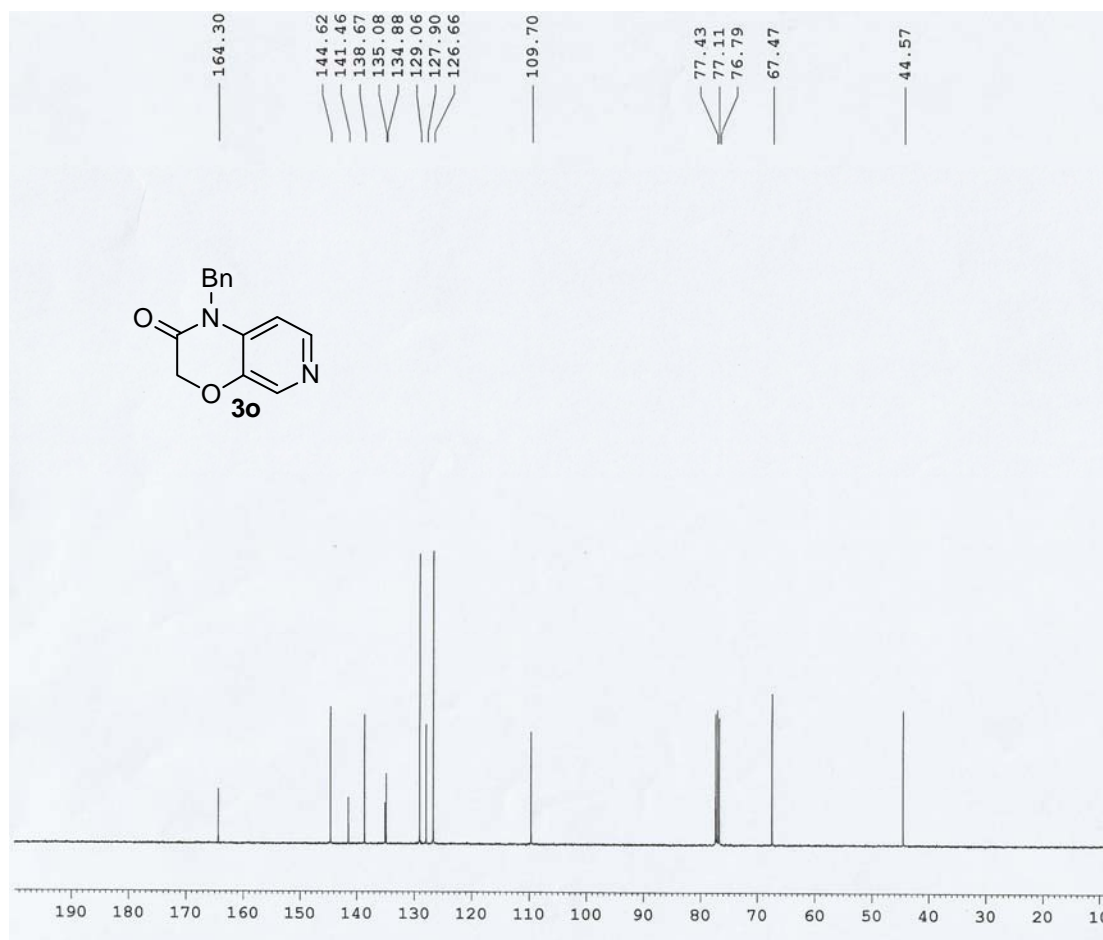



$^{13}\text{C}$  NMR(100 MHz,  $\text{CDCl}_3$ )

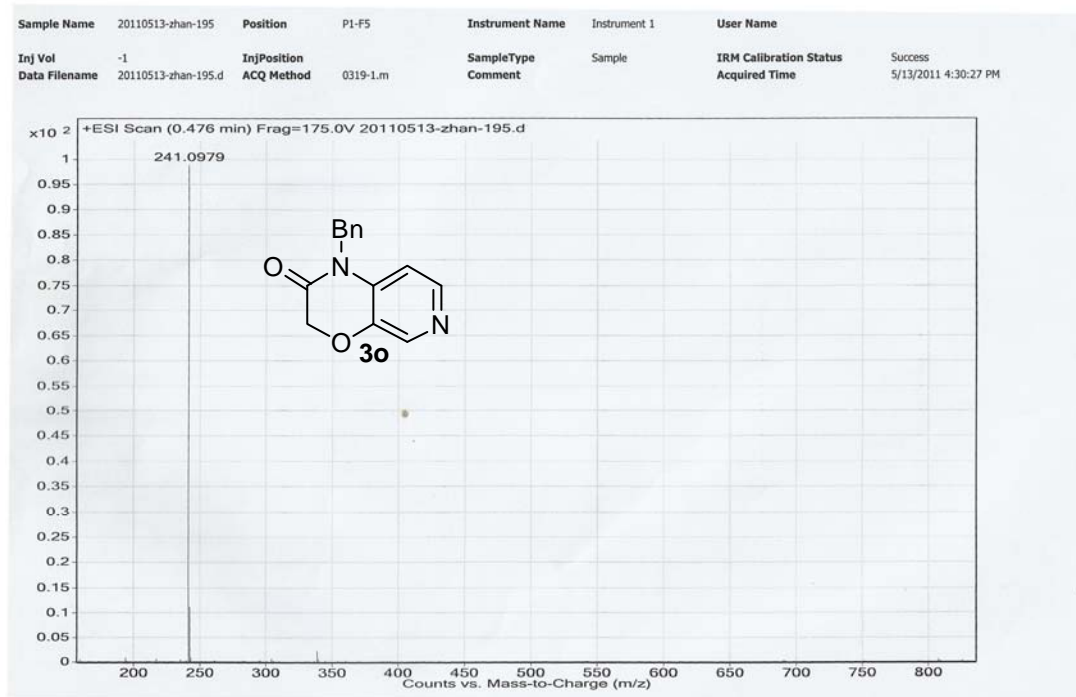

HRMS

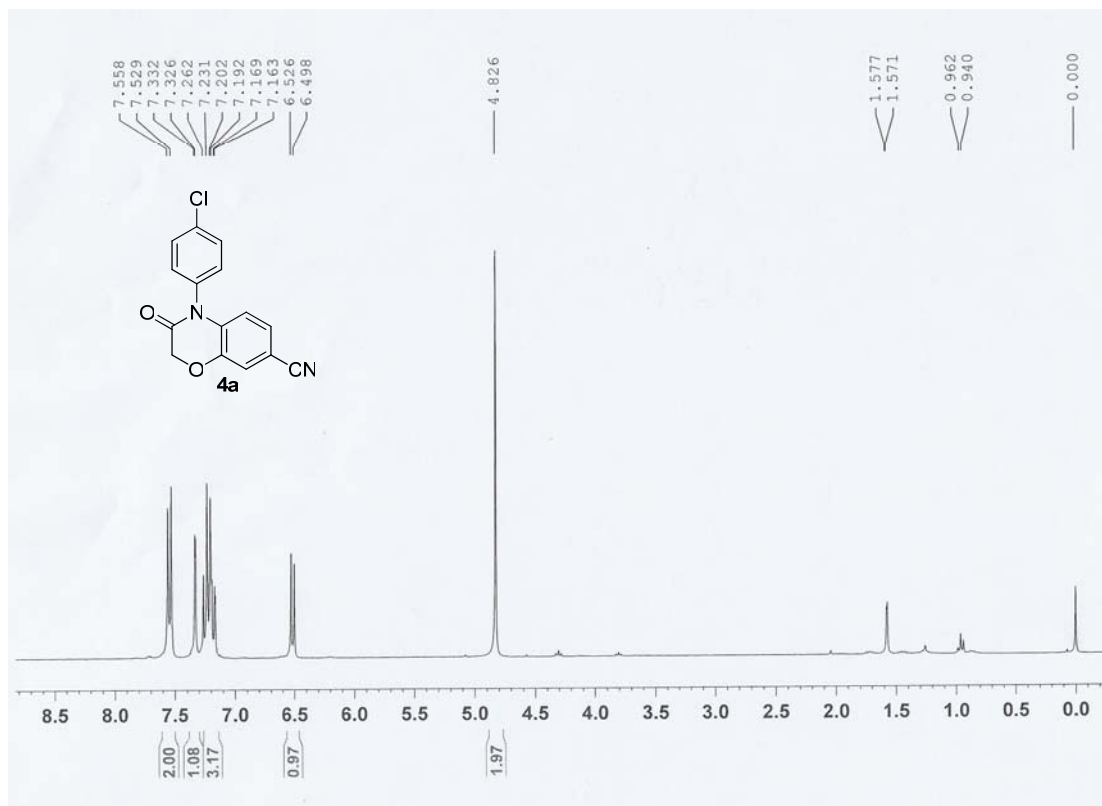

$^1\text{H}$  NMR (300 MHz,  $\text{CDCl}_3$ )

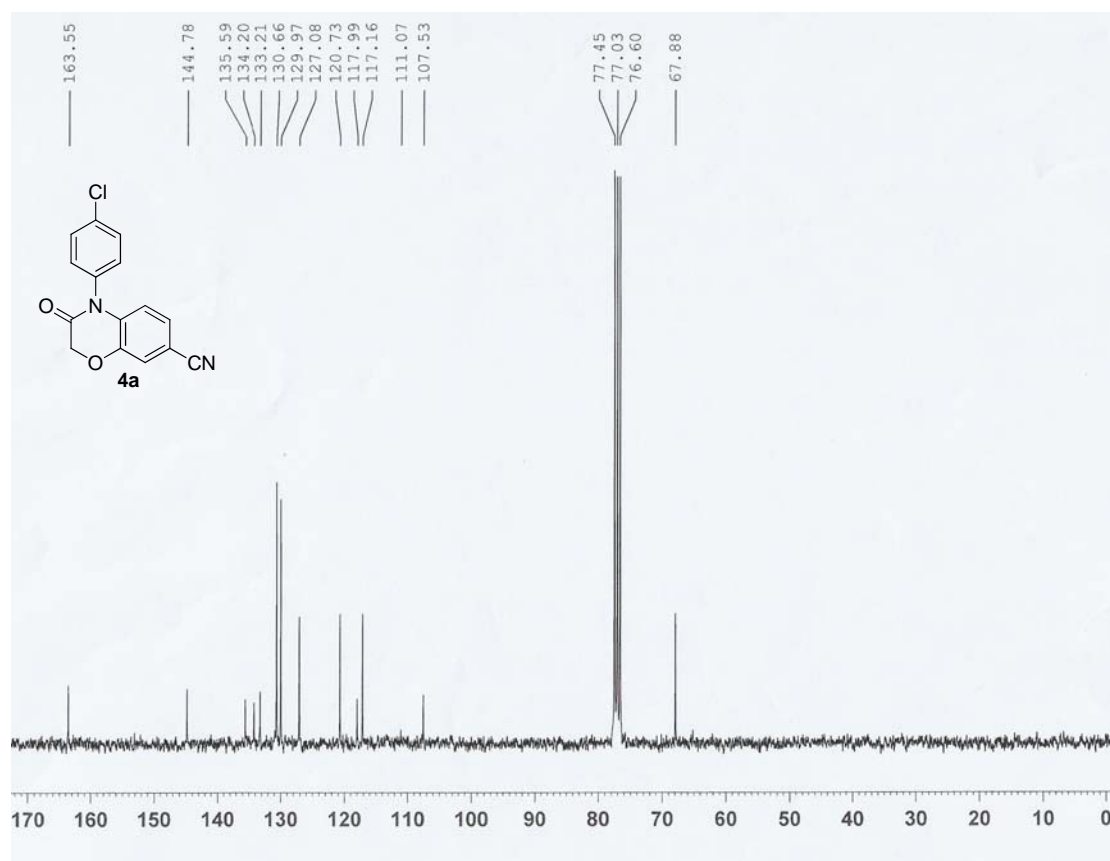

**<sup>13</sup>C NMR(75 MHz, CDCl<sub>3</sub>)**

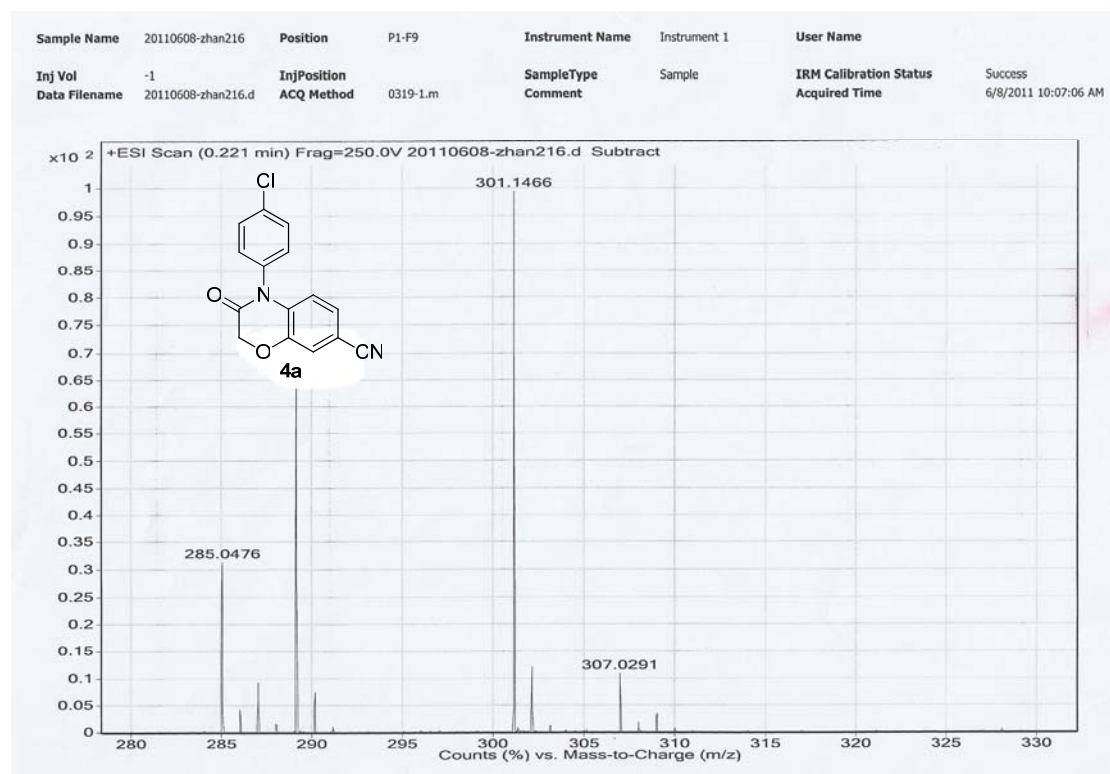

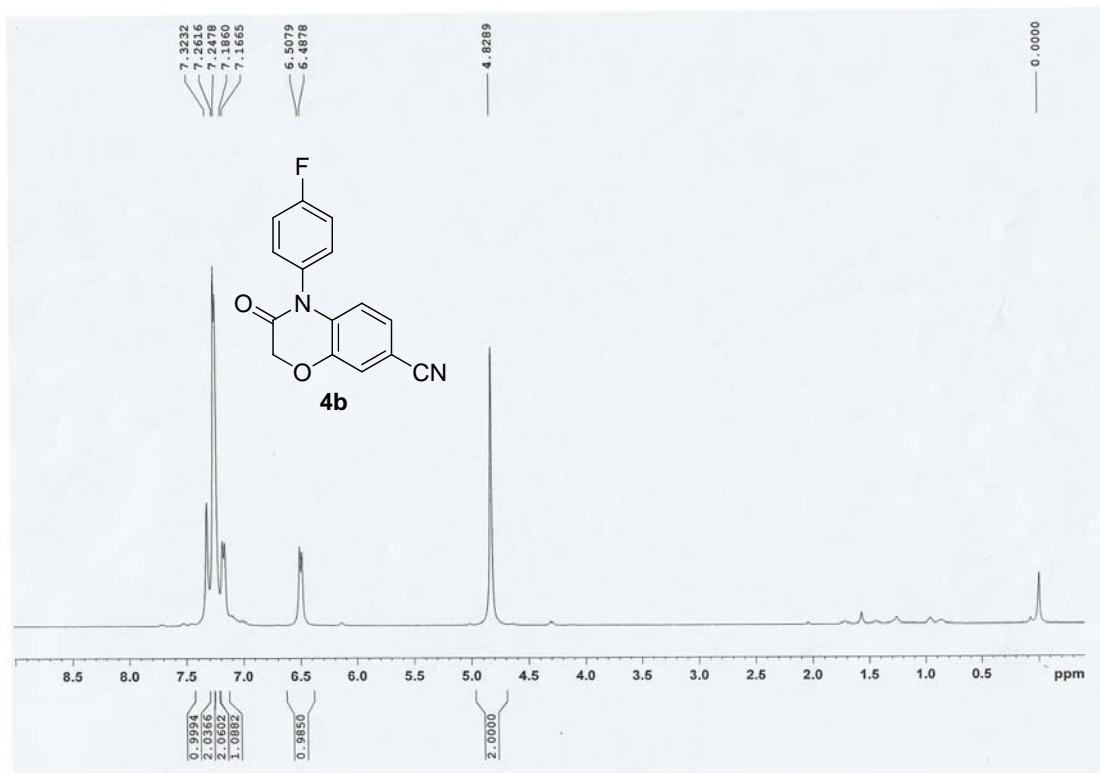

$^1\text{H NMR}$  (400 MHz,  $\text{CDCl}_3$ )

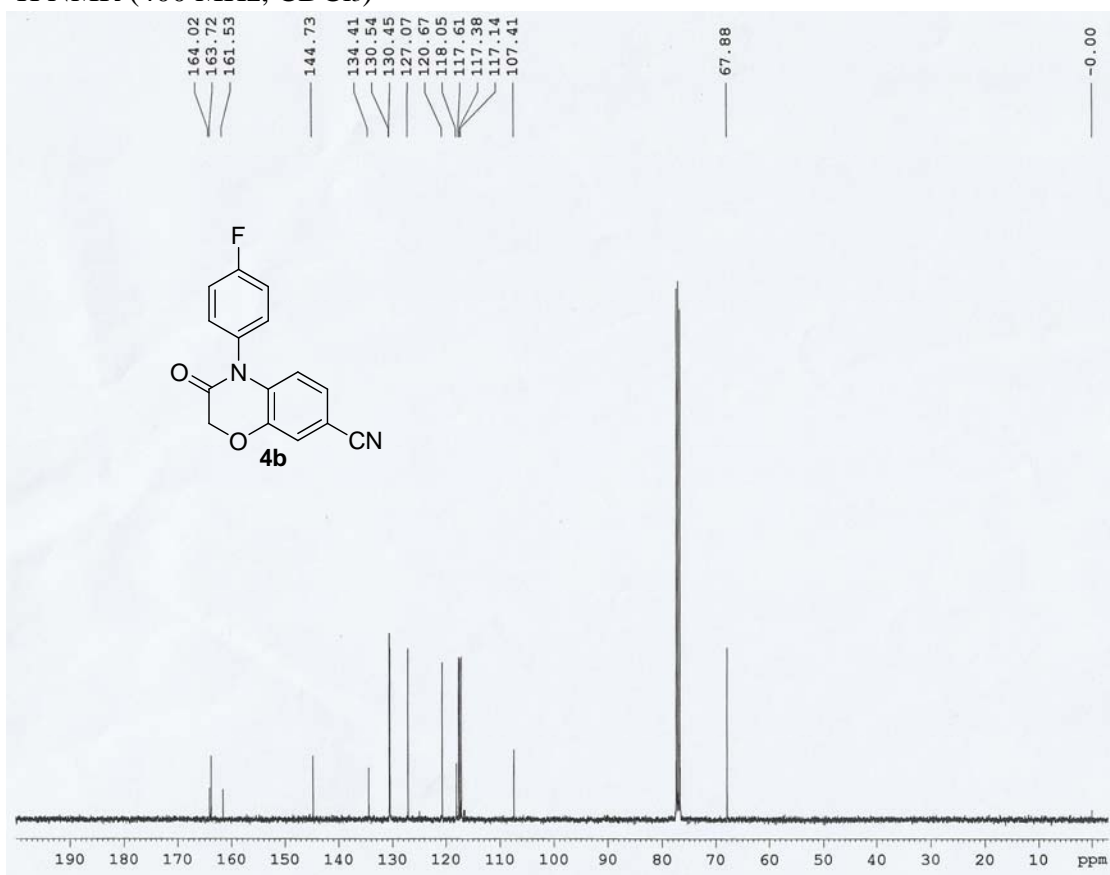

$^{13}\text{C NMR}$  (100 MHz,  $\text{CDCl}_3$ )

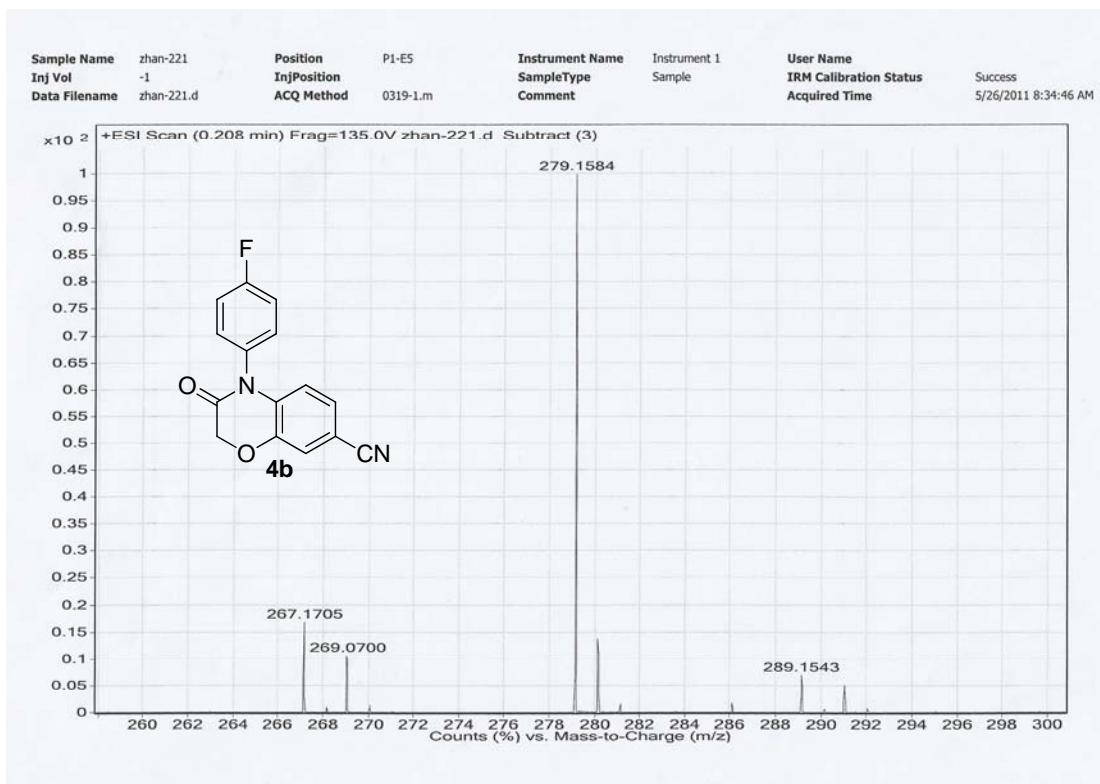

HRMS

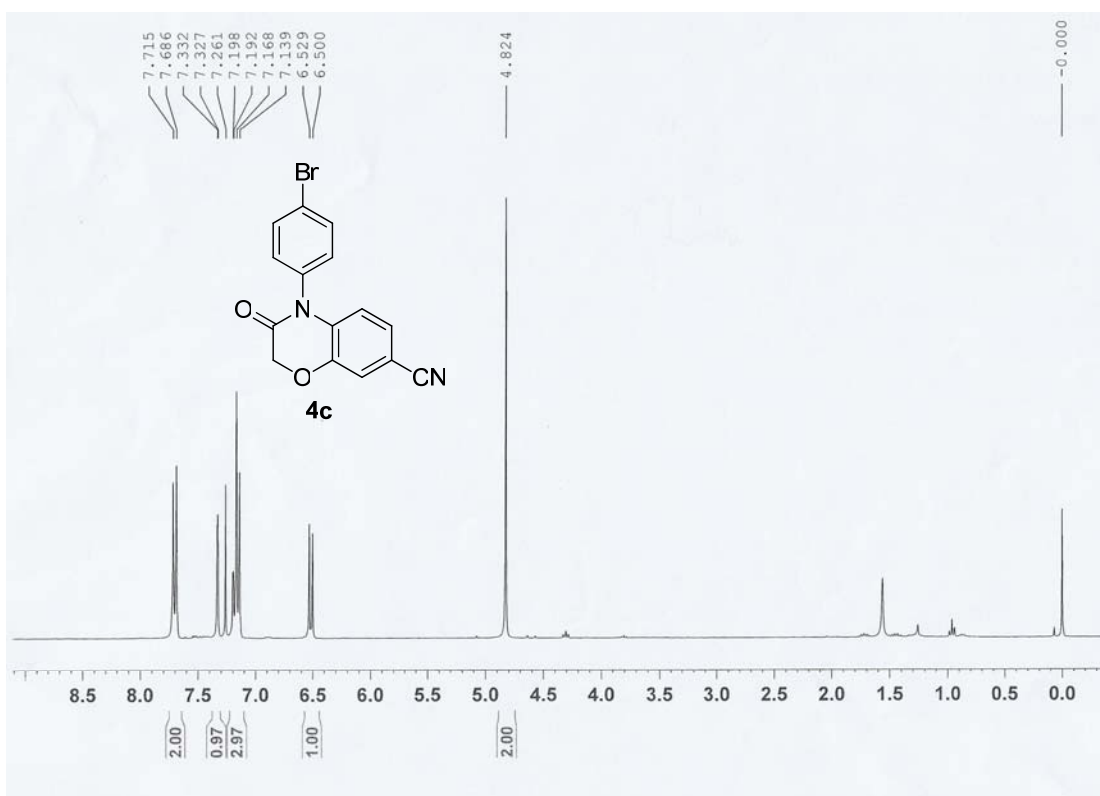

$^1\text{H}$  NMR (300 MHz,  $\text{CDCl}_3$ )

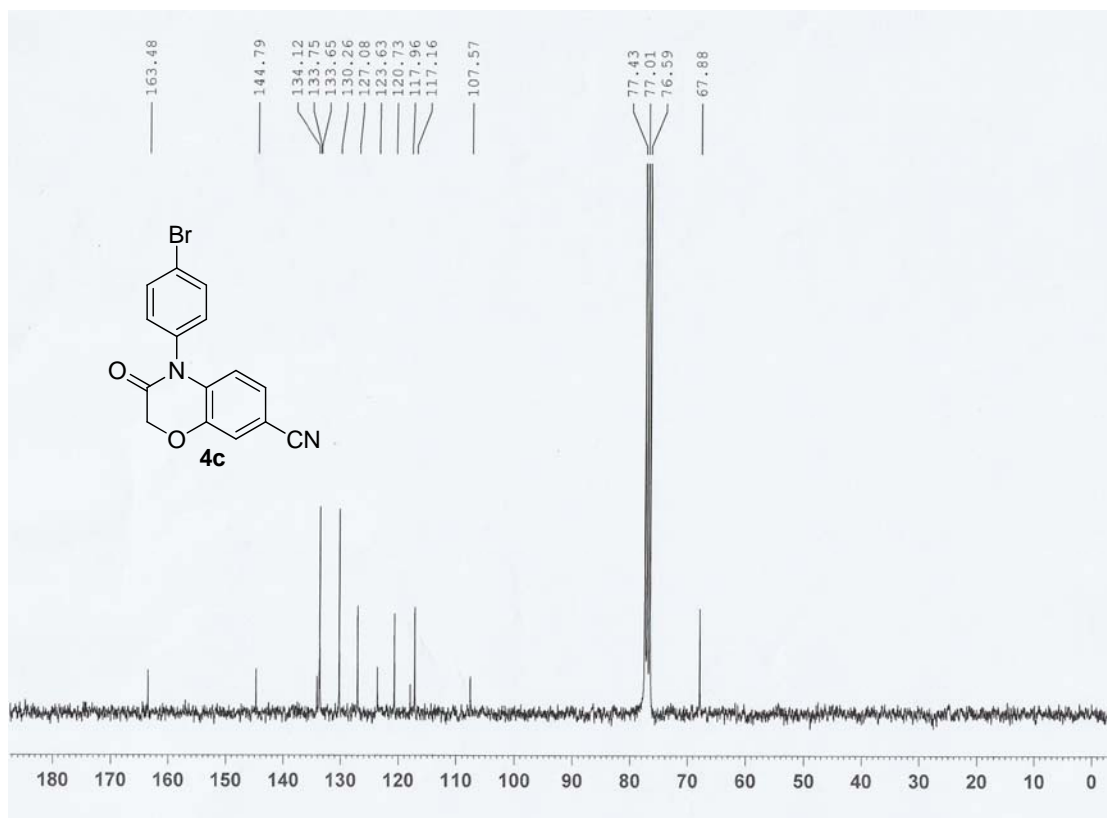

$^{13}\text{C}$  NMR(75 MHz,  $\text{CDCl}_3$ )

| Sample Name   | 20110608-zhan220   | Position    | PI-E9    | Instrument Name | Instrument 1 | User Name              |                      |
|---------------|--------------------|-------------|----------|-----------------|--------------|------------------------|----------------------|
| Inj Vol       | -1                 | InjPosition |          | SampleType      | Sample       | IRM Calibration Status | Success              |
| Data Filename | 20110608-zhan220.d | ACQ Method  | 0319-1.m | Comment         |              | Acquired Time          | 6/8/2011 10:08:24 AM |

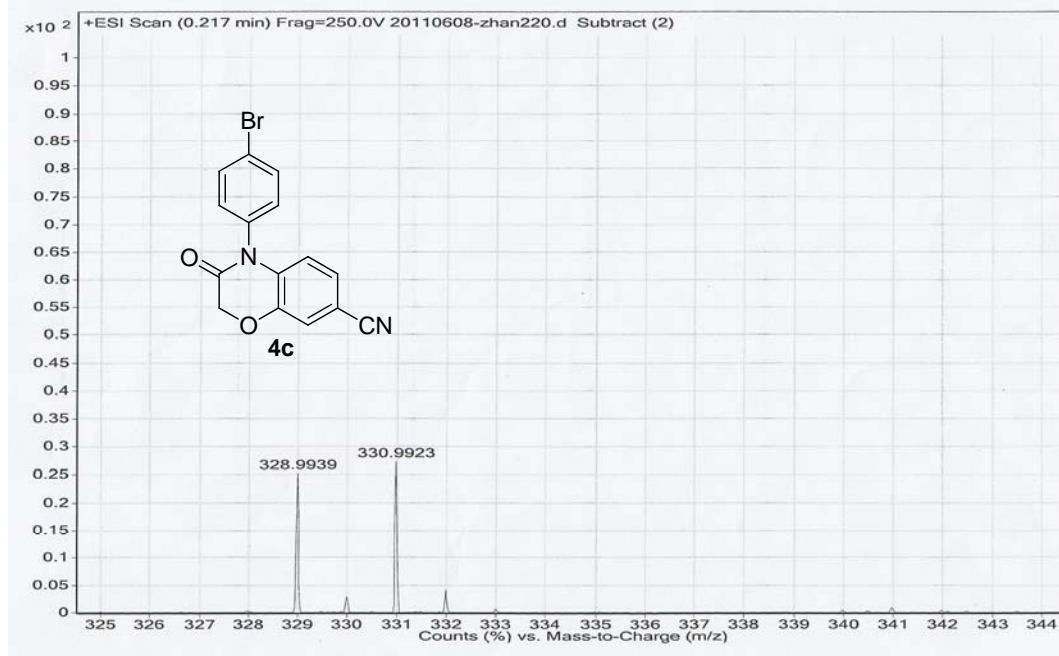

HRMS

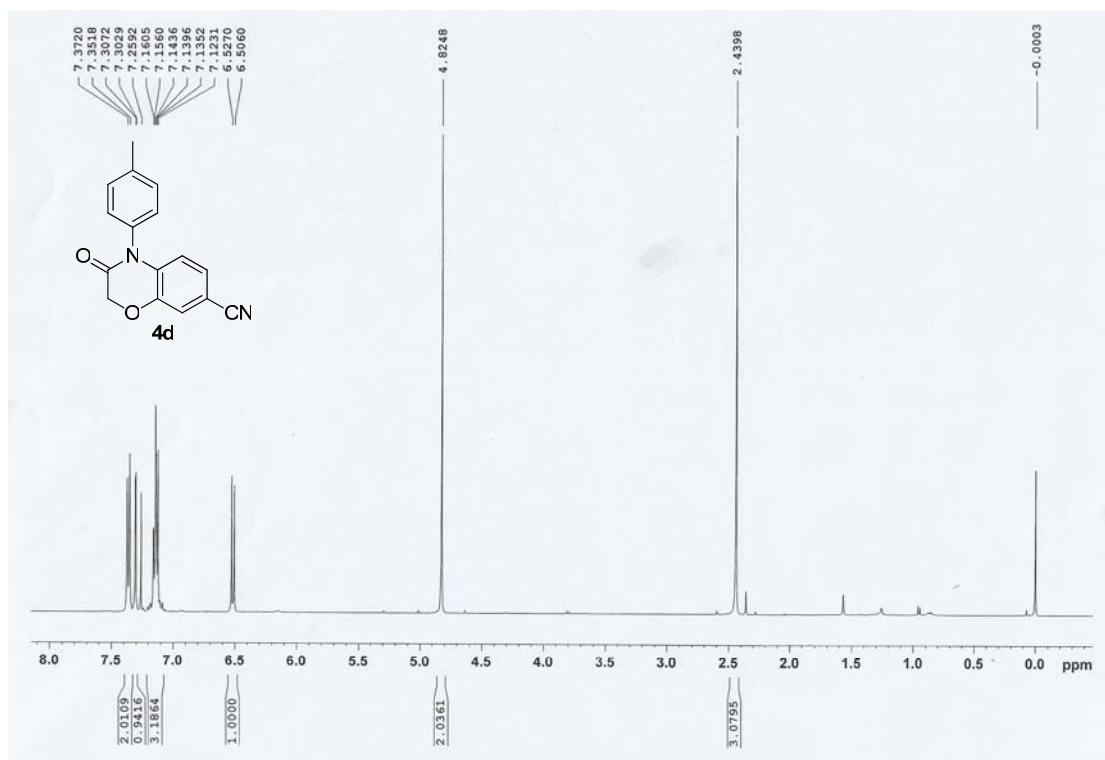

$^1\text{H}$  NMR (400 MHz,  $\text{CDCl}_3$ )

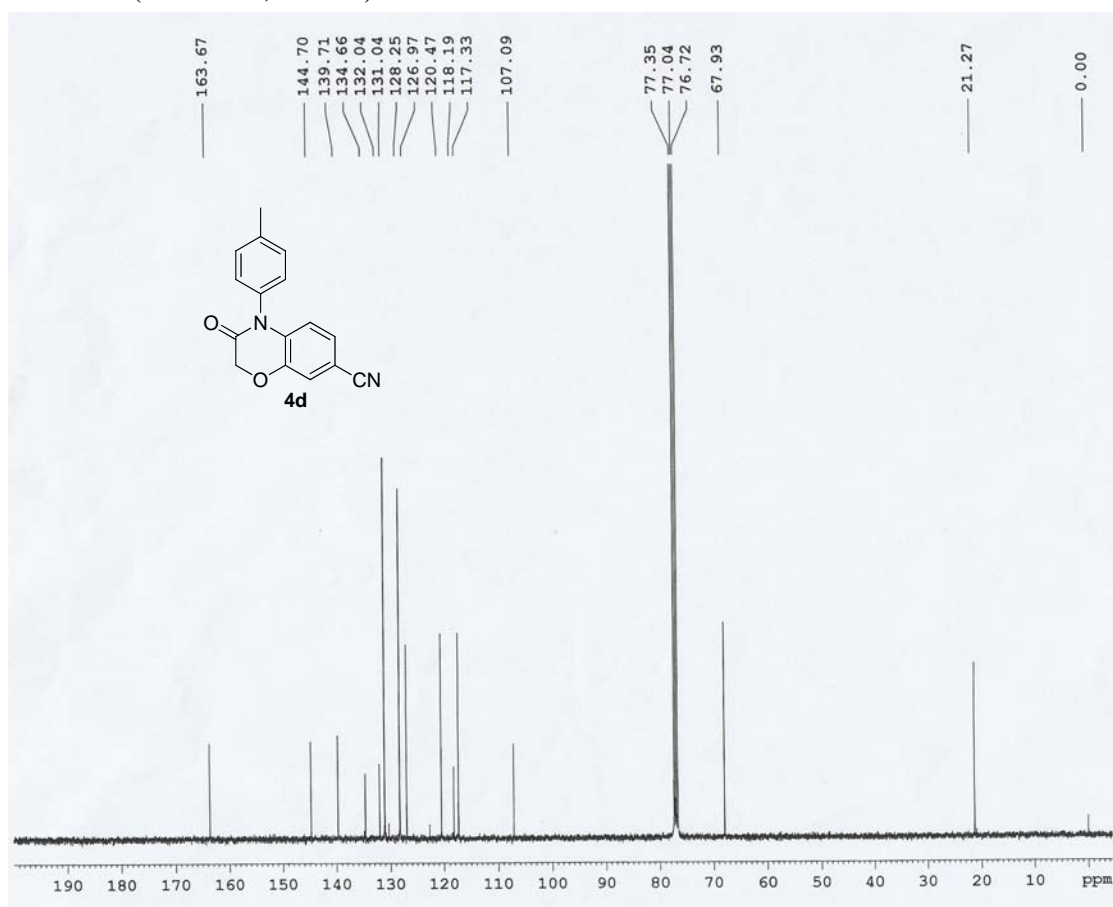

$^{13}\text{C}$  NMR (100 MHz,  $\text{CDCl}_3$ )

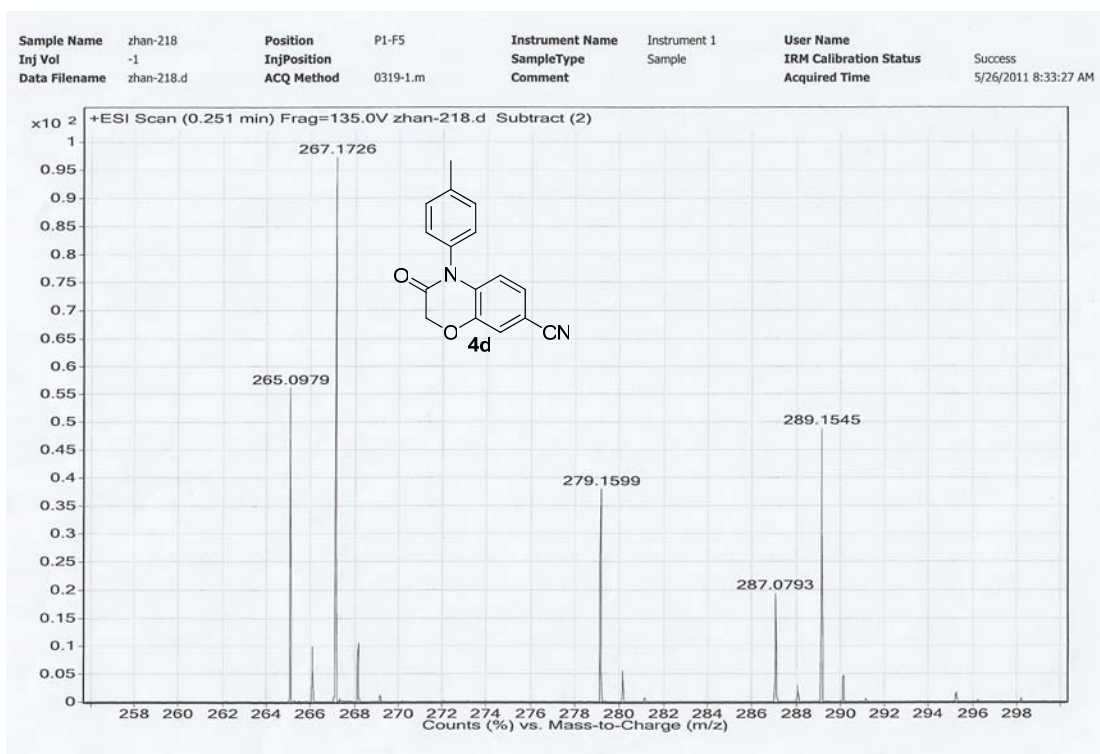

### HRMS

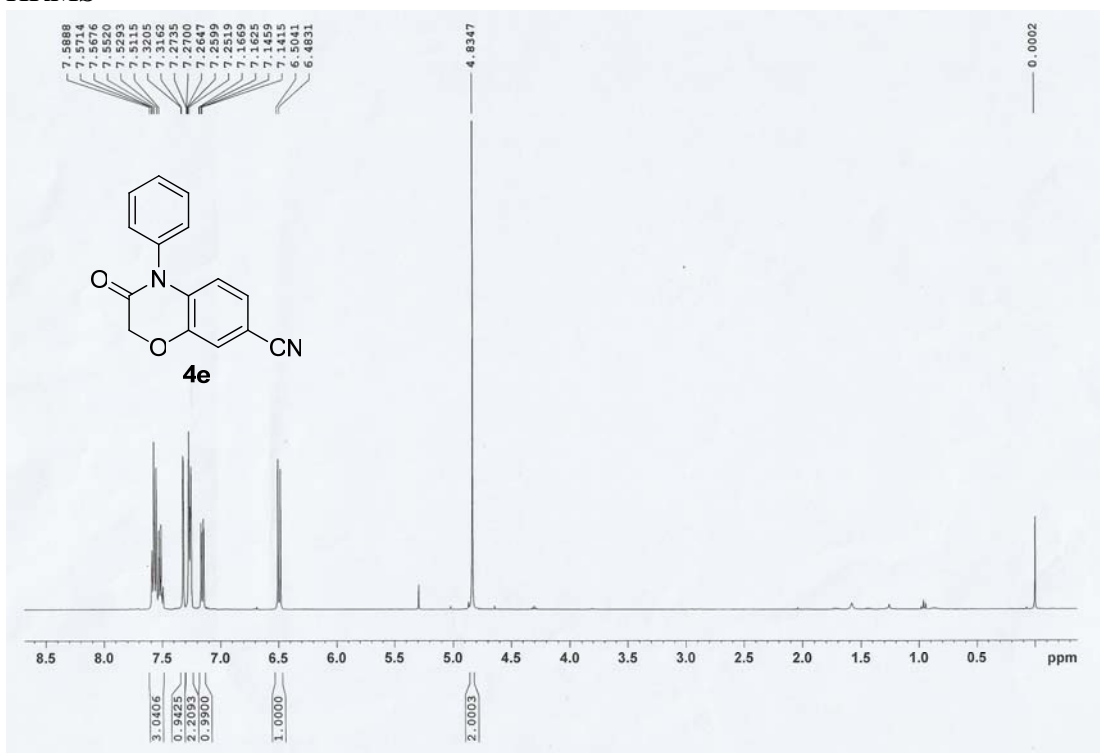

<sup>1</sup>H NMR (400 MHz, CDCl<sub>3</sub>)

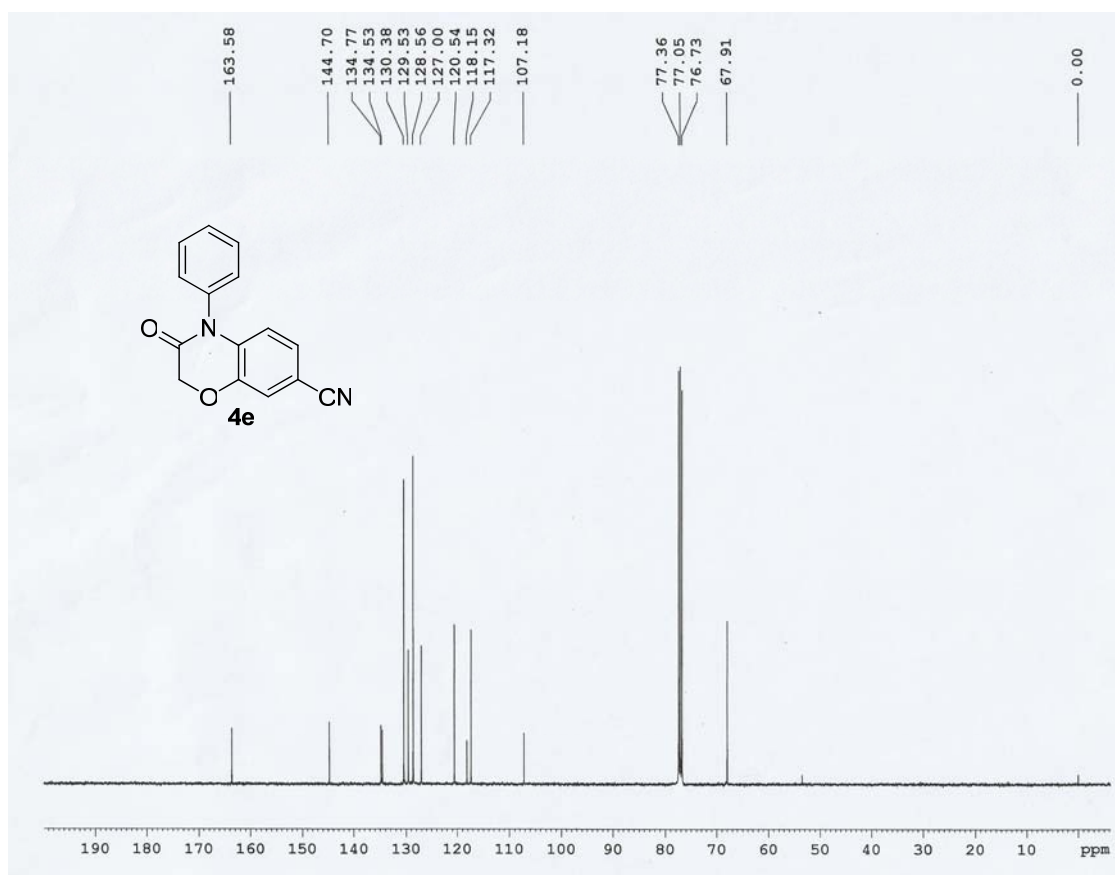

$^{13}\text{C}$  NMR(100 MHz,  $\text{CDCl}_3$ )

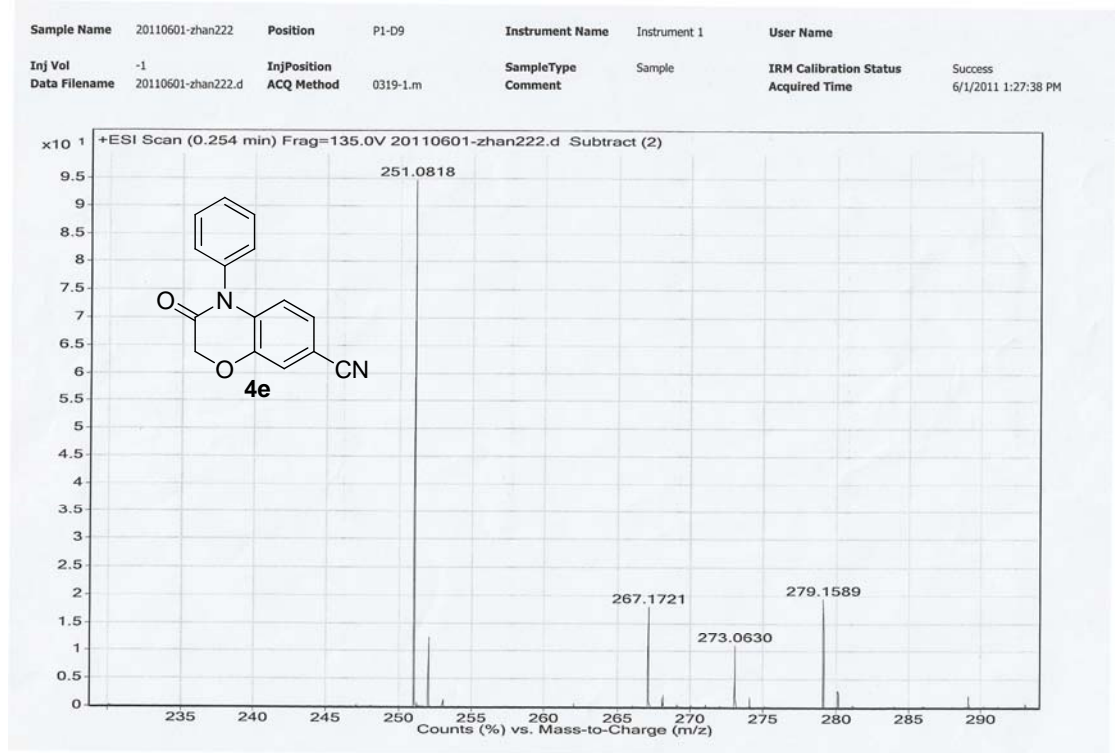

HRMS



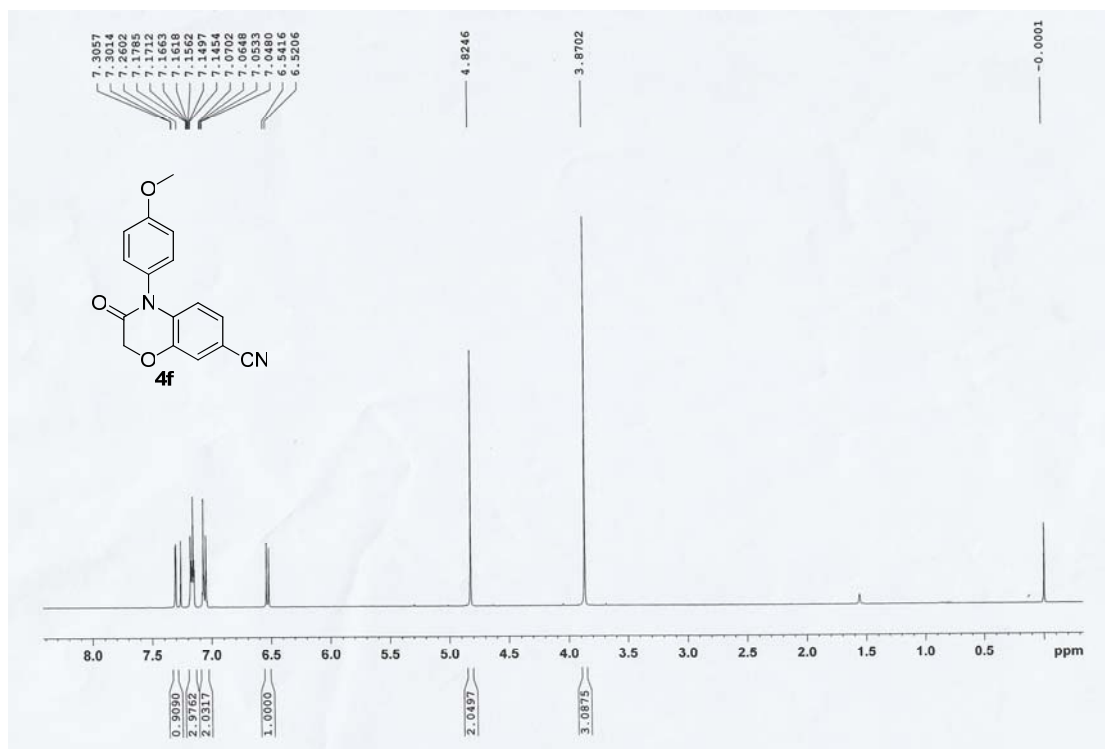

<sup>1</sup>H NMR (400 MHz, CDCl<sub>3</sub>)

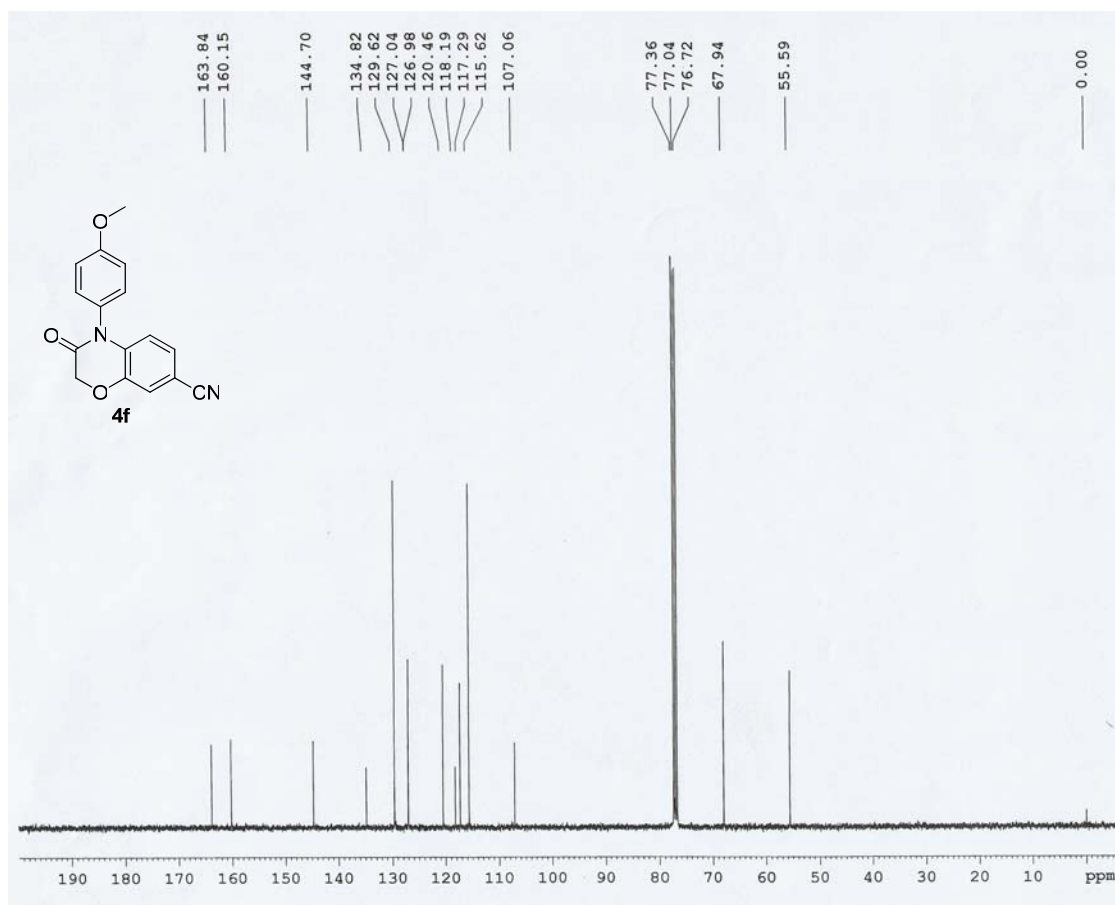

<sup>13</sup>C NMR (100 MHz, CDCl<sub>3</sub>)

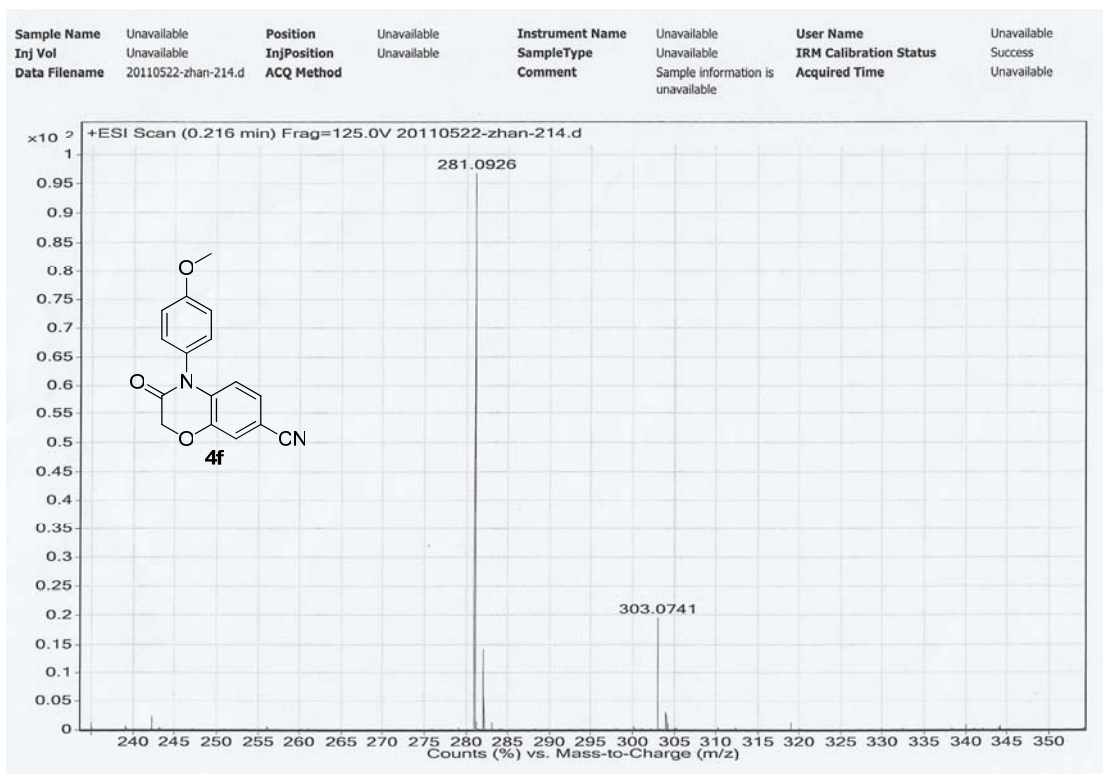

### HRMS

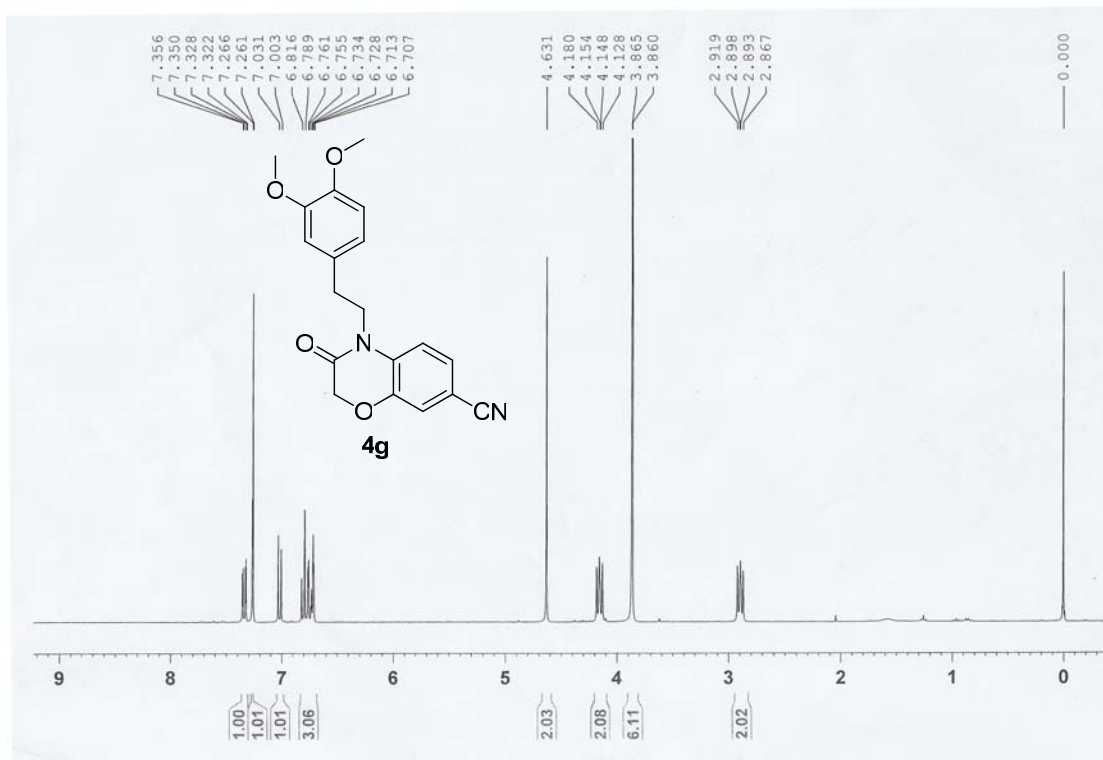

### <sup>1</sup>H NMR (300 MHz, CDCl<sub>3</sub>)

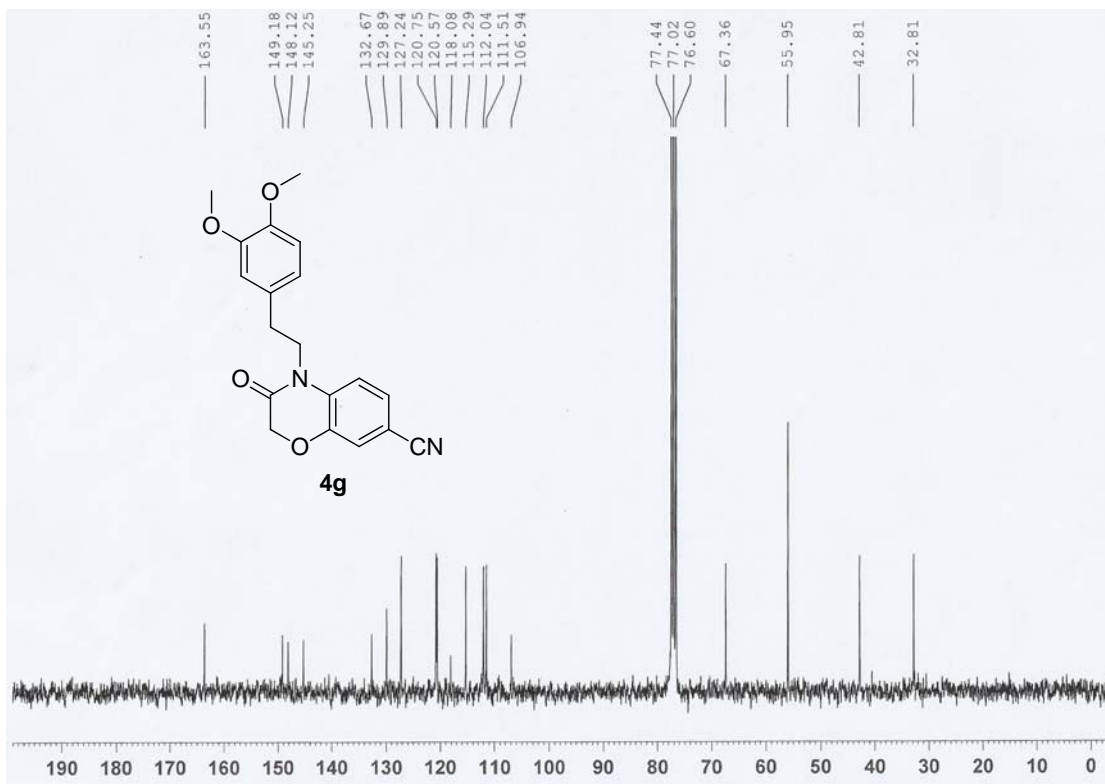

$^{13}\text{C}$  NMR (75 MHz,  $\text{CDCl}_3$ )

| Sample Name   | 20110608-zhan-226   | Position    | P1-E9    | Instrument Name | Instrument 1 | User Name              |                      |
|---------------|---------------------|-------------|----------|-----------------|--------------|------------------------|----------------------|
| Inj Vol       | -1                  | InjPosition |          | SampleType      | Sample       | IRM Calibration Status | Success              |
| Data Filename | 20110608-zhan-226.d | ACQ Method  | 0319-1.m | Comment         |              | Acquired Time          | 6/8/2011 11:24:07 AM |

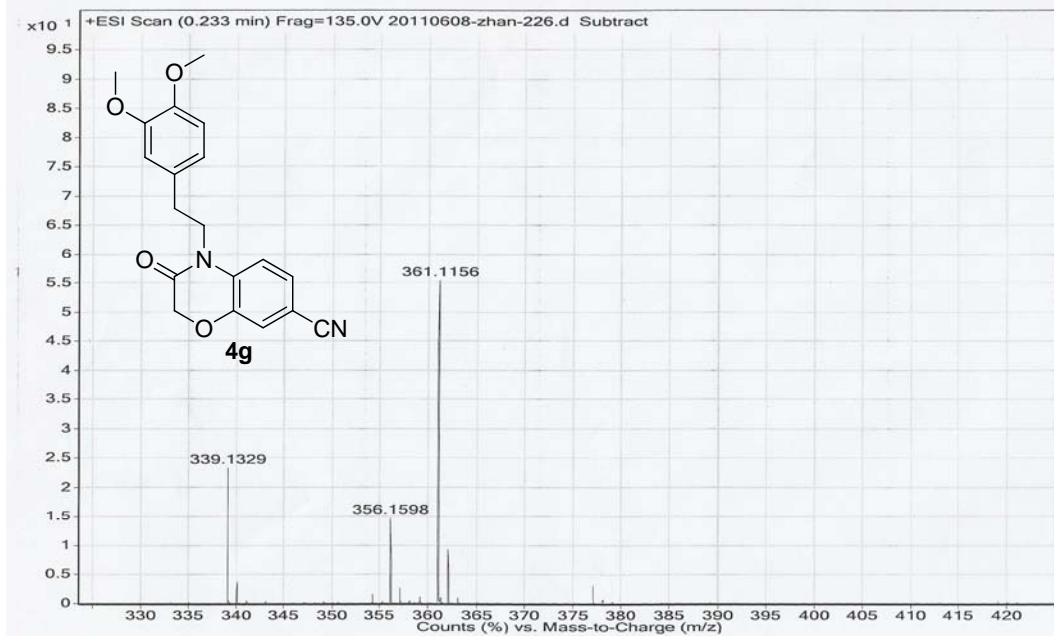

HRMS

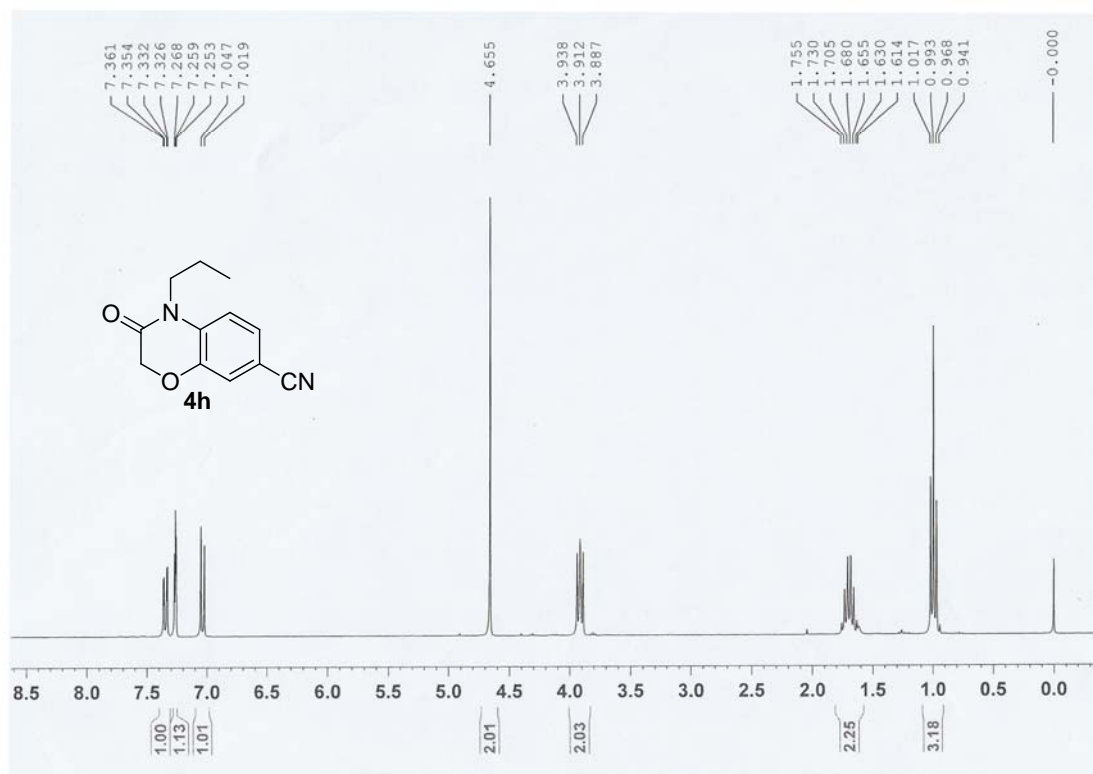

**<sup>1</sup>H NMR (300 MHz, CDCl<sub>3</sub>)**

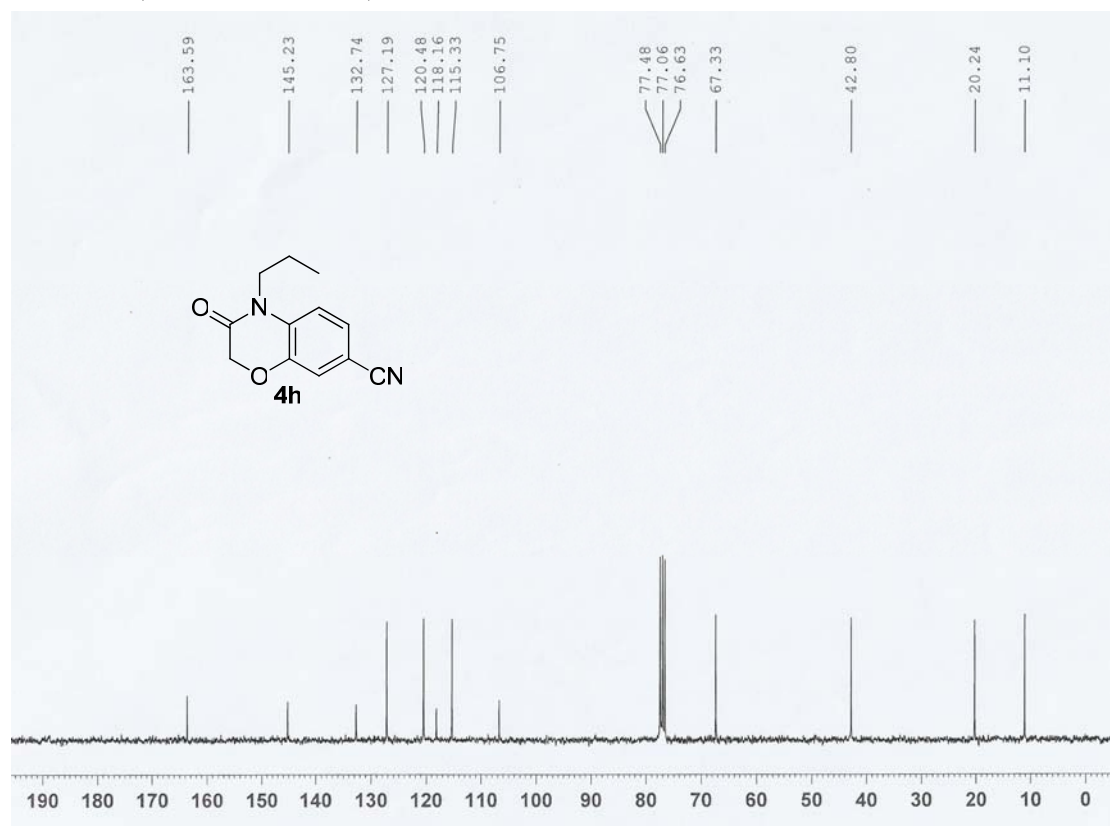

**<sup>13</sup>C NMR (75 MHz, CDCl<sub>3</sub>)**

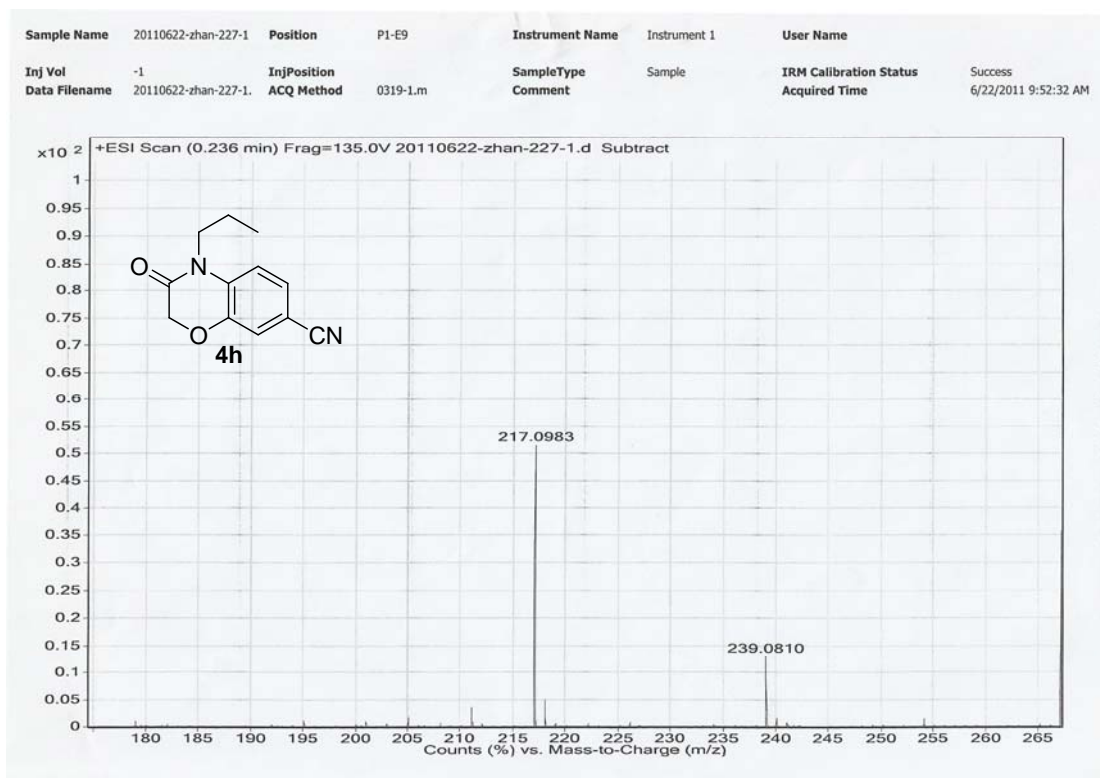

### HRMS

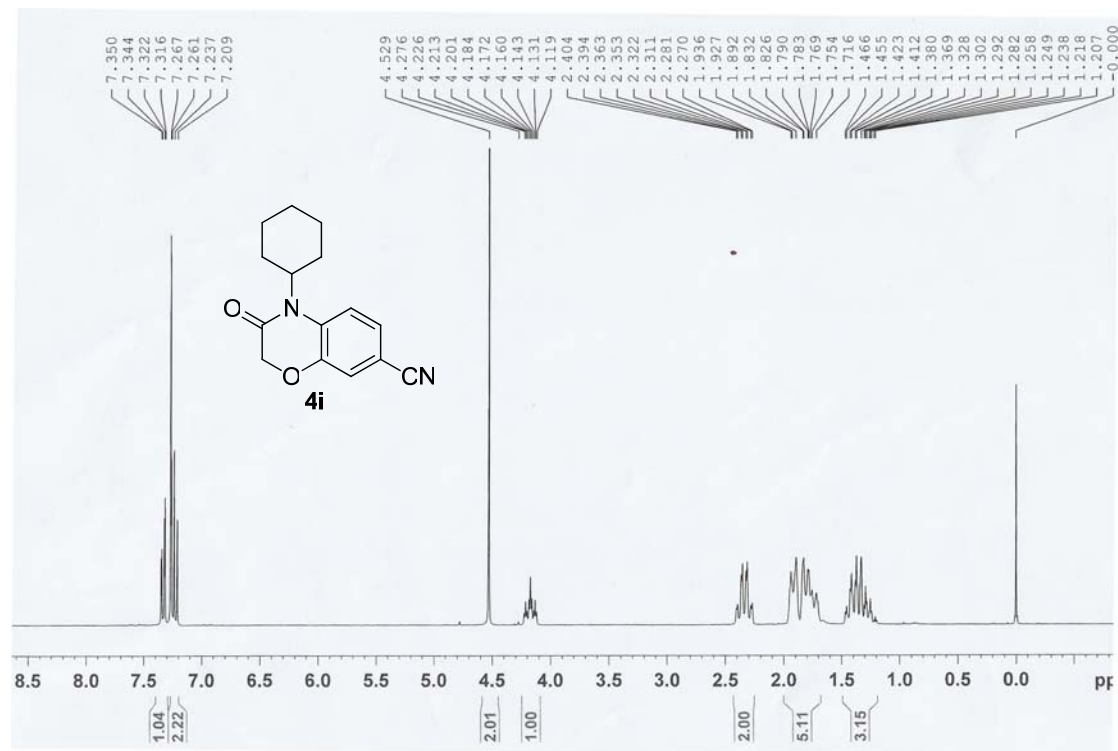

<sup>1</sup>H NMR (300 MHz, CDCl<sub>3</sub>)

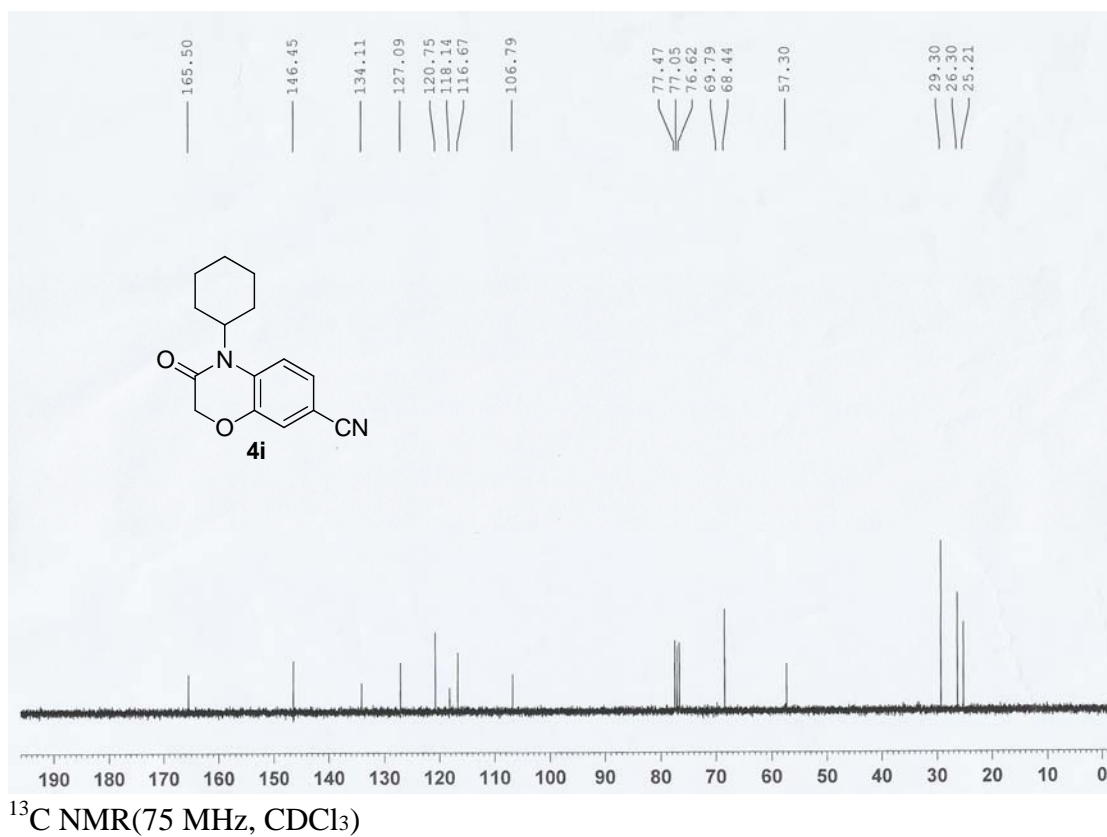

| Sample Name   | 20110622-zhan-224   | Position    | P1-C9    | Instrument Name | Instrument 1 | User Name              |                      |
|---------------|---------------------|-------------|----------|-----------------|--------------|------------------------|----------------------|
| Inj Vol       | -1                  | InjPosition |          | SampleType      | Sample       | IRM Calibration Status | Success              |
| Data Filename | 20110622-zhan-224.d | ACQ Method  | 0319-1.m | Comment         |              | Acquired Time          | 6/22/2011 9:55:12 AM |

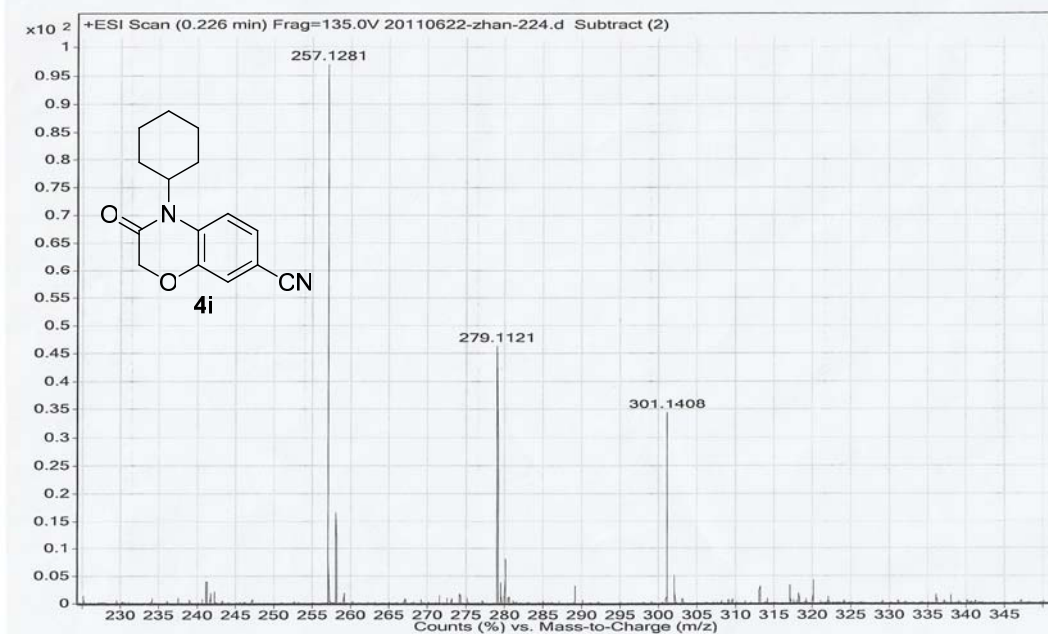

HRMS

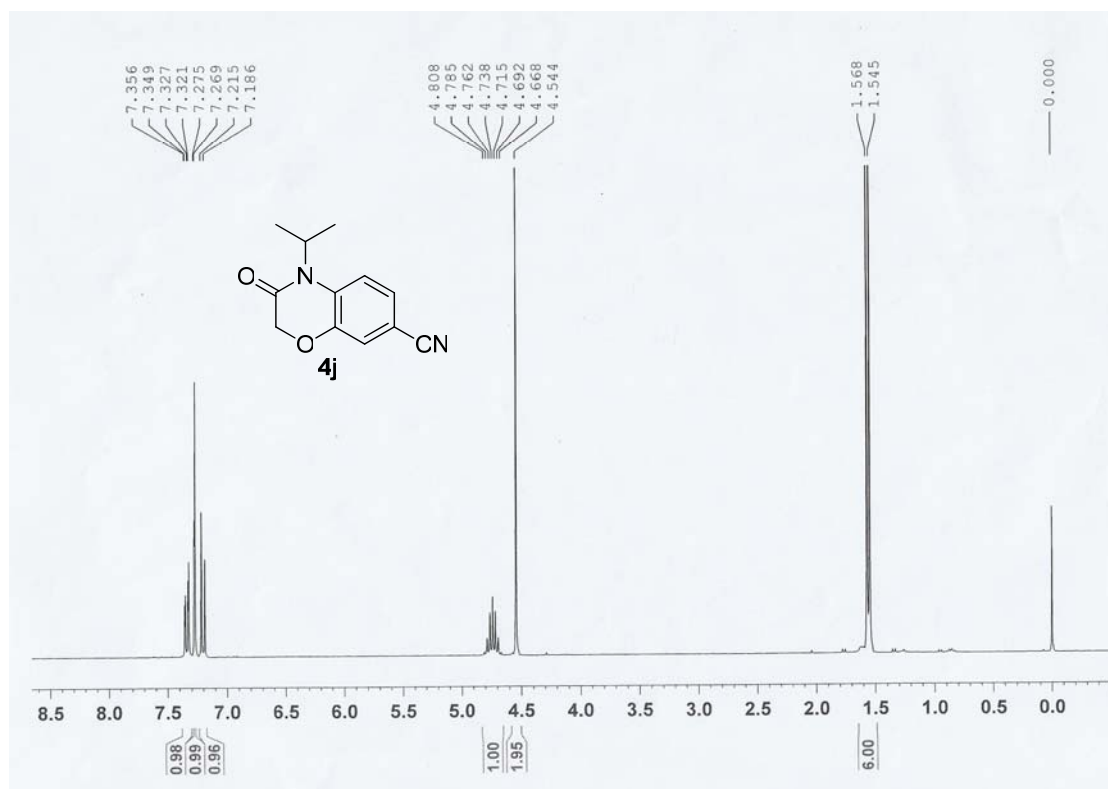

$^1\text{H NMR}$  (300 MHz,  $\text{CDCl}_3$ )

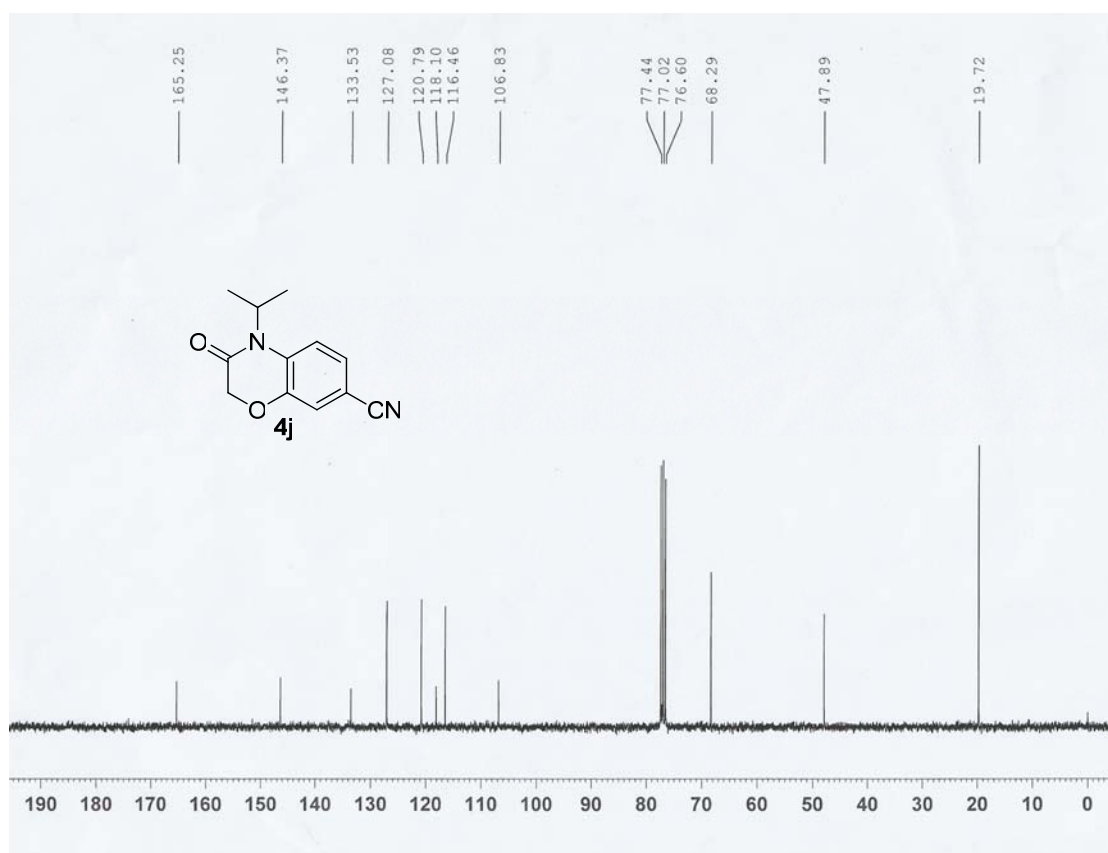

$^{13}\text{C NMR}$  (75 MHz,  $\text{CDCl}_3$ )

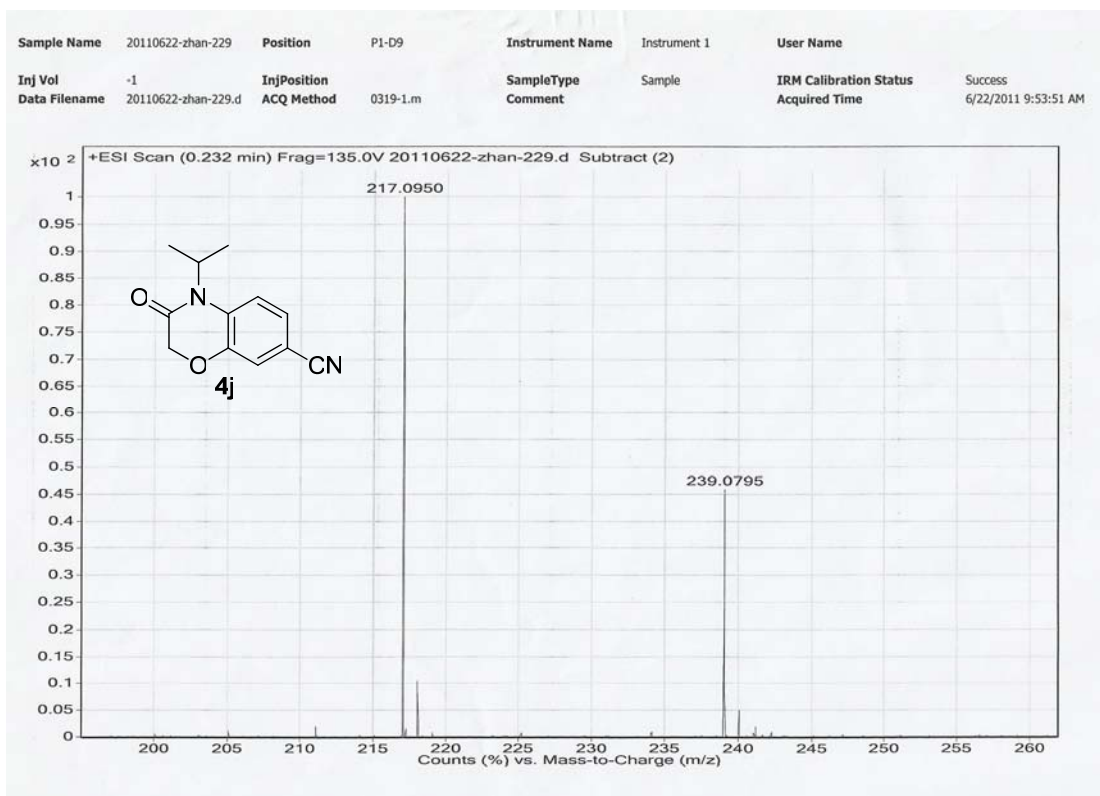

HRMS
